# Supplementary material for: New Tripeptide Derivatives Asperripeptides A–C from Vietnamese Mangrove-Derived Fungus Aspergillus terreus LM.5.2
Source: MDPI journal article supplement (doi:10.3390/md20010077), 2022-01-17

## SUPPLEMENTARY MATERIAL

# Tripeptide Derivatives from Vietnamese Mangrove-Derived Fungus *Aspergillus terreus* LM.5.2

Elena V. Girich<sup>1</sup>, Anton B. Rasin<sup>1</sup>, Roman S. Popov<sup>1</sup>, Ekaterina A. Yurchenko<sup>1</sup>, Ekaterina A. Chingizova<sup>1</sup>, Phan Thi Hoai Trinh<sup>2</sup>, Ngo Thi Duy Ngoc<sup>2</sup>, Mikhail V. Pivkin<sup>1</sup>, Olesya I. Zhuravleva<sup>3</sup> and Anton N. Yurchenko<sup>1,\*</sup>

- <sup>1</sup> G.B. Elyakov Pacific Institute of Bioorganic Chemistry, Far Eastern Branch of the Russian Academy of Sciences, Prospect 100-letiya Vladivostoka, 159, Vladivostok 690022, Russia; ev.ivanets@yandex.ru (E.V.G.), yurchant@ya.ru (A.N.Y.); abrus\_\_54@mail.ru (A.B.R.); prs\_90@mail.ru (R.S.P.); dminae@mail.ru (E.A.Y.), maryyas@mail.ru (E.A.C.), oid27@mail.ru (M.V.P.)
  - <sup>2</sup> Department of marine biotechnology, Nhatrang Institute of Technology Research and Application, Vietnam Academy of Science and Technology, Nha Trang, Vietnam; phanhoaitrinh84@gmail.com (P.T.H.T.); ngocnitra@gmail.com (N.T.D.N.)
  - <sup>3</sup> School of Natural Sciences, Far Eastern Federal University, Vladivostok, Russian Federation; zhuravleva.oi@dvfu.ru (O.I.Z.)
- \* Correspondence: yurchant@ya.ru; Tel.: +7-423-231-1168

Received: date; Accepted: date; Published: date

**Abstract:** Three new tripeptide-derivatives containing in their structures a rare cinnamic acid residue asterripeptides A-C (1-3) were isolated from Vietnamese mangrove-derived fungus *Aspergillus terreus* LM 5.2. Structures of isolated compounds were determined by NMR and ESIMS techniques combination. Absolute configurations of all stereocenters were determined using the Murfey's method via determining of amino acids configuration. Cytotoxicity against several cancer cell lines and inhibition ability of sortase A from *Staphylococcus aureus* of asterripeptides A-C were investigated.

**Keywords:** marine-derived fungi, mangrove-derived fungi, secondary metabolites, diketopiperazines, tripeptide derivatives, cinnamic acid, sortase A, cytotoxicity

## Content

|                                                                                                                                                                            |    |
|----------------------------------------------------------------------------------------------------------------------------------------------------------------------------|----|
| Figure S1. $^1\text{H}$ NMR spectrum of asterriptide A (1).....                                                                                                            | 4  |
| Figure S2. $^{13}\text{C}$ NMR spectrum of asterriptide A (1).....                                                                                                         | 6  |
| Figure S3. DEPT-135 spectrum of asterriptide A (1).....                                                                                                                    | 7  |
| Figure S4. $^1\text{H}$ - $^1\text{H}$ COSY spectrum of asterriptide A (1).....                                                                                            | 8  |
| Figure S5. HMBC spectrum of asterriptide A (1) .....                                                                                                                       | 9  |
| Figure S6. HSQC spectrum of asterriptide A (1).....                                                                                                                        | 10 |
| Figure S7. ROESY spectrum of asterriptide A (1) .....                                                                                                                      | 11 |
| Figure S8. MS and MS/MS data of asterriptide A (1).....                                                                                                                    | 12 |
| Figure S9. $^1\text{H}$ NMR data of asterriptide B (2).....                                                                                                                | 13 |
| Figure S10. $^{13}\text{C}$ NMR spectrum of asterriptide B (2).....                                                                                                        | 15 |
| Figure S11. DEPT NMR spectrum of asterriptide B (2) .....                                                                                                                  | 16 |
| Figure S12. HSQC spectrum of asterriptide B (2).....                                                                                                                       | 17 |
| Figure S13. HMBC spectrum of asterriptide B (2).....                                                                                                                       | 18 |
| Figure S14. $^1\text{H}$ - $^1\text{H}$ COSY spectrum of asterriptide B (2).....                                                                                           | 19 |
| Figure S15. NOESY spectrum of asterriptide B (2) .....                                                                                                                     | 20 |
| Figure S16. MS and MS/MS data of asterriptide B (2) .....                                                                                                                  | 21 |
| Figure S17. $^1\text{H}$ NMR spectrum of asterriptide C (3).....                                                                                                           | 22 |
| Figure S18. $^{13}\text{C}$ NMR spectrum of asterriptide C (3).....                                                                                                        | 24 |
| Figure S19. DEPT NMR spectrum of asterriptide C (3) .....                                                                                                                  | 25 |
| Figure S20. HSQC NMR spectrum of asterriptide C (3).....                                                                                                                   | 26 |
| Figure S21. HMBC NMR spectrum of asterriptide C (3).....                                                                                                                   | 27 |
| Figure S22. $^1\text{H}$ - $^1\text{H}$ COSY NMR spectrum of asterriptide C (3).....                                                                                       | 28 |
| Figure S23. ROESY NMR spectrum of asterriptide C (3) .....                                                                                                                 | 29 |
| Figure S24. MS and MS/MS data of asterriptide C (3) .....                                                                                                                  | 30 |
| Figure S25. HPLC profile of <i>L</i> -FDAA-derivatives of asterriptide A (1) hydrolysis products (HP).....                                                                 | 31 |
| Figure S26. HPLC profile of <i>L</i> -FDAA-derivatives of asterriptide A (1) HP (a), asterriptide A HP+ <i>L</i> -Ile (b) and asterriptide A HP+ <i>D,L</i> -Ile (c) ..... | 32 |
| Figure S27. HPLC profile of <i>L</i> -FDAA-derivatives of asterriptide A (1) HP, asterriptide A HP+ <i>L</i> -Phe and asterriptide A HP+ <i>D,L</i> -Phe.....              | 33 |
| Figure S28. HPLC profile of <i>L</i> -FDAA-derivatives of asterriptide A (1) HP, asterriptide A HP+ <i>D,L</i> -Pro and asterriptide A HP+ <i>L</i> -Pro.....              | 34 |
| Figure S29. HPLC profile of <i>L</i> -FDAA-derivatives of asterriptide B (2) HP .....                                                                                      | 35 |

|                                                                                                                                                                                |    |
|--------------------------------------------------------------------------------------------------------------------------------------------------------------------------------|----|
| Figure S30. HPLC profiles of <i>L</i> -FDAA-derivatives of asterriptide B (2) HP (a),<br>asterriptide B HP+ <i>L</i> -Leu (b) and asterriptide B HP+ <i>D,L</i> -Leu (c).....  | 36 |
| Figure S31. HPLC profiles of <i>L</i> -FDAA-derivatives of asterriptide B (2) HP (a),<br>asterriptide B+ <i>D,L</i> -Pro (b) and asterriptide B+ <i>L</i> -Pro (c) .....       | 37 |
| Figure S32. HPLC profiles of <i>L</i> -FDAA-derivatives of asterriptide B (2) HP (a),<br>asterriptide B HP+ <i>L</i> -Phe (b) and asterriptide B HP+ <i>D,L</i> -Phe (c) ..... | 38 |
| Figure S33. HPLC profile of <i>L</i> -FDAA-derivatives of asterriptide C (3) HP .....                                                                                          | 39 |
| Figure S34. HPLC profiles of <i>L</i> -FDAA-derivatives of asterriptide C (3) HP (a),<br>asterriptide C+ <i>L</i> -Val H (b)P and asterriptide C HP+ <i>D,L</i> -Val (c) ..... | 40 |
| Figure S35. HPLC profiles of <i>L</i> -FDAA-derivatives of asterriptide C (3) HP (a),<br>asterriptide C HP+ <i>L</i> -Pro (b) and asterriptide C HP+ <i>D,L</i> -Pro (c).....  | 41 |
| Figure S36. HPLC profiles of <i>L</i> -FDAA-derivatives of asterriptide C (3) HP (a),<br>asterriptide C HP+ <i>D,L</i> -Phe (b) and asterriptide C HP+ <i>L</i> -Phe (c) ..... | 42 |

Figure S1. <sup>1</sup>H NMR spectrum of asterriptide A (1)

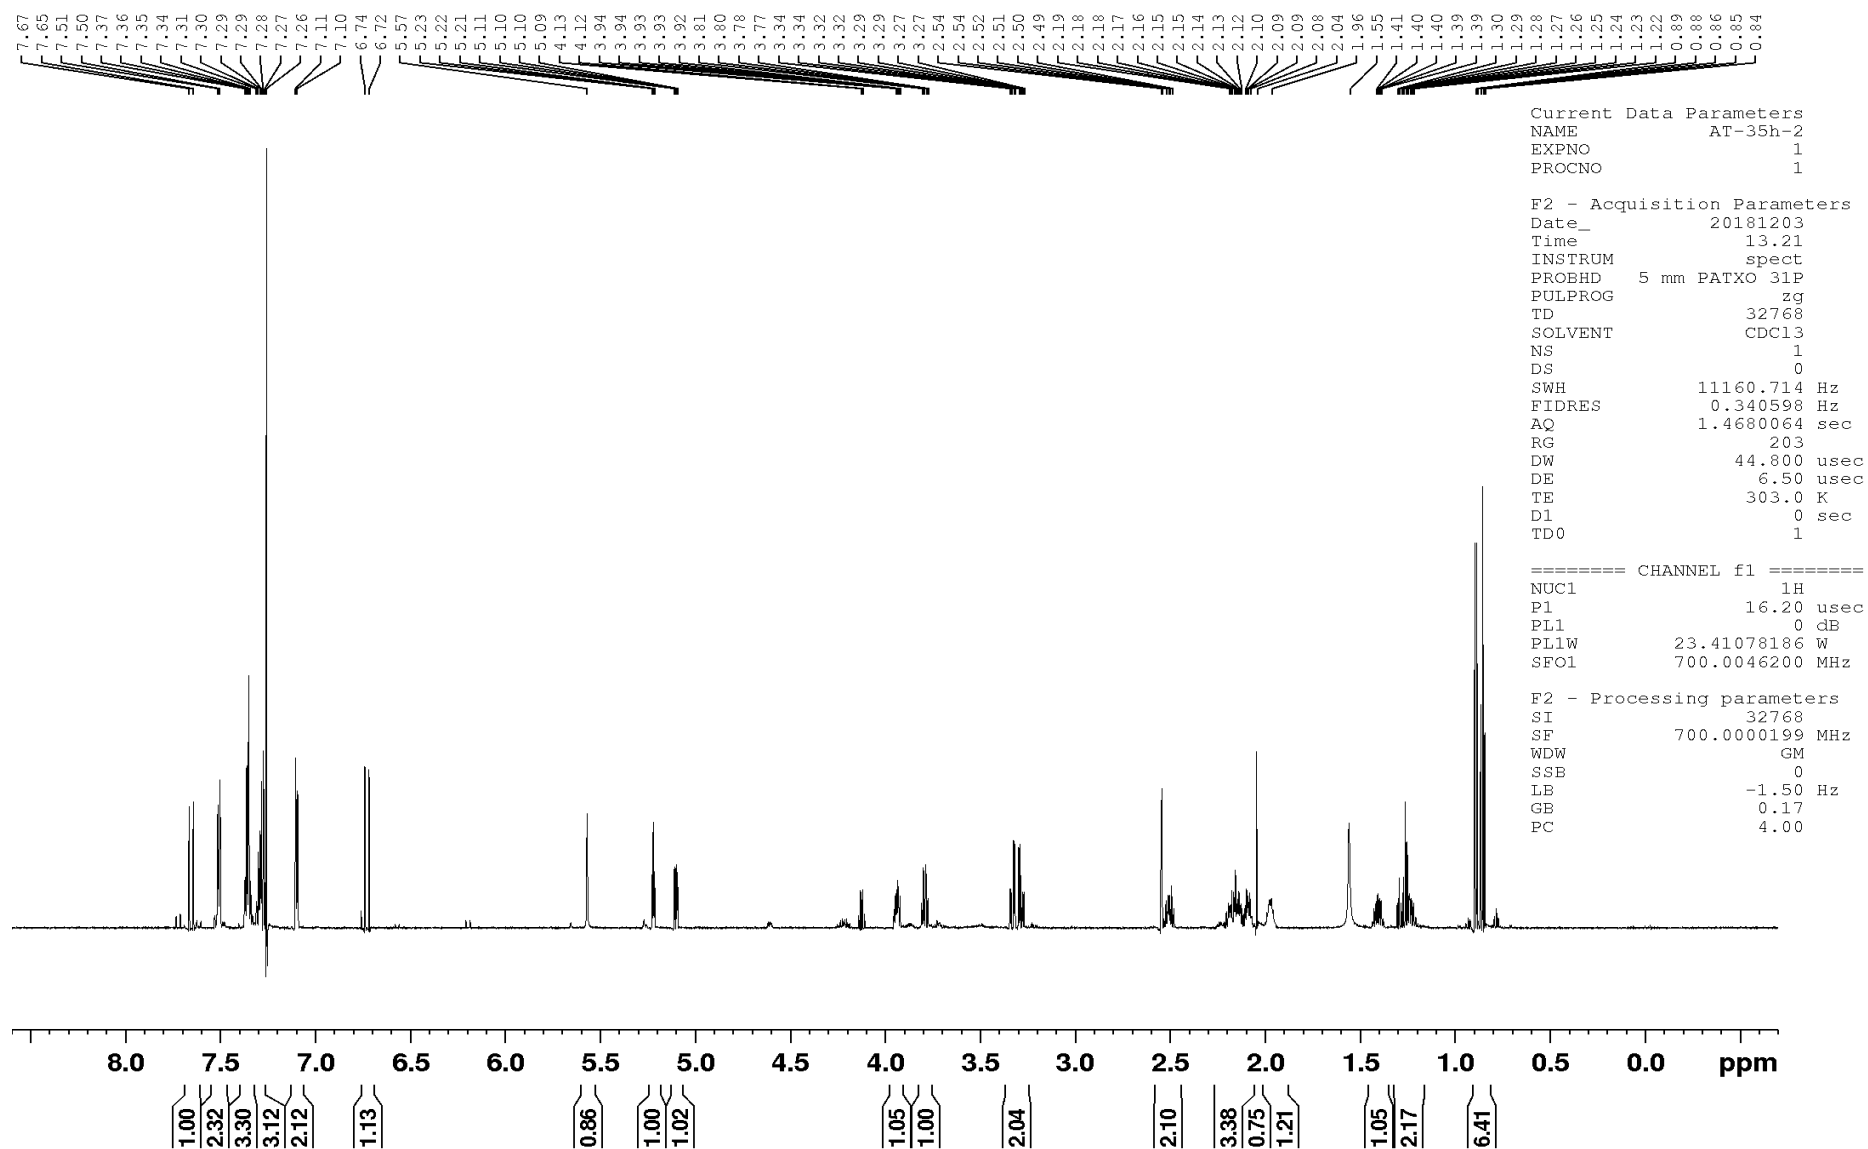

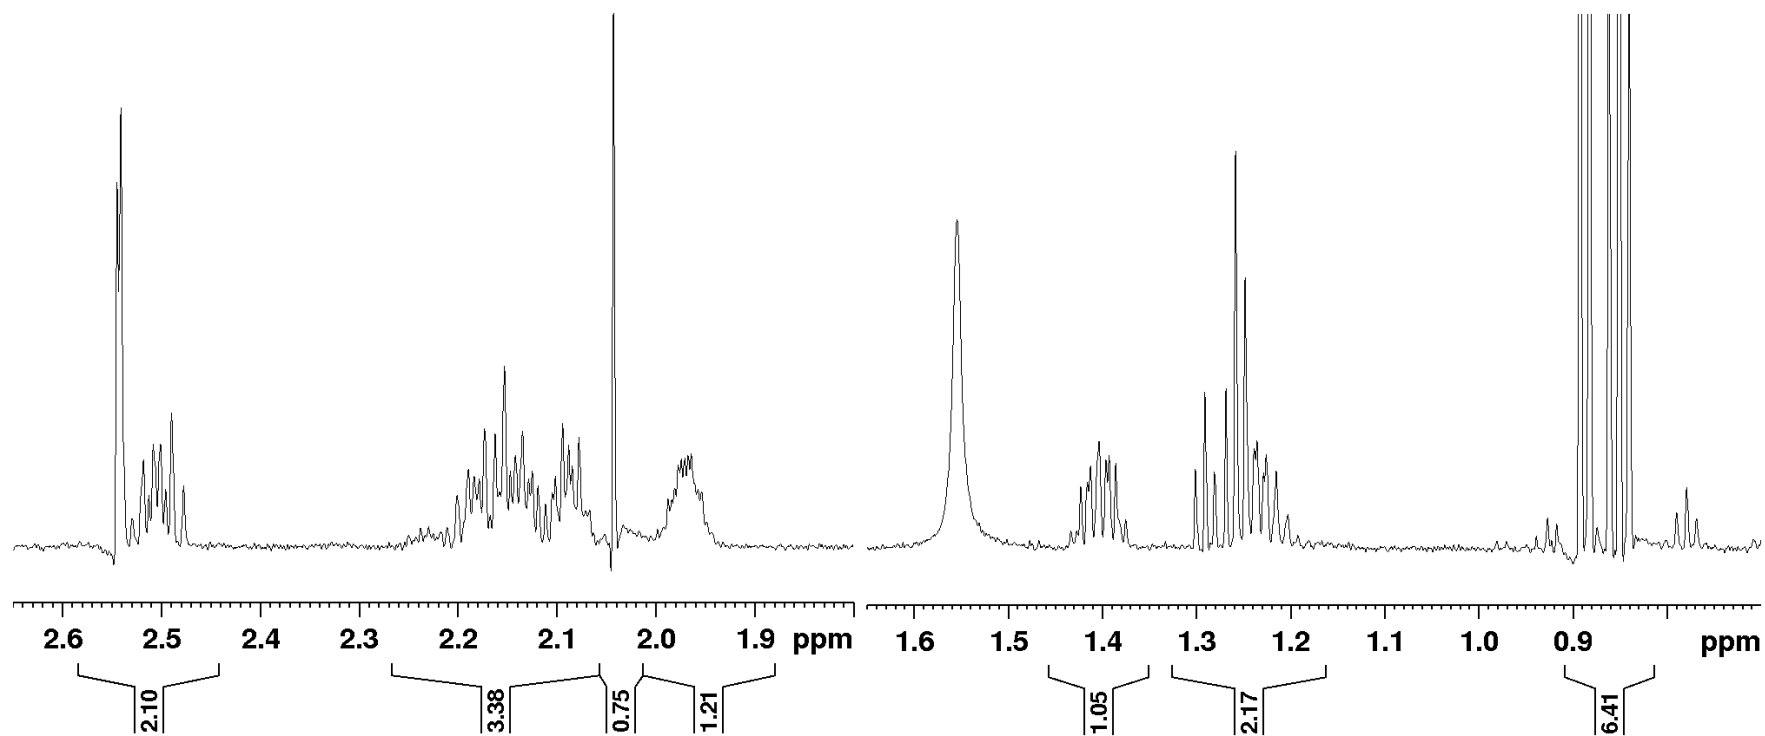

Figure S2.  $^{13}\text{C}$  NMR spectrum of asterripeptide A (1)

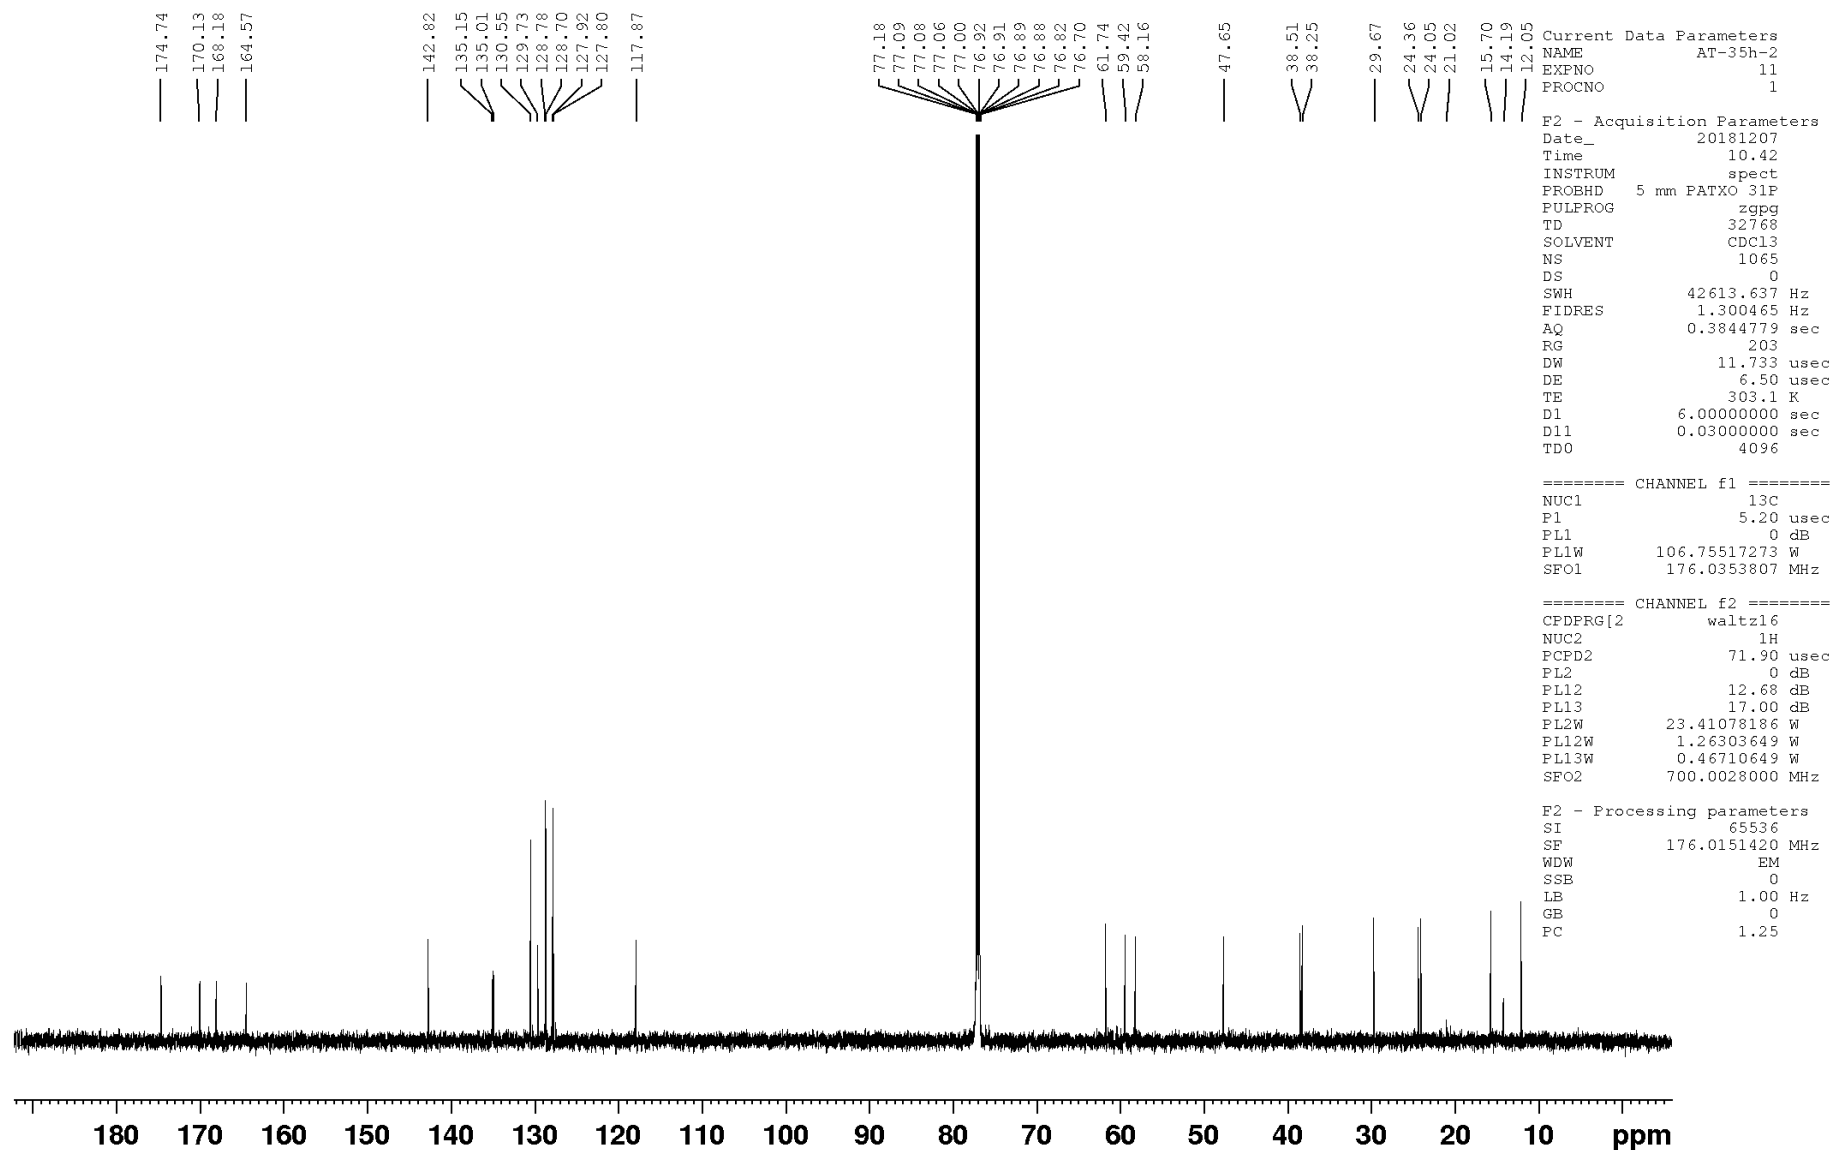

Figure S3. DEPT-135 spectrum of asterripeptide A (1)

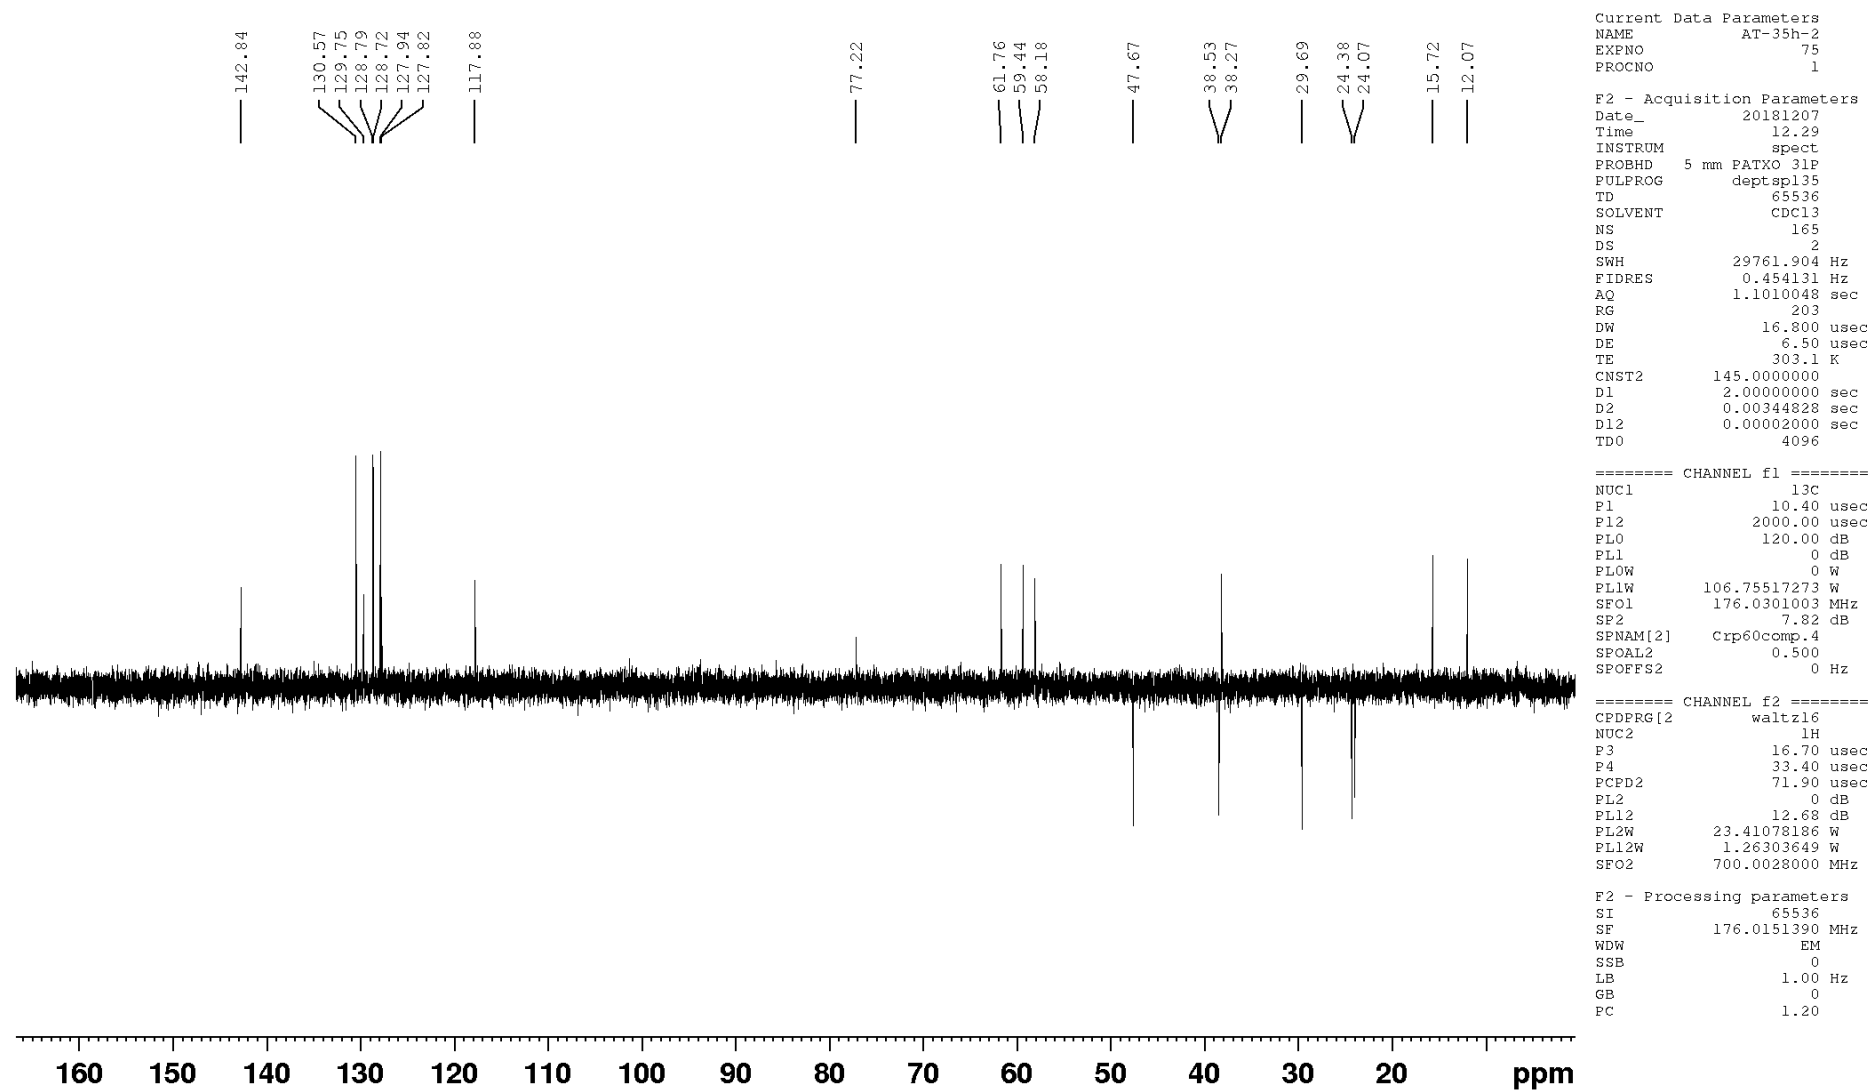

Figure S4. <sup>1</sup>H-<sup>1</sup>H COSY spectrum of asterriptide A (1)

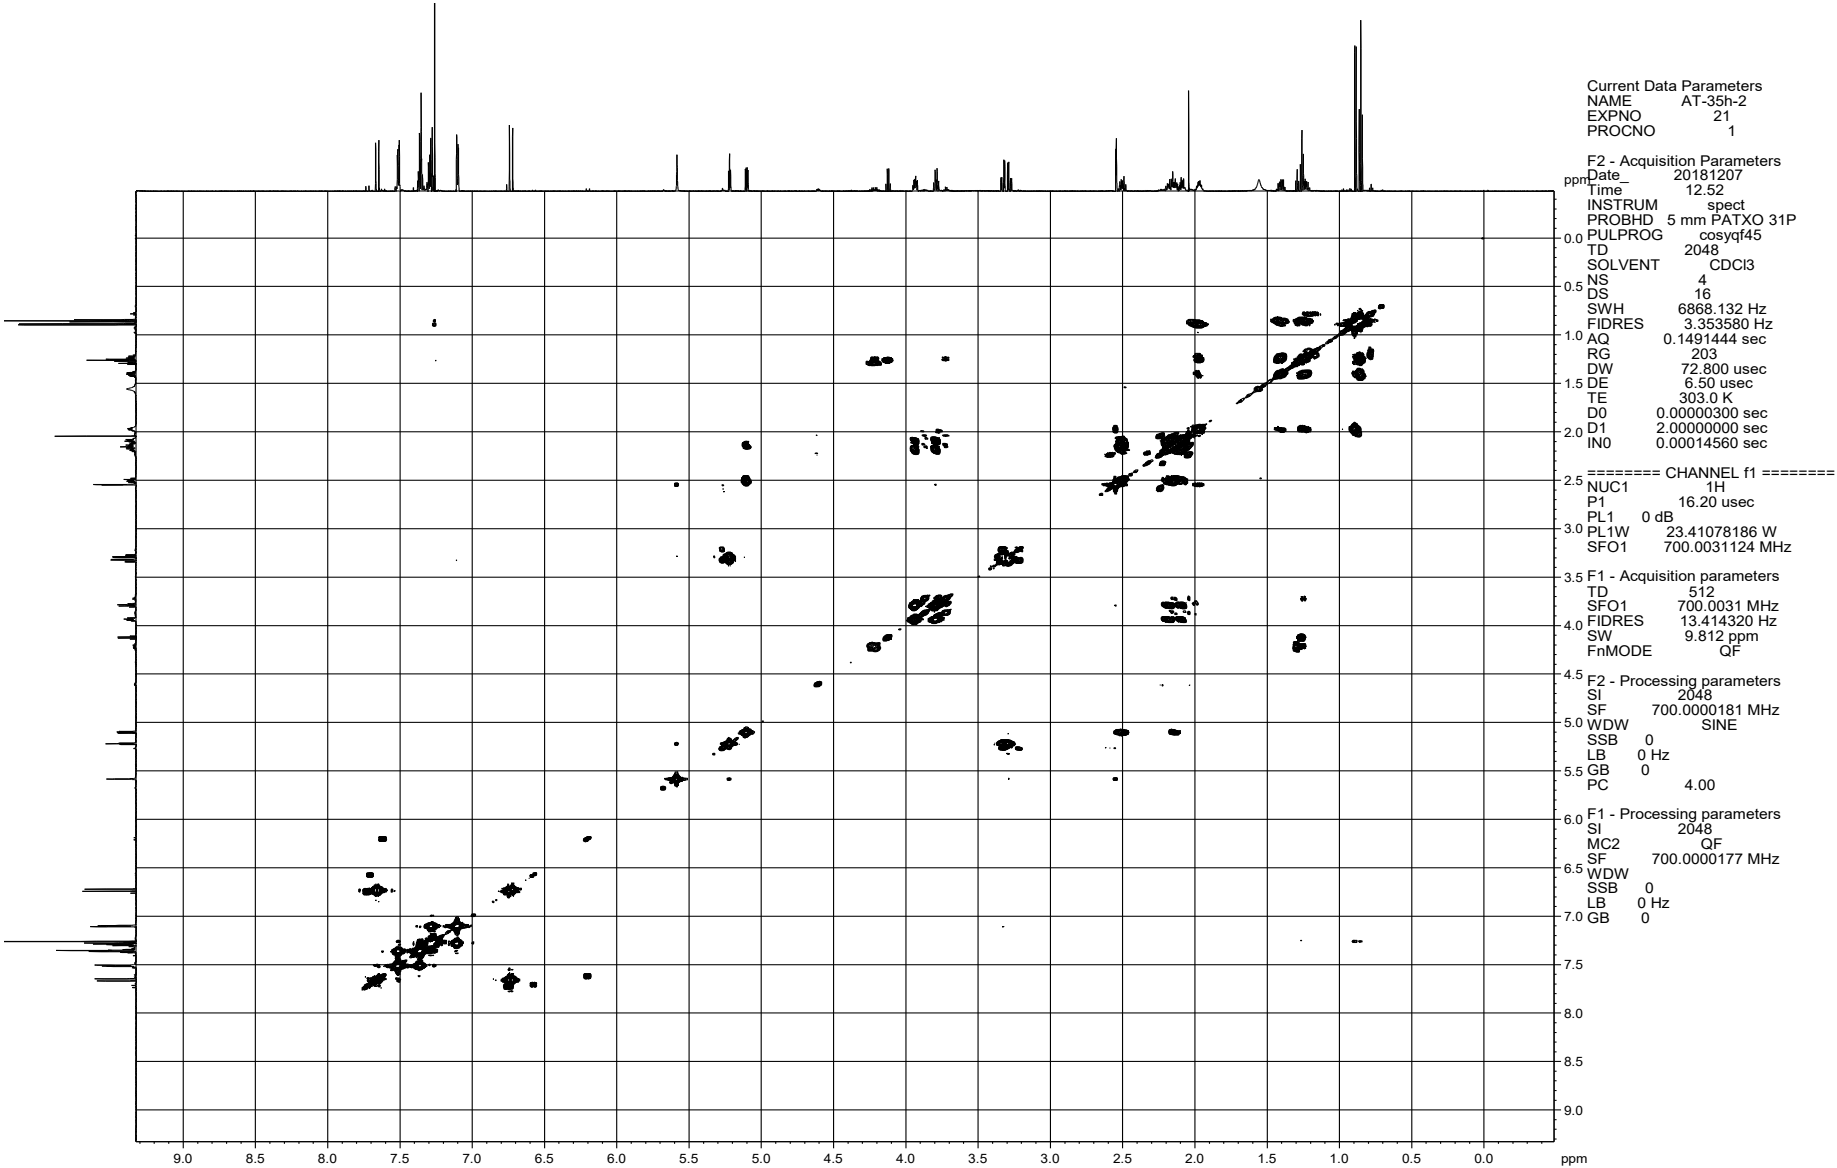



Figure S5. HMBC spectrum of asterripeptide A (1)

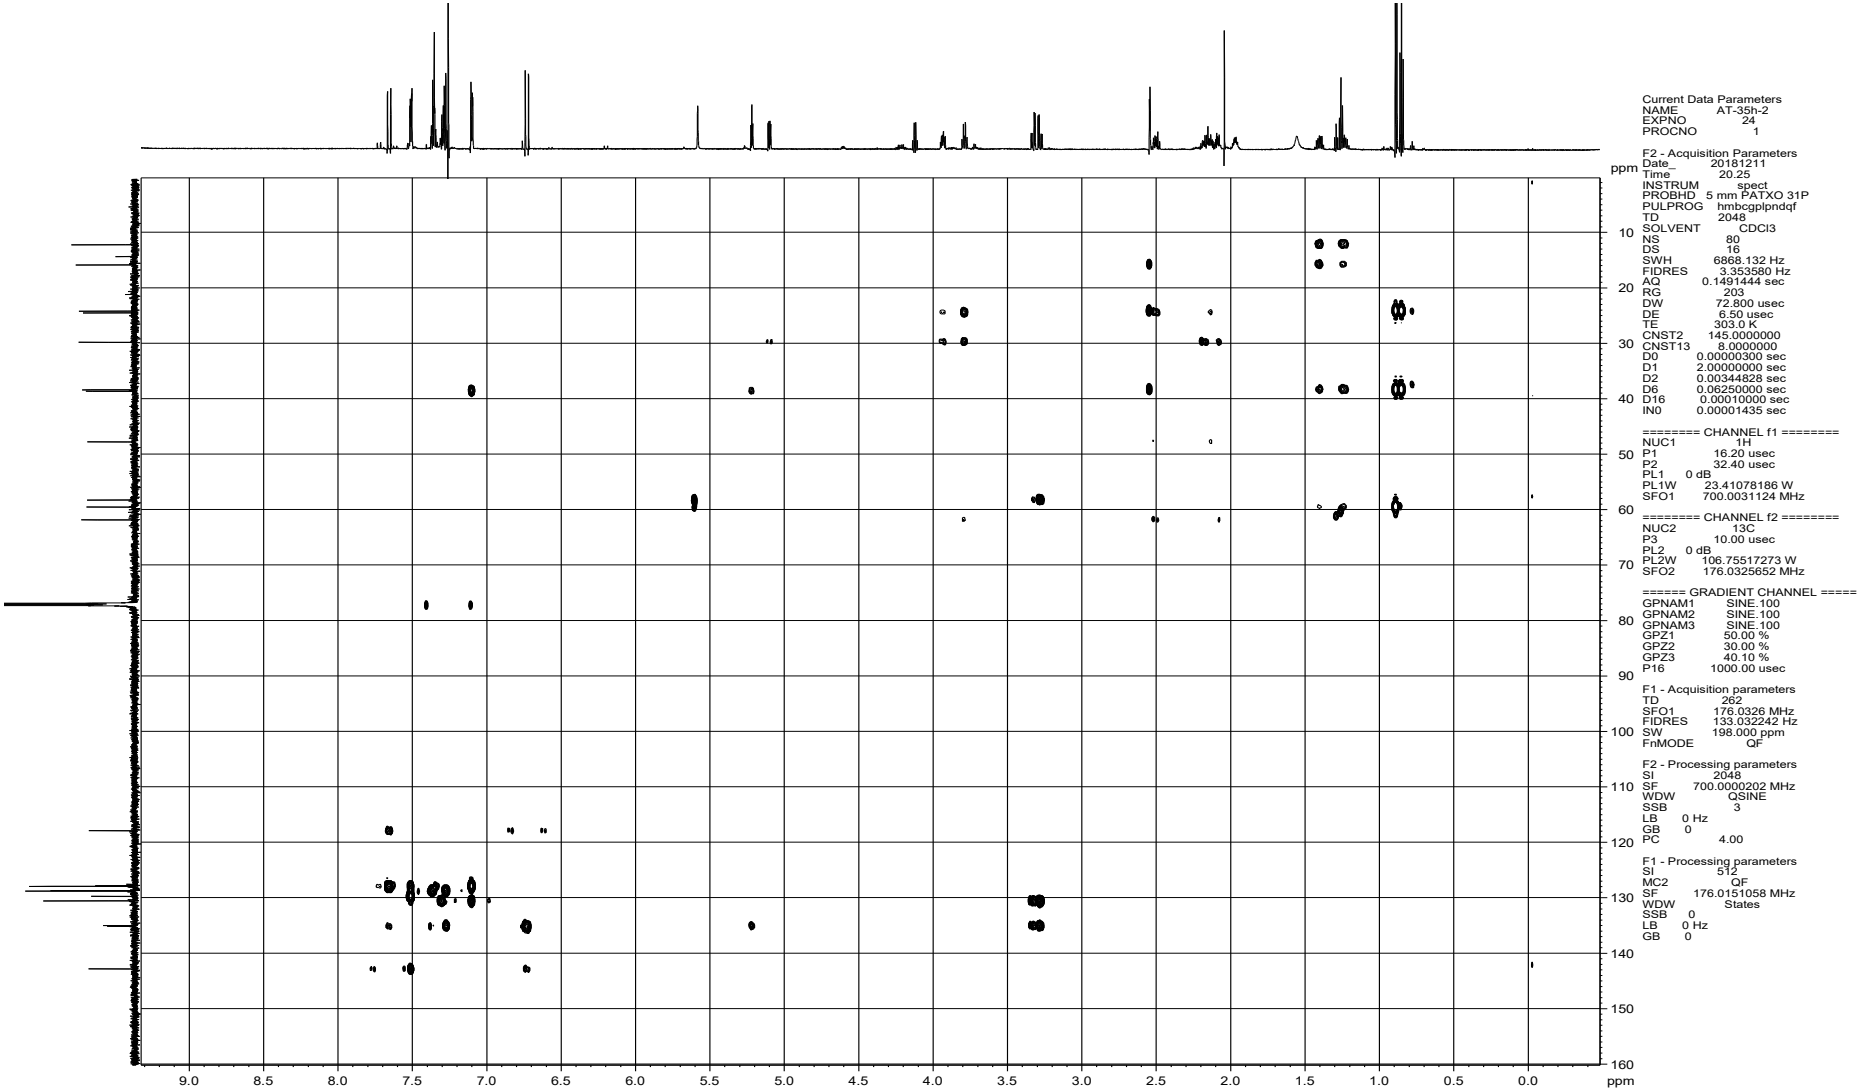

Figure S6. HSQC spectrum of asterripeptide A (1)

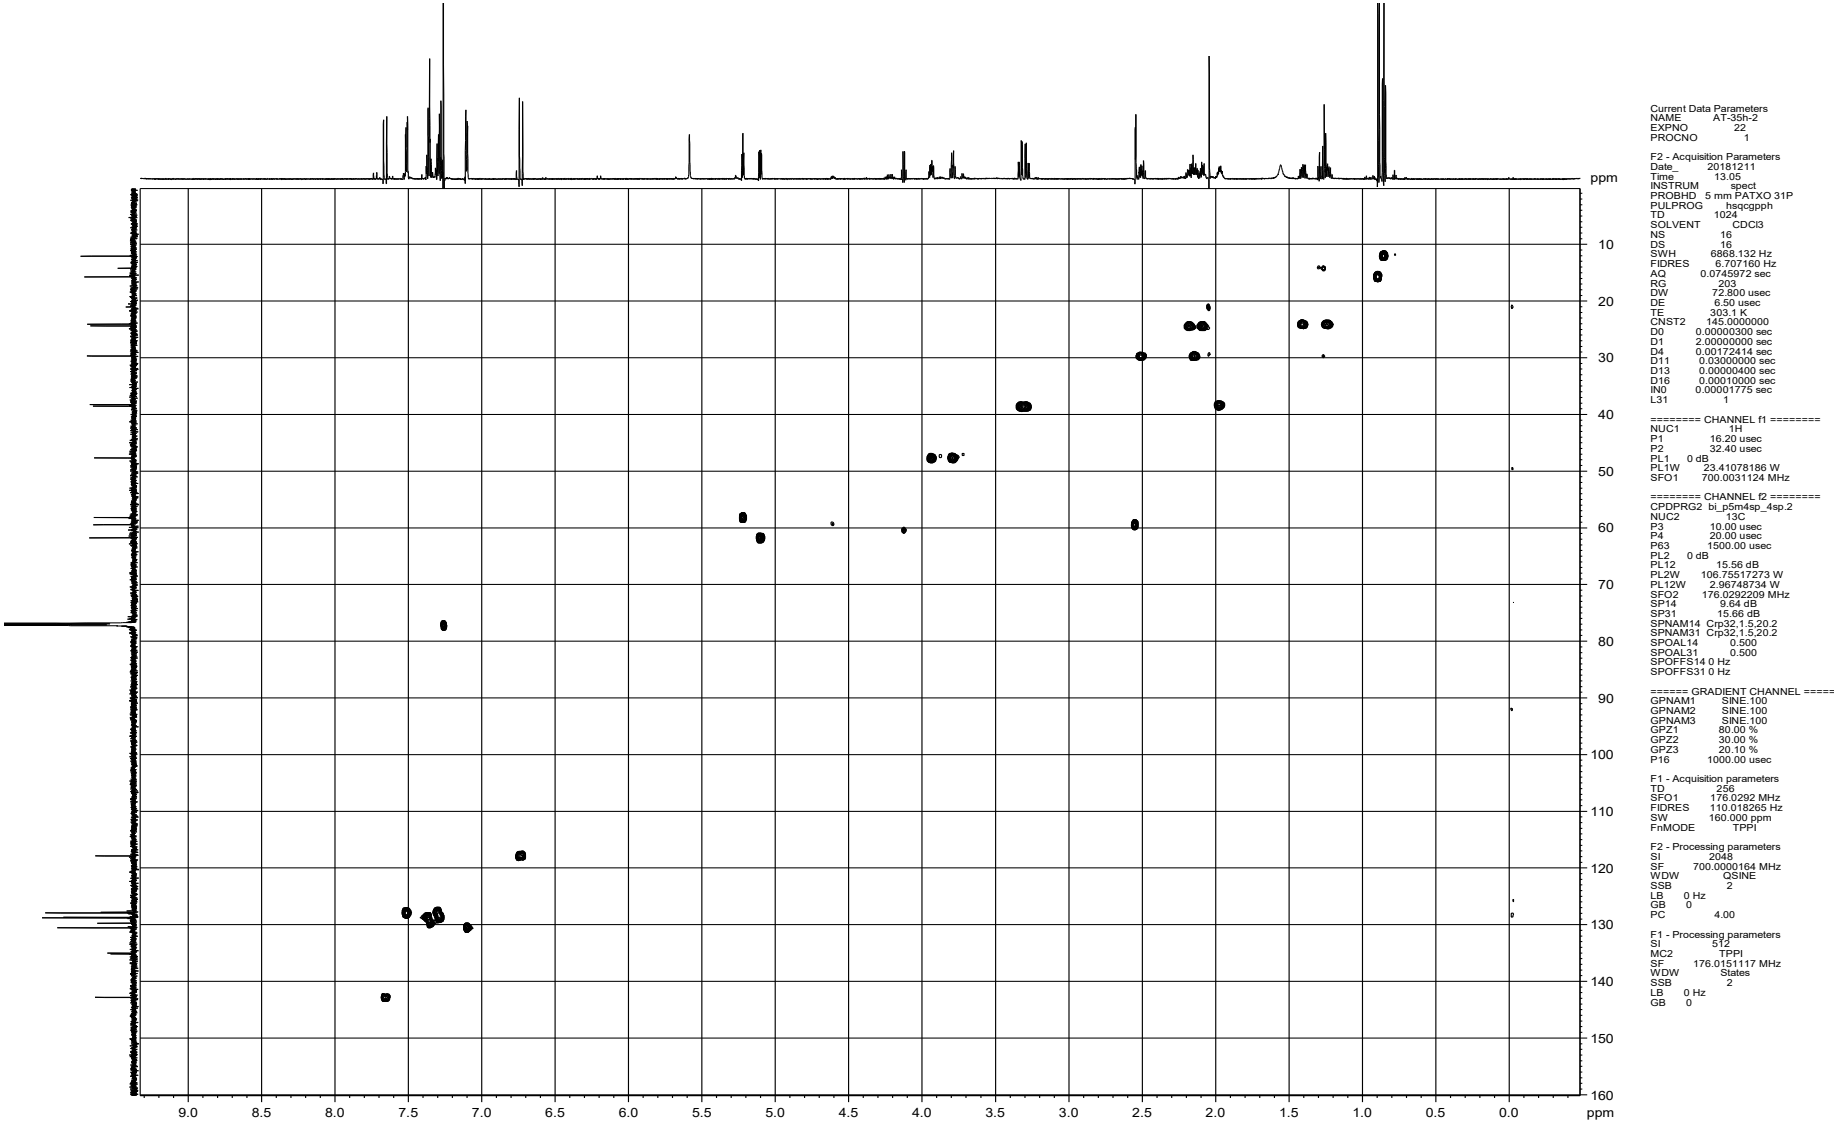

Figure S7. ROESY spectrum of asterriptide A (1)

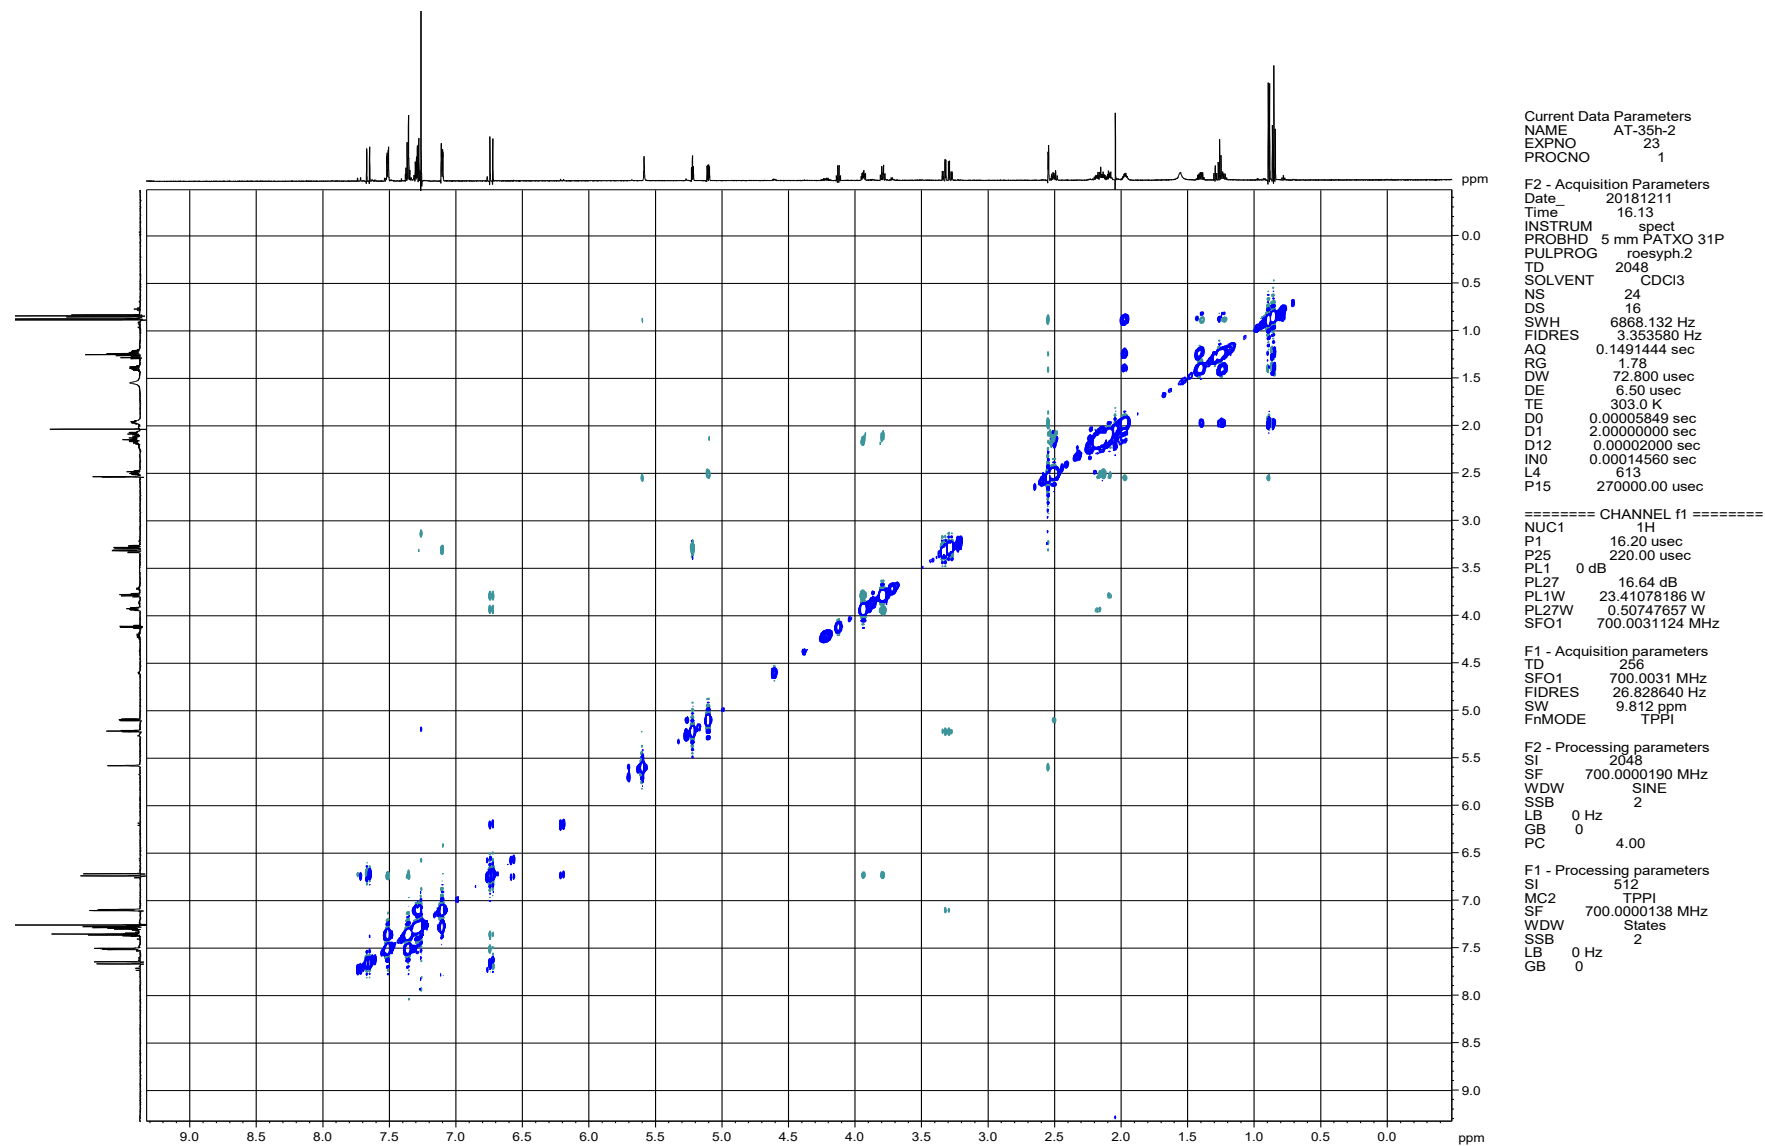

**Figure S8. MS and MS/MS data of asterriptide A (1)**

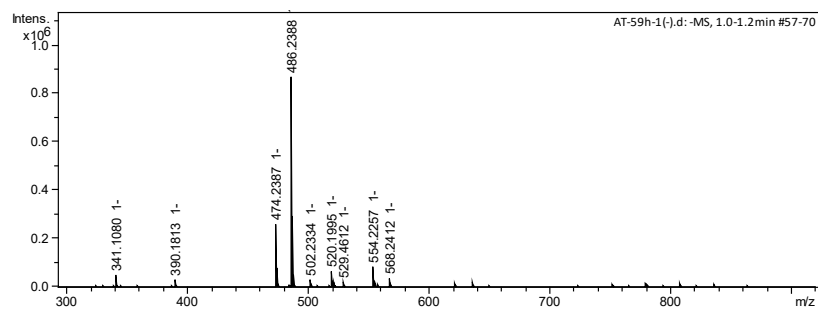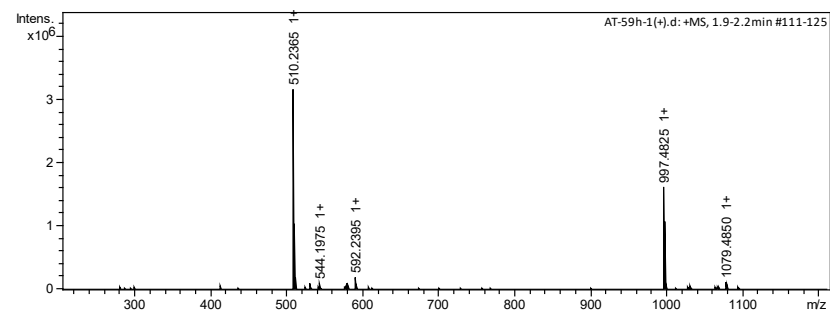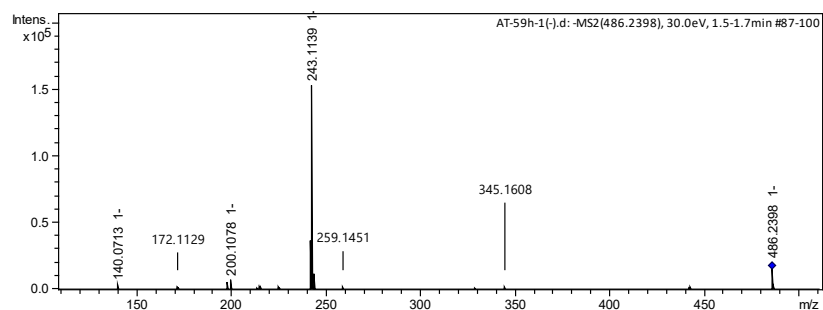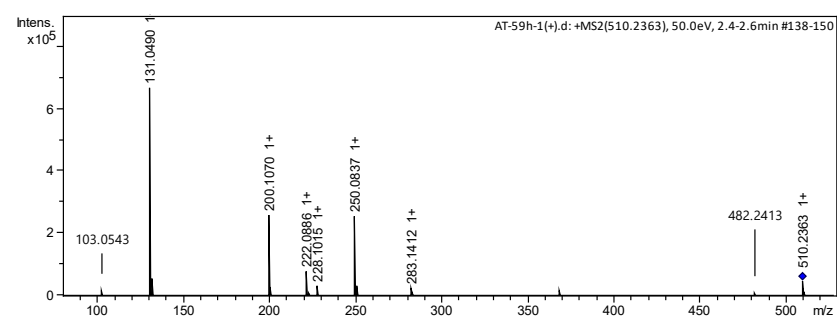

|                     | meas.    | calc.    | $\Delta$ (ppm) |
|---------------------|----------|----------|----------------|
| [M-H] <sup>-</sup>  | 486,2387 | 486,2398 | 2,2            |
| [M+Na] <sup>+</sup> | 510,2365 | 510,2363 | -0,3           |

Figure S9.  $^1\text{H}$  NMR data of asterriptide B (2)

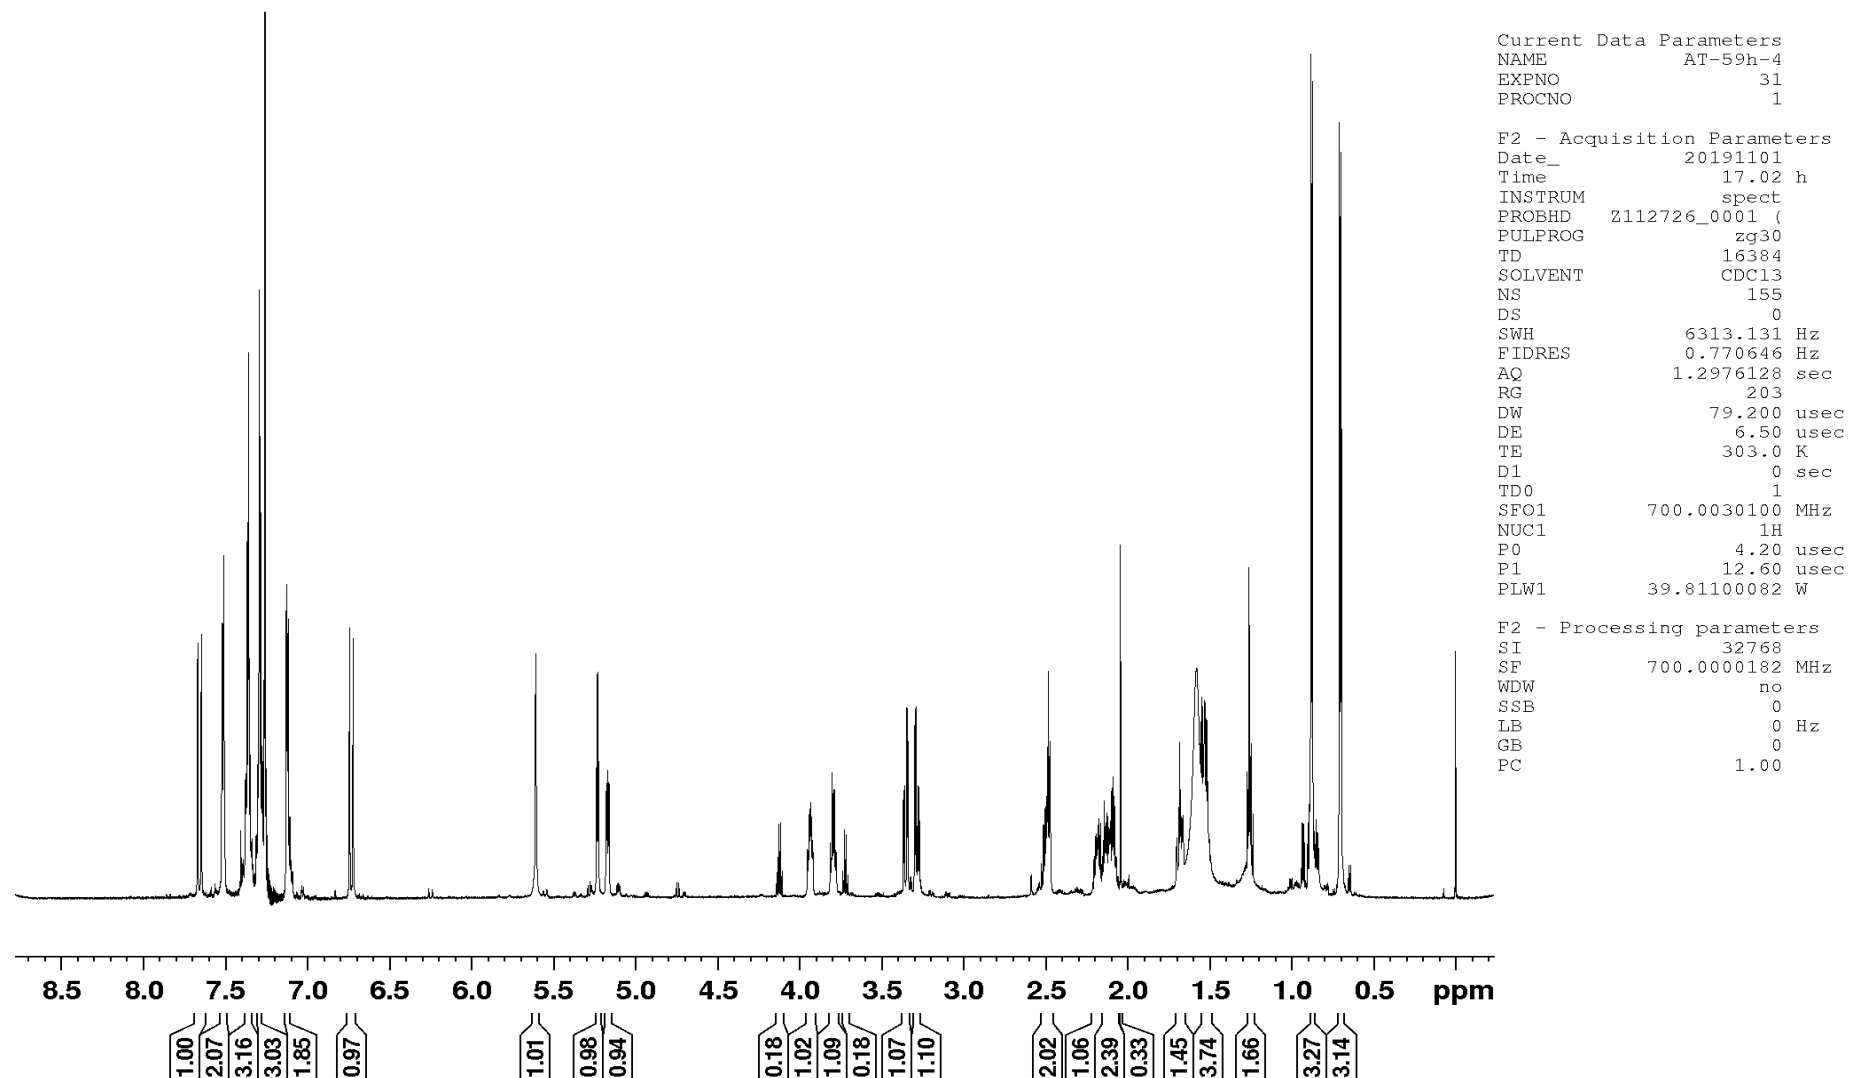

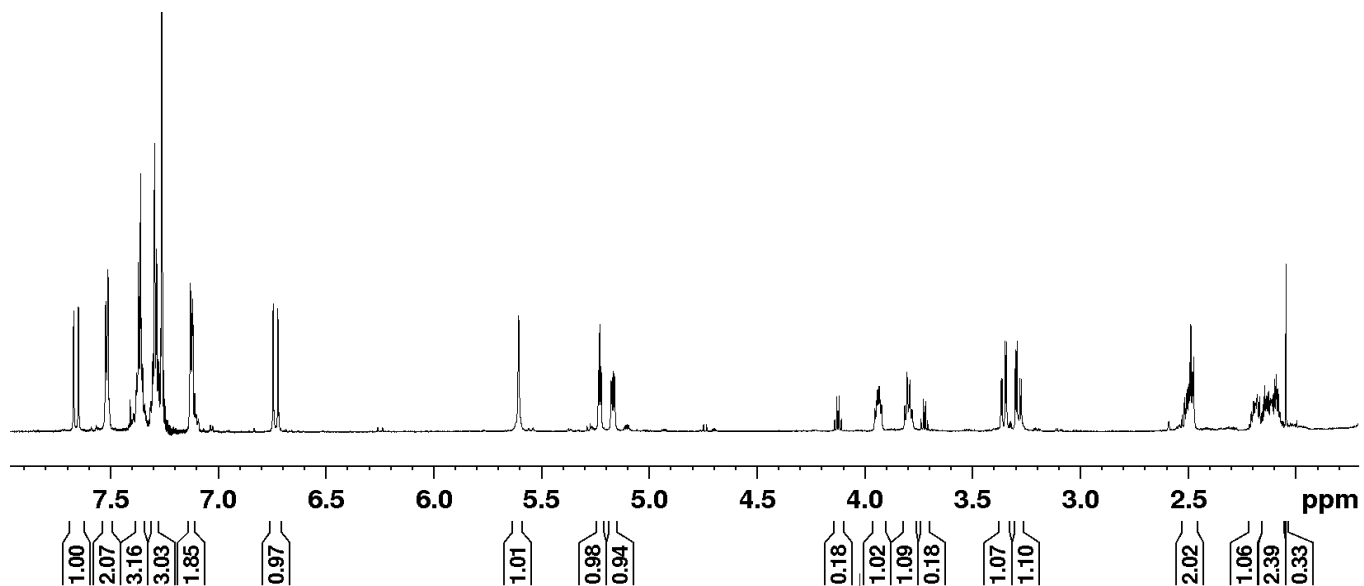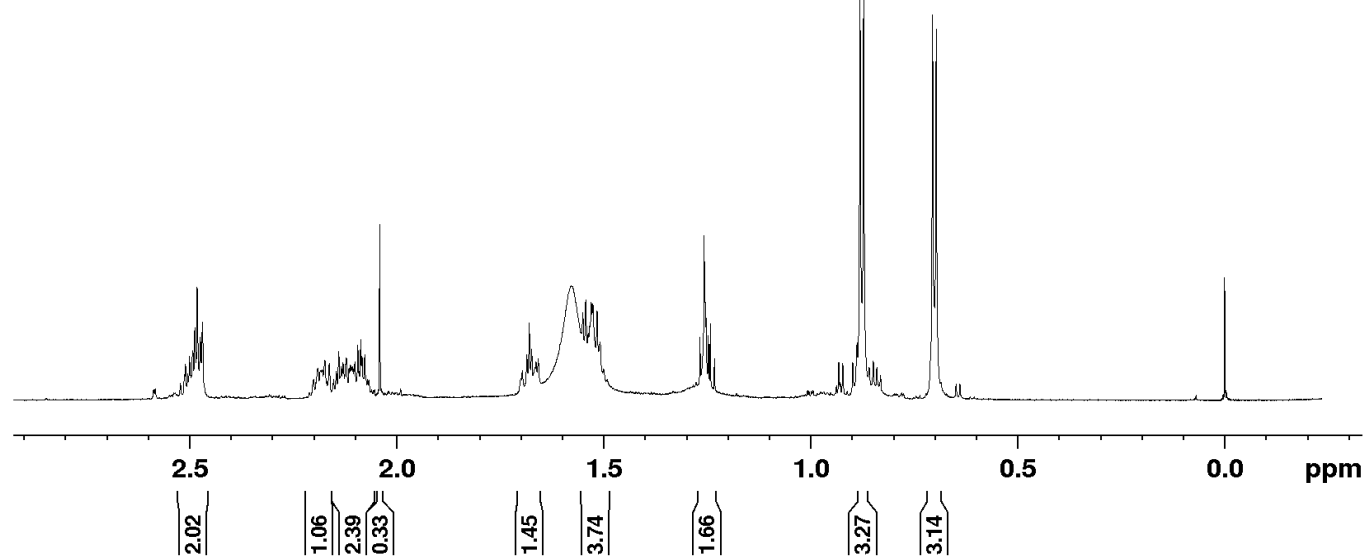

Current Data Parameters  
 NAME AT-59h-4  
 EXPNO 31  
 PROCNO 1

F2 - Acquisition Parameters  
 Date\_ 20191101  
 Time 17.02 h  
 INSTRUM spect  
 PROBHD Z112726\_0001 (  
 PULPROG zg30  
 TD 16384  
 SOLVENT CDC13  
 NS 155  
 DS 0  
 SWH 6313.131 Hz  
 FIDRES 0.770646 Hz  
 AQ 1.2976128 sec  
 RG 203  
 DW 79.200 usec  
 DE 6.50 usec  
 TE 303.0 K  
 D1 0 sec  
 TD0 1  
 SFO1 700.0030100 MHz  
 NUC1 1H  
 P0 4.20 usec  
 P1 12.60 usec  
 PLW1 39.81100082 W

F2 - Processing parameters  
 SI 32768  
 SF 700.0000182 MHz  
 WDW no  
 SSB 0  
 LB 0 Hz  
 GB 0  
 PC 1.00

Figure S10.  $^{13}\text{C}$  NMR spectrum of asterriptide B (2)

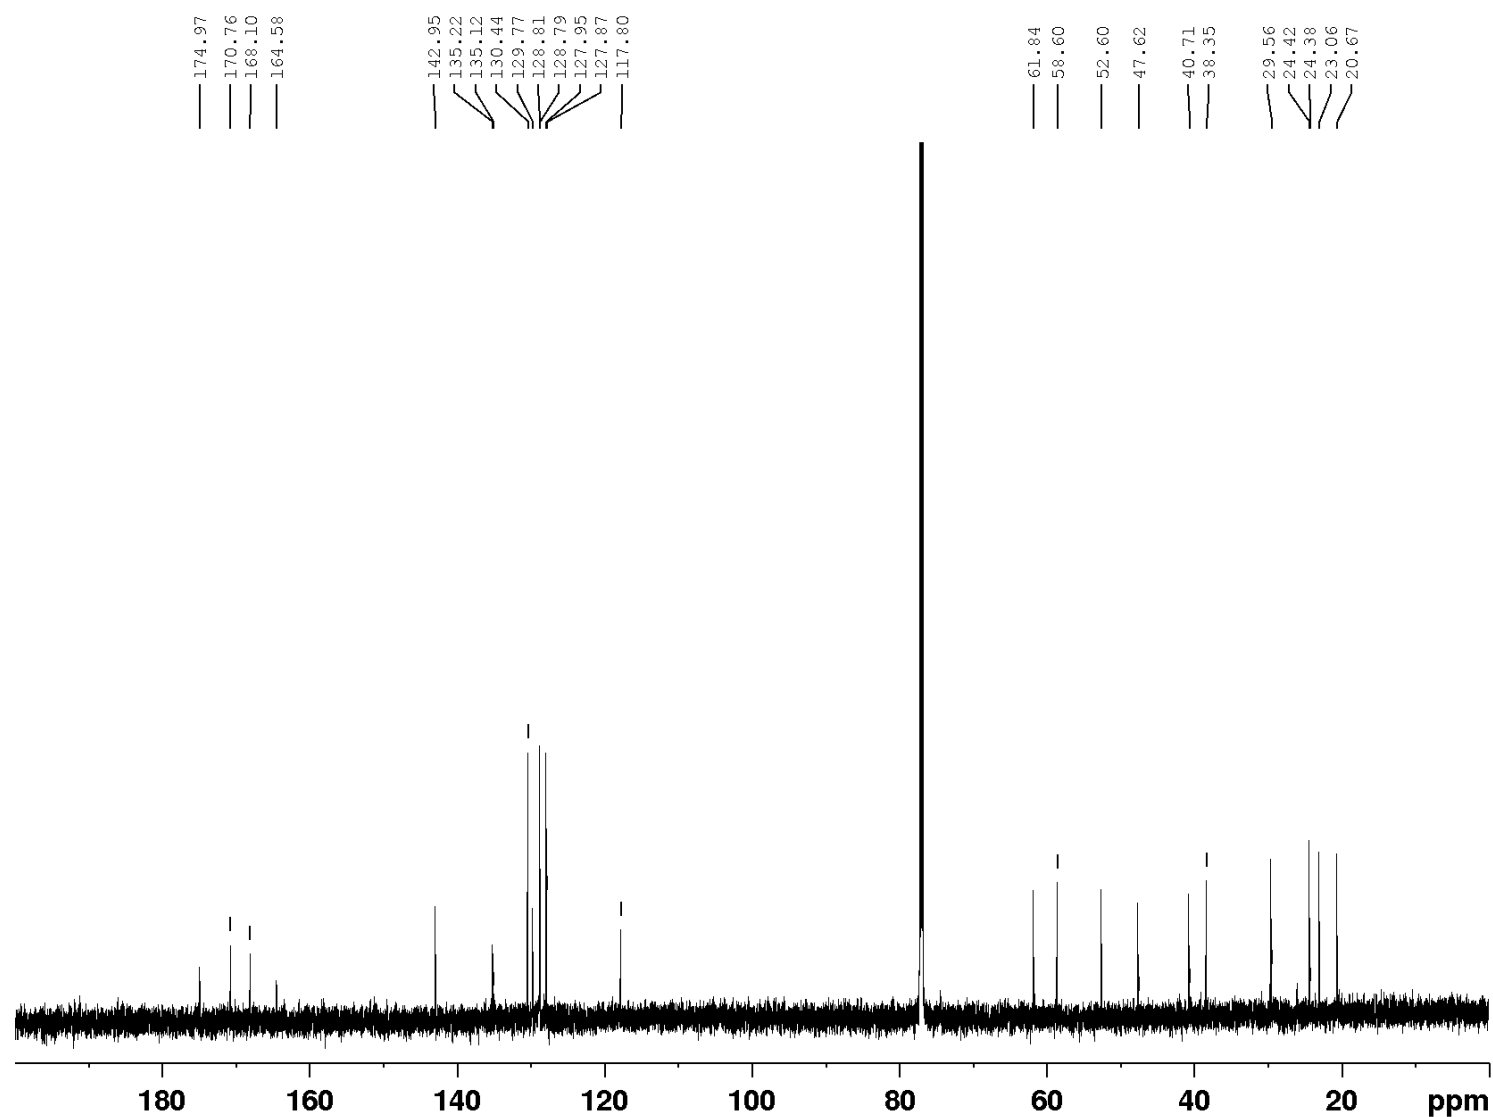

# Current Data Parameters

NAME AT-59h-4  
EXPNO 3730  
PROCNO 1

# F2 - Acquisition Parameters

Date\_ 20191102  
Time 11.57 h  
INSTRUM spect  
PROBHD Z112726\_0001 (  
PULPROG zgpg30  
TD 65536  
SOLVENT  $\text{CDCl}_3$   
NS 3029  
DS 2  
SWH 42613.637 Hz  
FIDRES 1.300465 Hz  
AQ 0.7689557 sec  
RG 203  
DW 11.733 usec  
DE 6.50 usec  
TE 303.8 K  
D1 0.50000000 sec  
D11 0.03000000 sec  
TD0 4096  
SFO1 176.0353807 MHz  
NUC1  $^{13}\text{C}$   
P0 3.50 usec  
P1 10.50 usec  
PLW1 35.48099899 W  
SFO2 700.0028000 MHz  
NUC2  $^1\text{H}$   
CPDPRG[2] waltz16  
PCPD2 70.00 usec  
PLW2 39.81100082 W  
PLW12 1.43719995 W  
PLW13 0.83929998 W

# F2 - Processing parameters

SI 65536  
SF 176.0151407 MHz  
WDW EM  
SSB 0  
LB 1.00 Hz  
GB 0  
PC 1.00

Figure S11. DEPT NMR spectrum of asterriptide B (2)

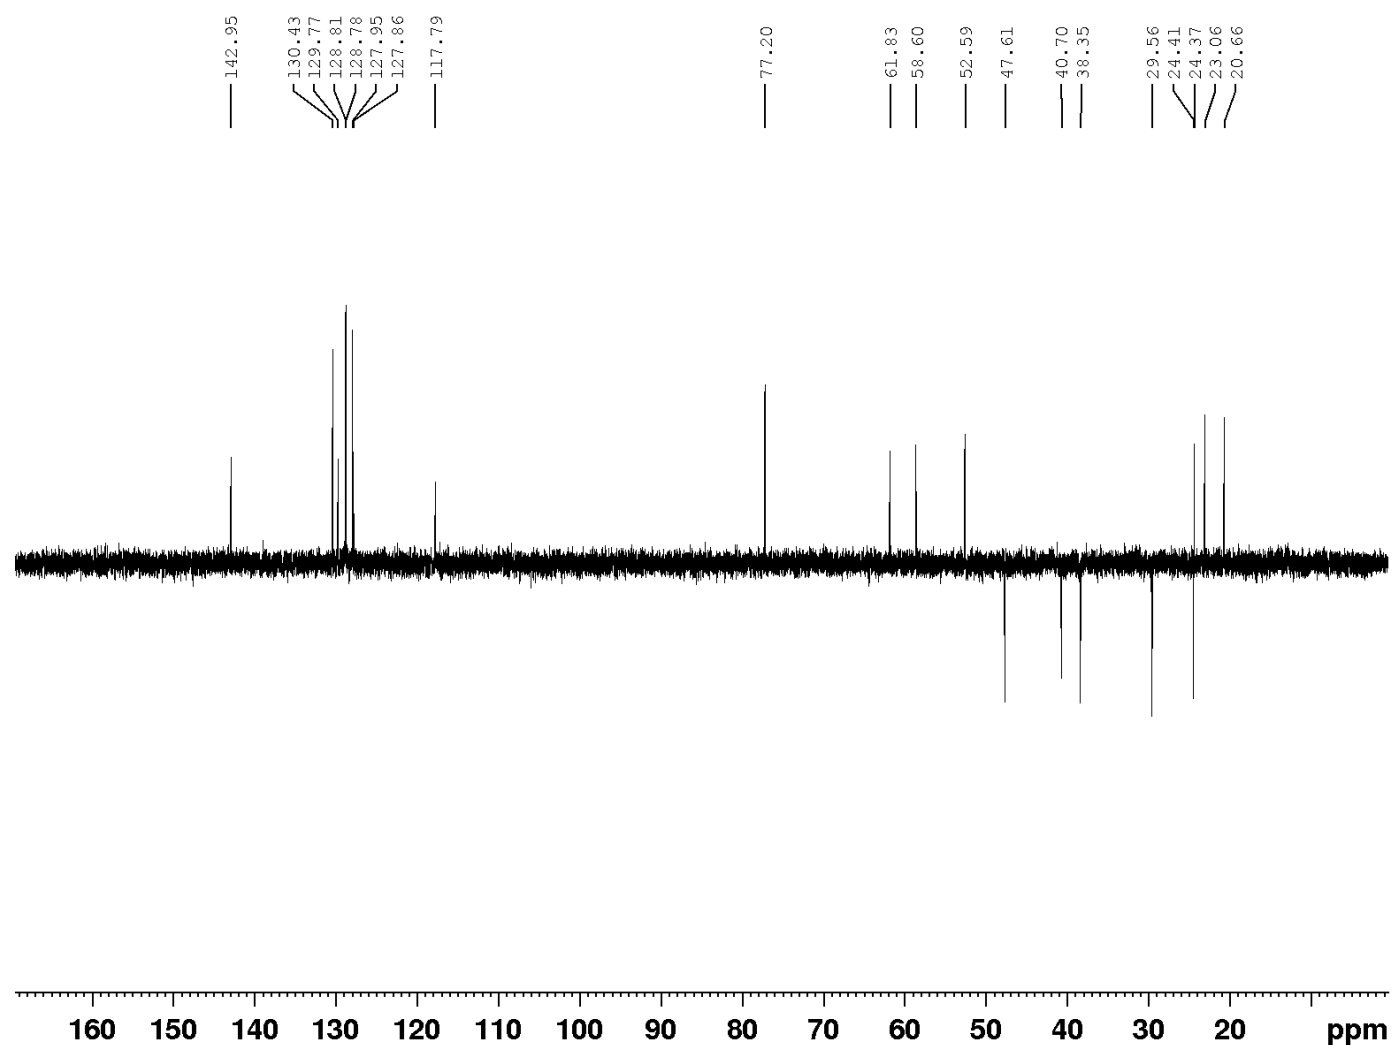

Current Data Parameters  
NAME AT-59h-4  
EXPNO 3135  
PROCNO 1

F2 - Acquisition Parameters  
Date\_ 20191101  
Time 20.50 h  
INSTRUM spect  
PROBHD z112726\_0001 (  
PULPROG deptspl35  
TD 65536  
SOLVENT CDCl3  
NS 1024  
DS 2  
SWH 29761.904 Hz  
FIDRES 0.908261 Hz  
AQ 1.1010048 sec  
RG 203  
DW 16.800 usec  
DE 6.50 usec  
TE 303.4 K  
CNST2 145.000000  
D1 2.00000000 sec  
D2 0.00344828 sec  
D12 0.00002000 sec  
TD0 64  
SFO1 176.0301003 MHz  
NUC1 13C  
P1 10.50 usec  
P13 2000.00 usec  
PLW0 0 W  
PLW1 35.48099899 W  
SPNAM[5] Crp80comp.4  
SPOAL5 0.500  
SPOFFS5 0 Hz  
SPW5 7.96899986 W  
SFO2 700.0028000 MHz  
NUC2 1H  
CPDPRG[2] waltz16  
P3 13.30 usec  
P4 26.60 usec  
PCPD2 70.00 usec  
PLW2 39.81100082 W  
PLW12 1.43719995 W

F2 - Processing parameters  
SI 65536  
SF 176.0151418 MHz  
WDW EM  
SSB 0  
LB 1.00 Hz  
GB 0  
PC 1.40



Figure S12. HSQC spectrum of asterriptide B (2)

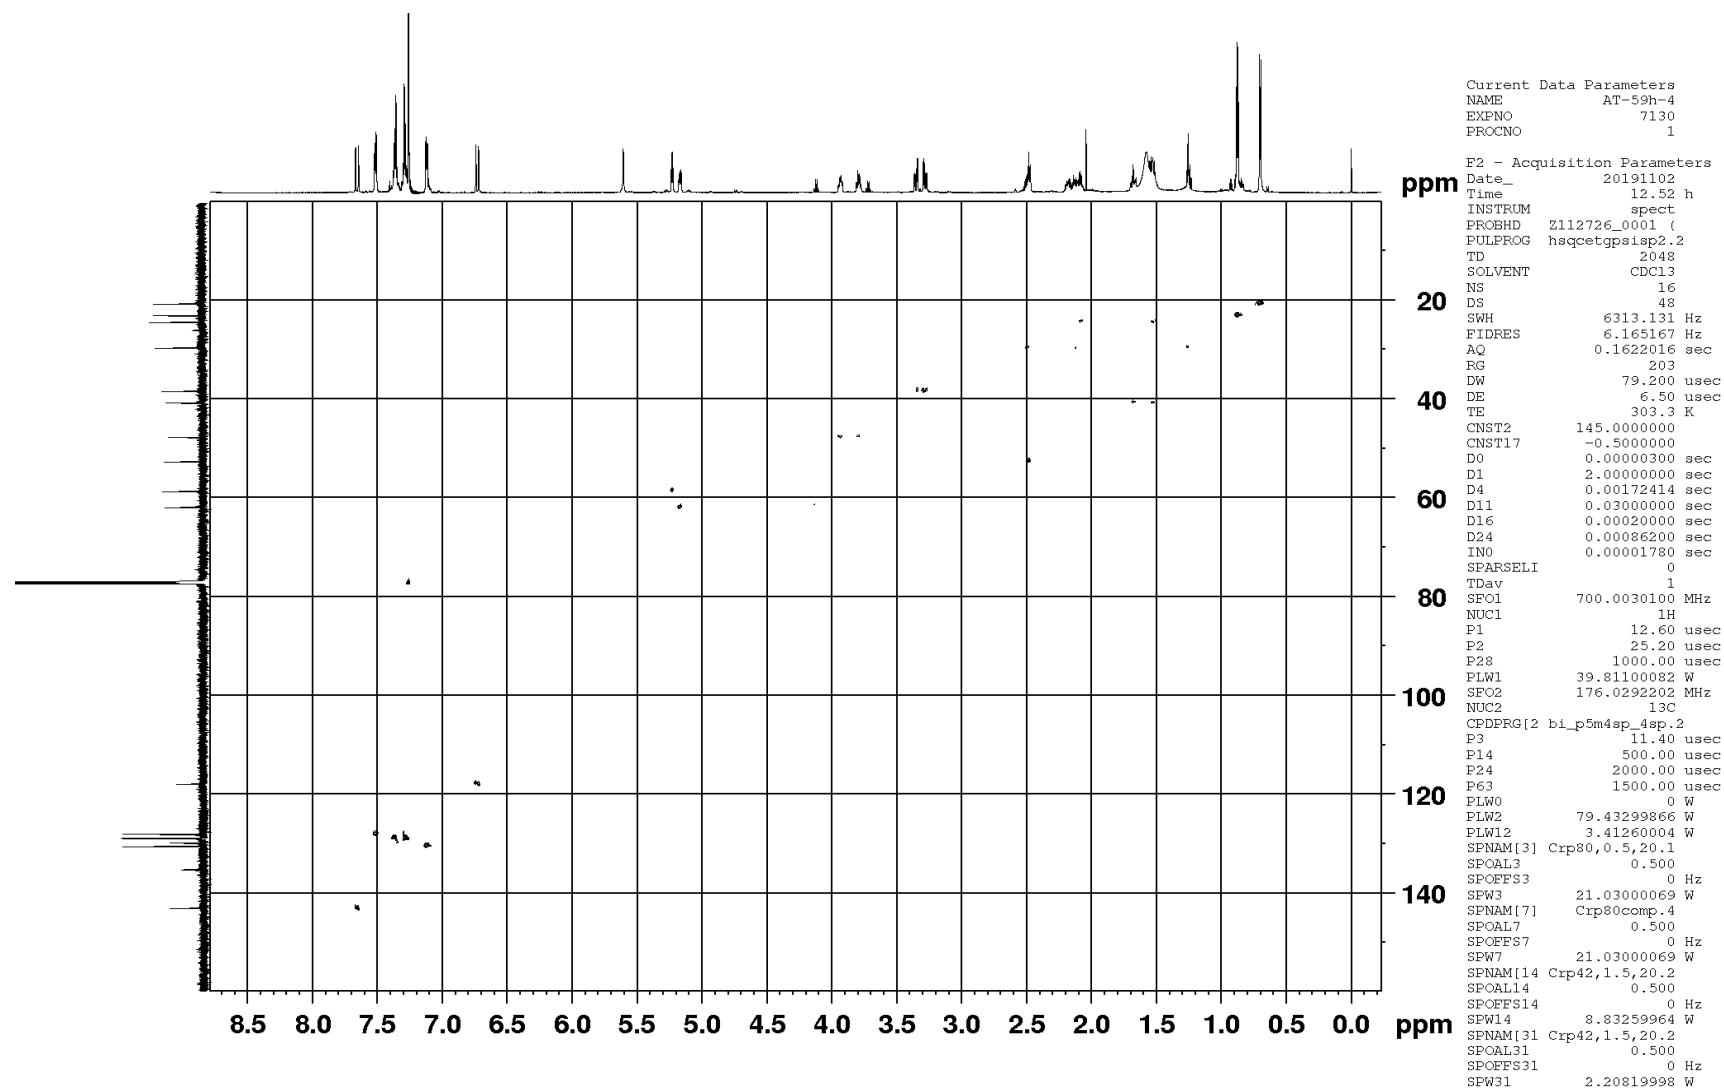

Figure S13. HMBC spectrum of asterriptide B (2)

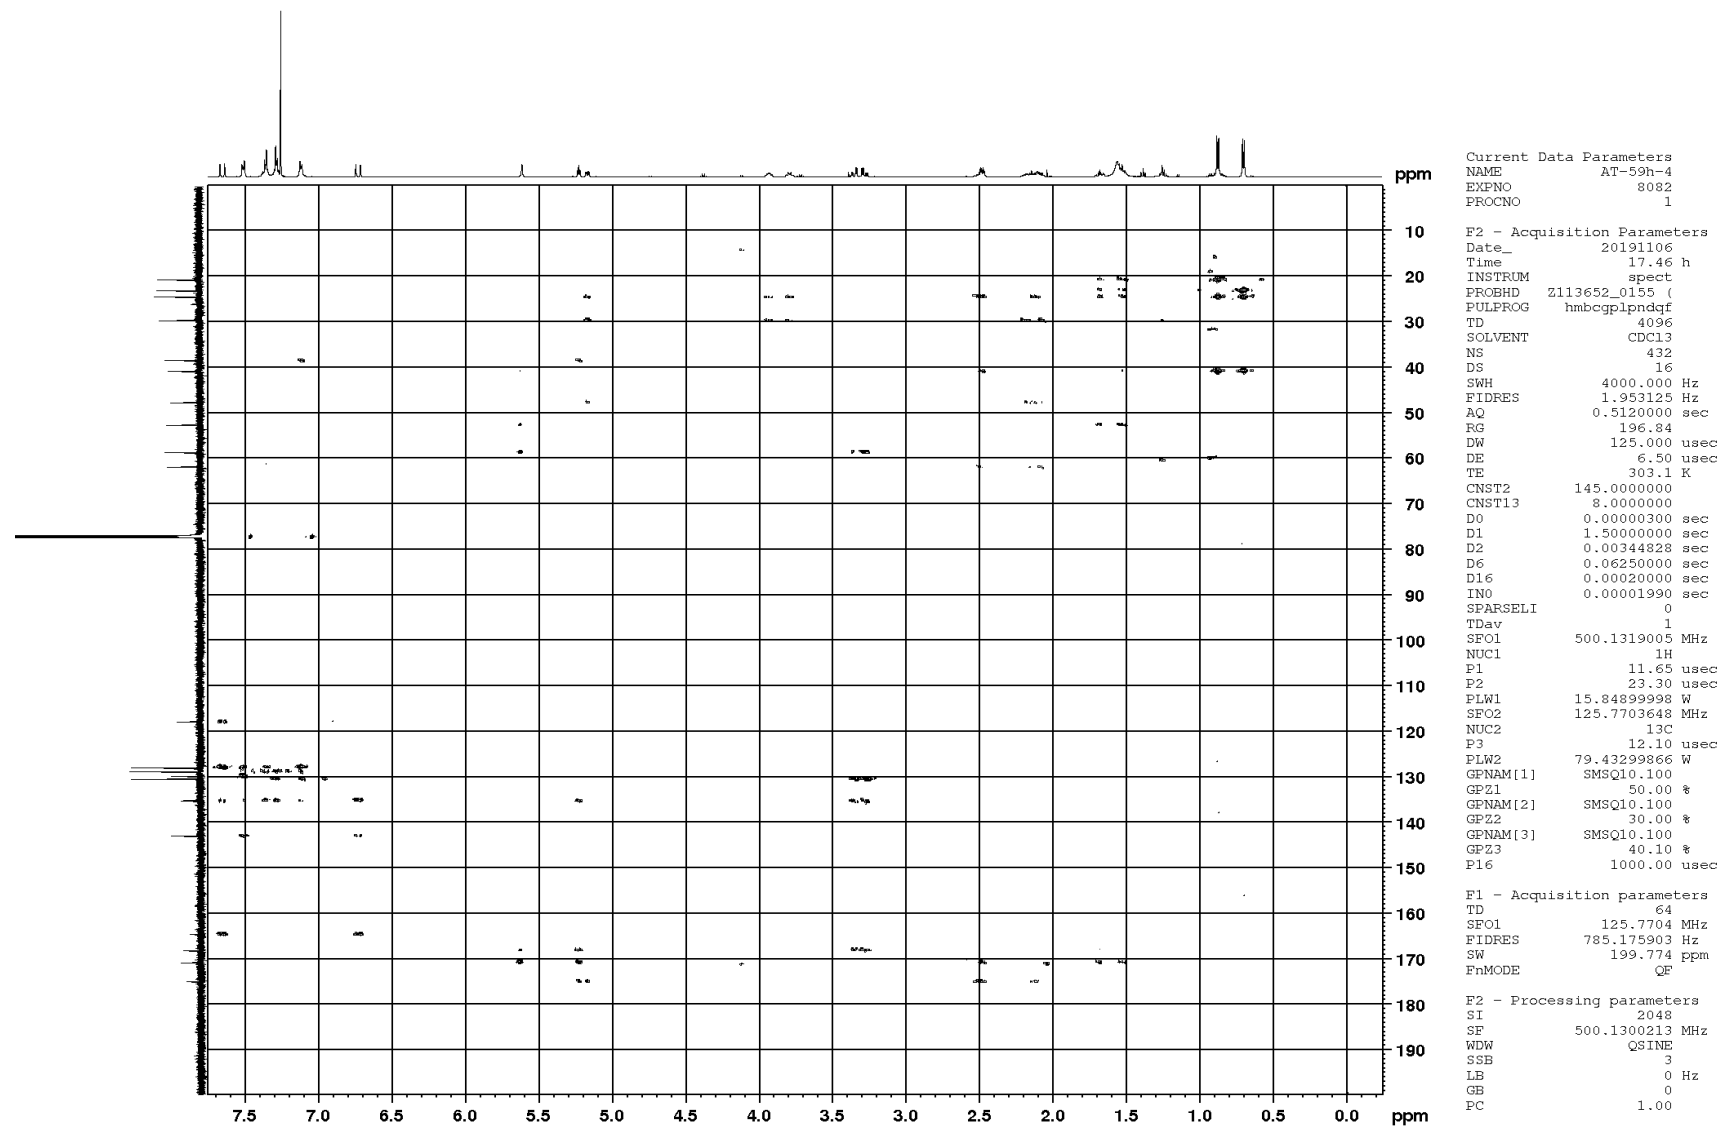

Figure S14.  $^1\text{H}$ - $^1\text{H}$  COSY spectrum of asterriptide B (2)

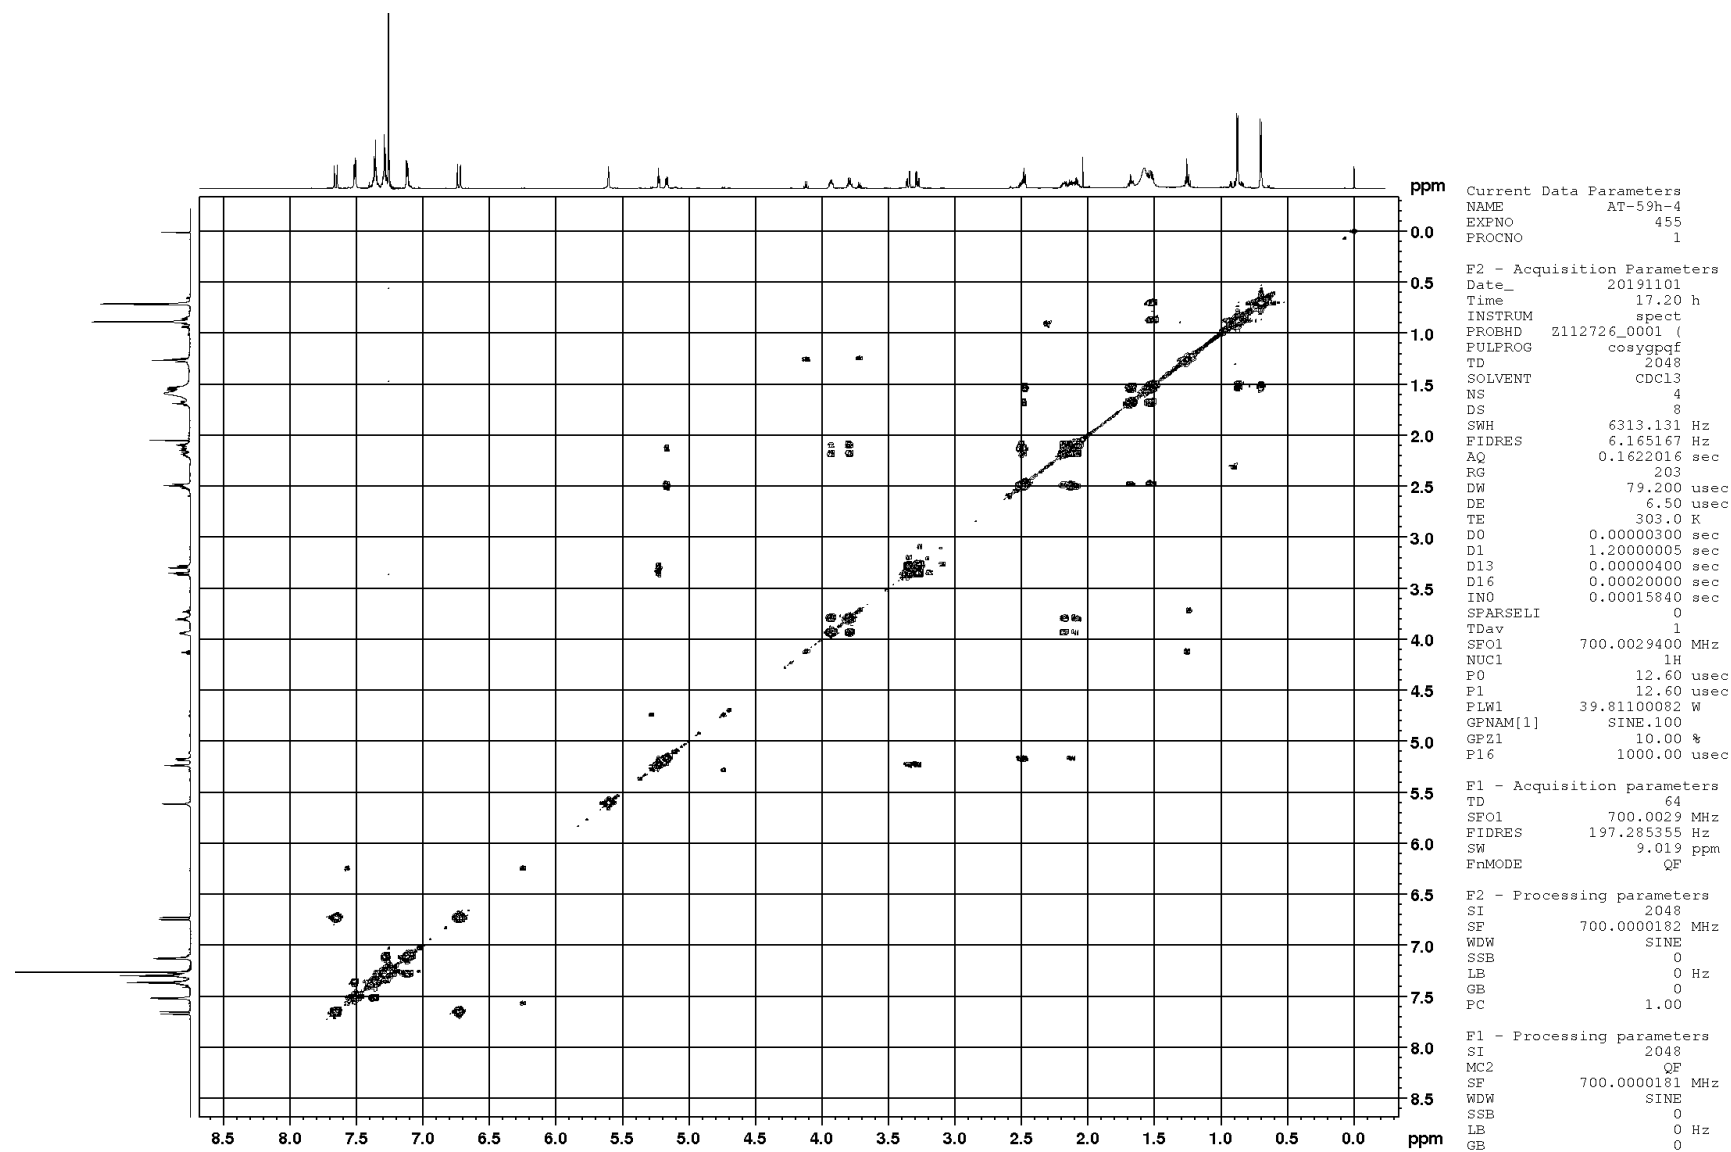

Figure S15. NOESY spectrum of asterriptide B (2)

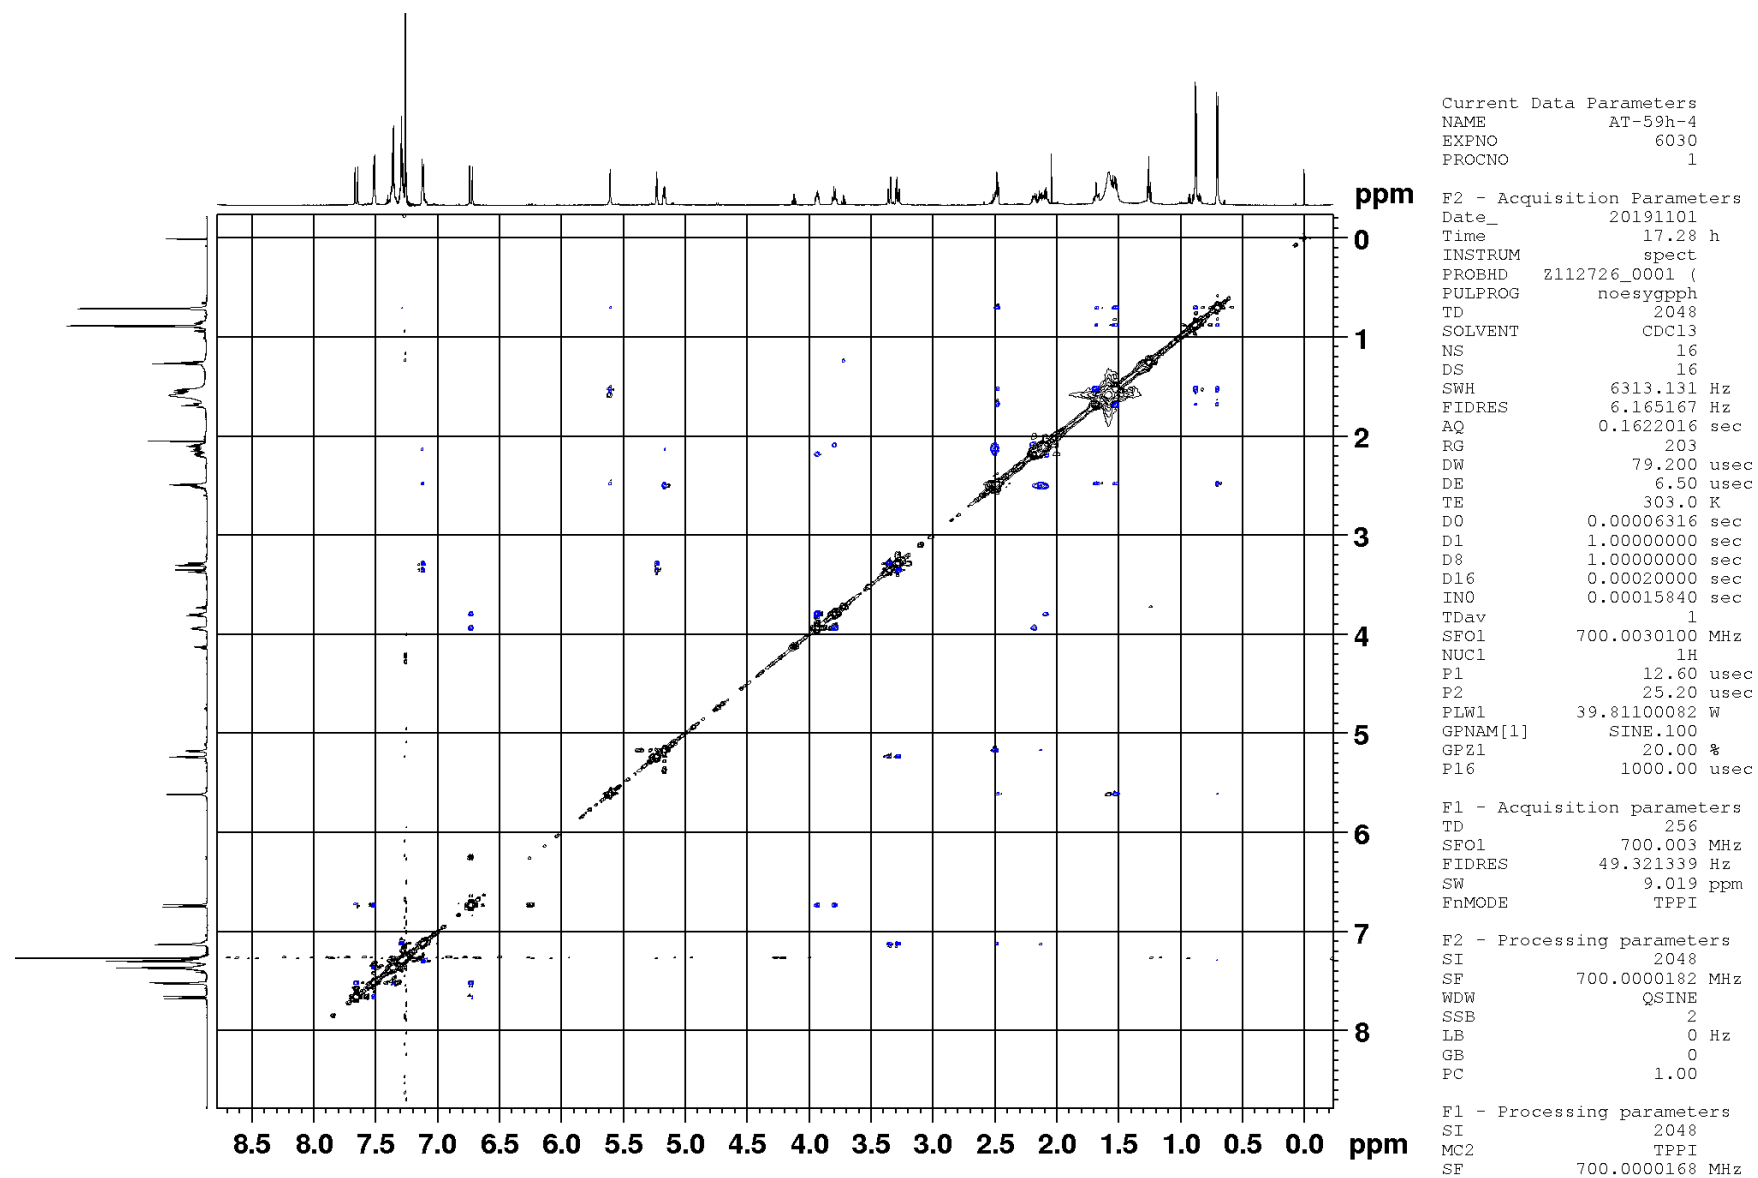

**Figure S16. MS and MS/MS data of asterriptide B (2)**

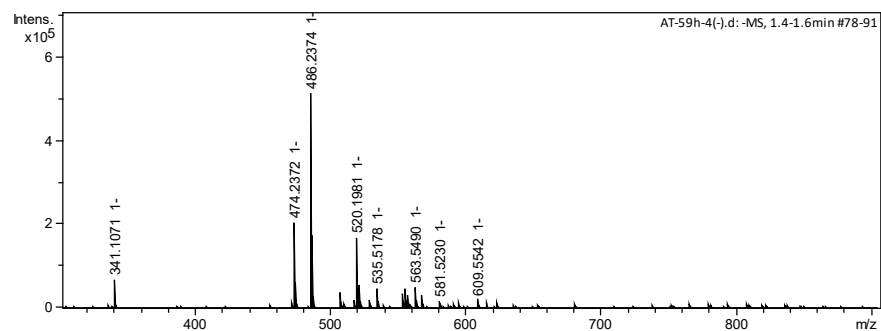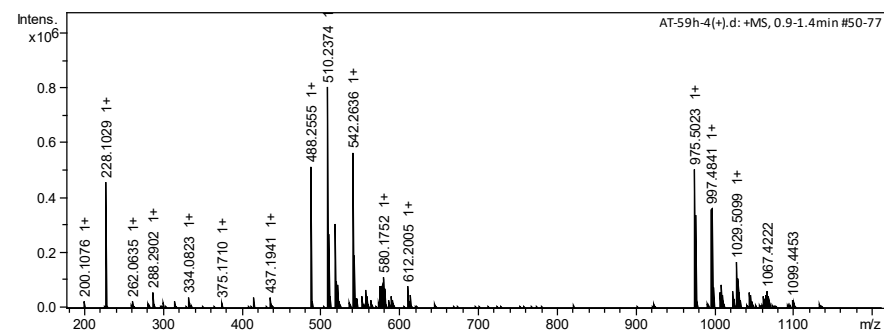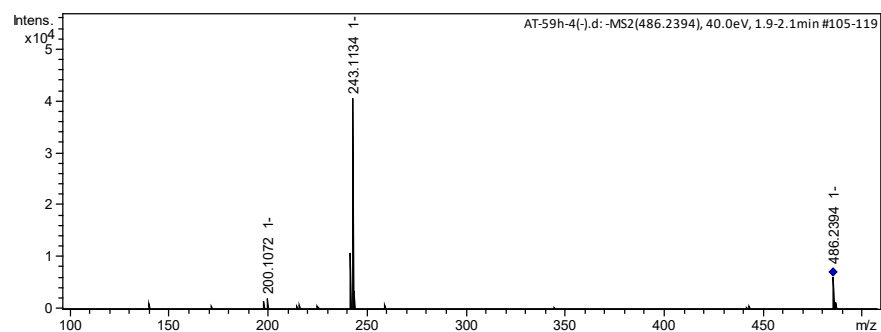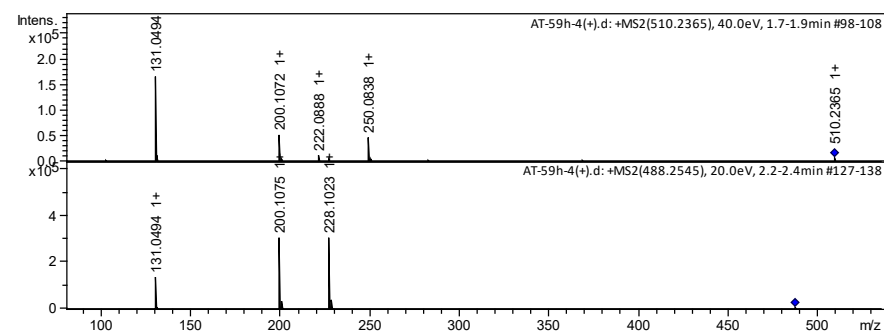

|                     | meas.    | calc.    | $\Delta$ (ppm) |
|---------------------|----------|----------|----------------|
| [M-H] <sup>-</sup>  | 486,2374 | 486,2398 | 5,1            |
| [M+Na] <sup>+</sup> | 510,2374 | 510,2363 | -2,1           |

Figure S17.  $^1\text{H}$  NMR spectrum of asterriptide C (3)

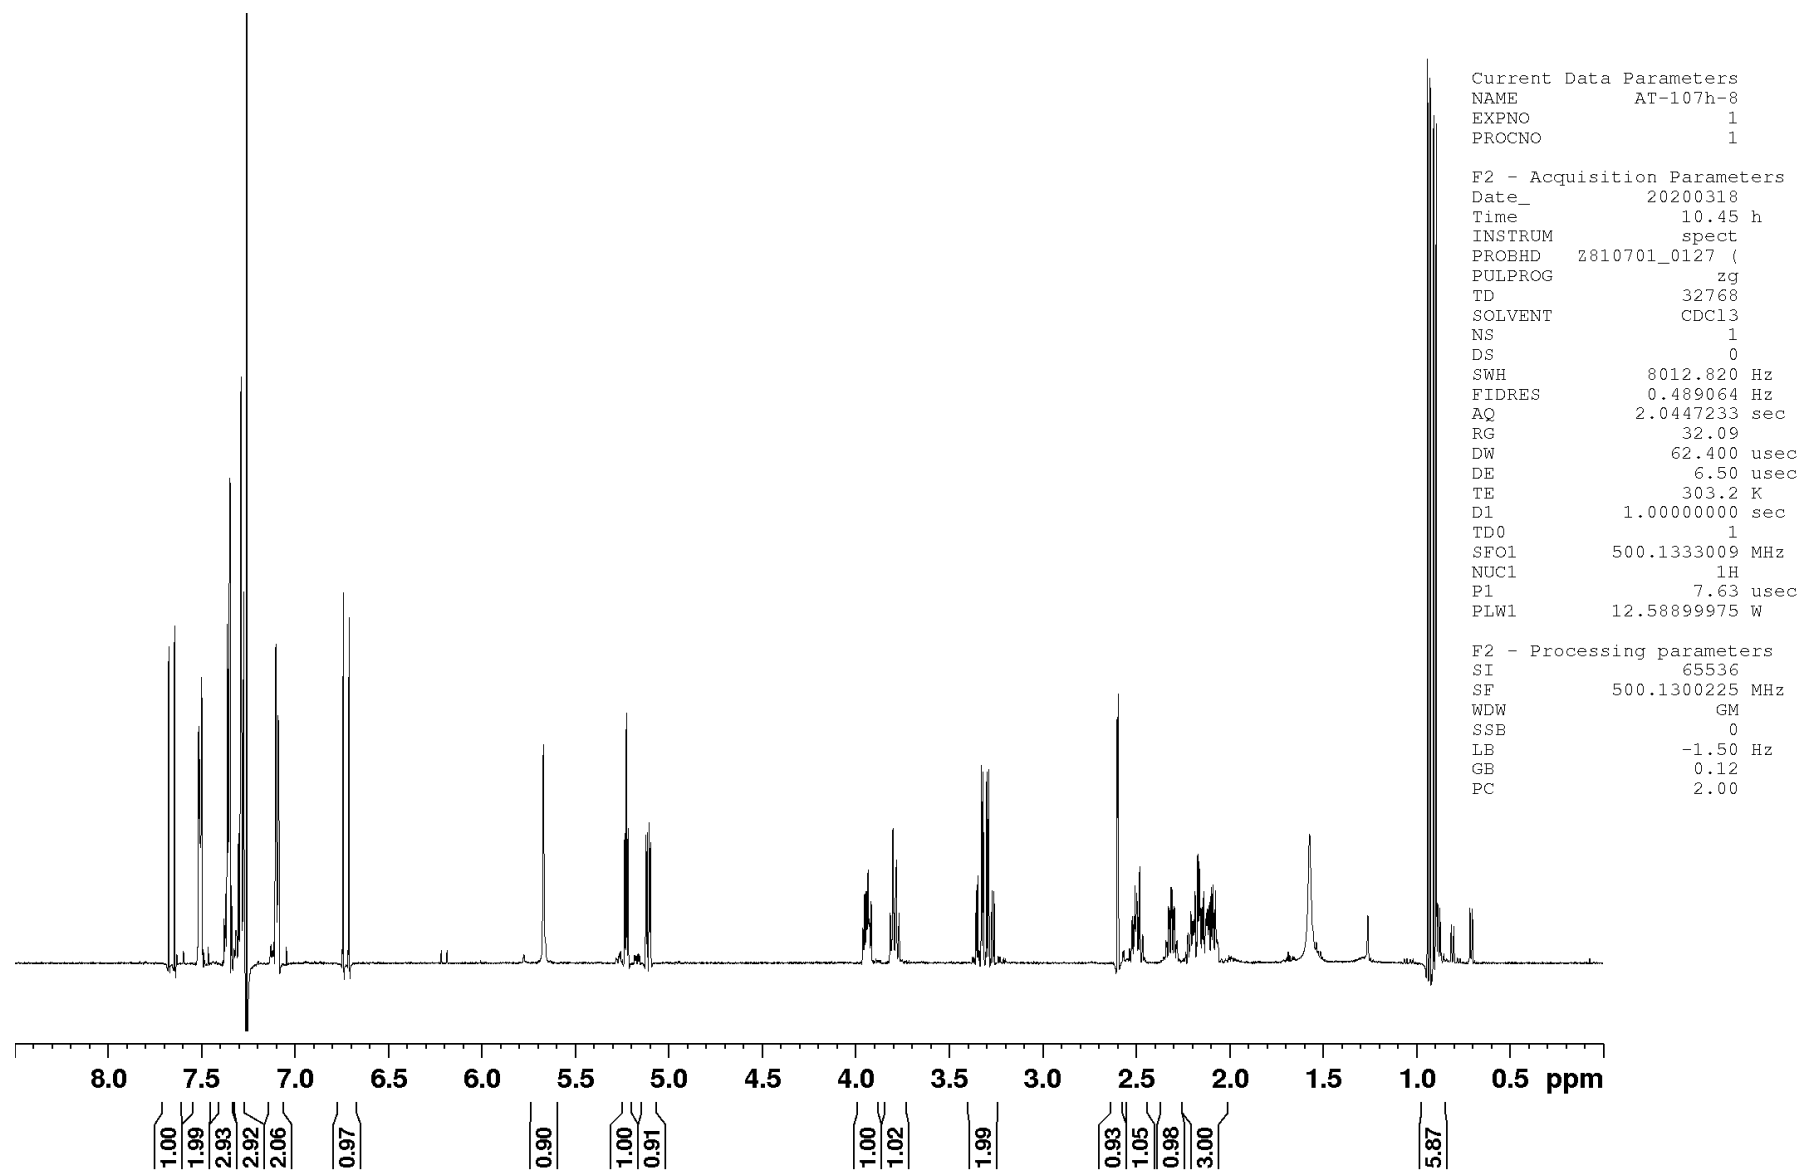

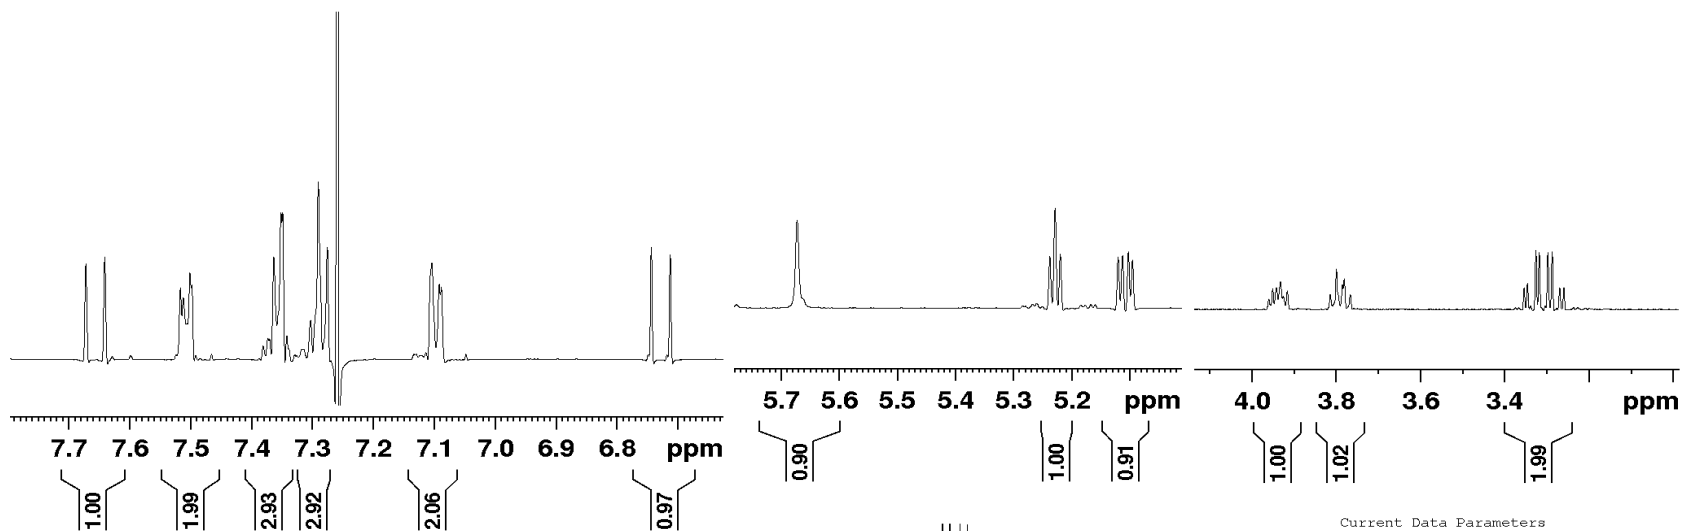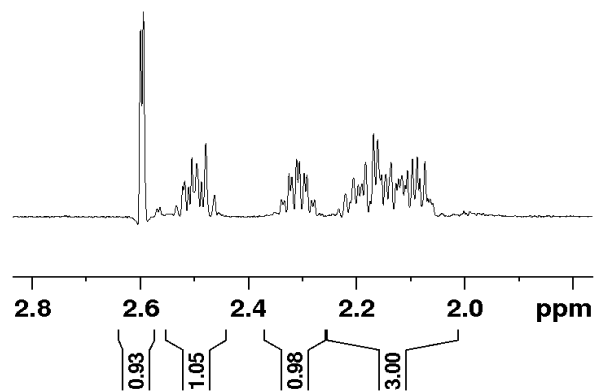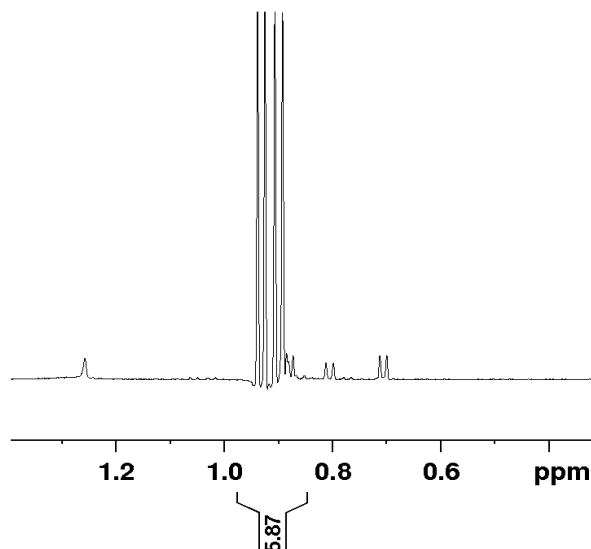

Current Data Parameters  
NAME AT-107h-8  
EXPNO 1  
PROCNO 1

F2 - Acquisition Parameters  
Date\_ 20200318  
Time 10.45 h  
INSTRUM spect  
PROBHD Z810701\_0127 (   
PULPROG zg  
TD 32768  
SOLVENT CDCl3  
NS 1  
DS 0  
SWH 8012.820 Hz  
FIDRES 0.489064 Hz  
AQ 2.0447233 sec  
RG 32.09  
DW 62.400 usec  
DE 6.50 usec  
TE 303.2 K  
D1 1.00000000 sec  
TD0 1  
SFO1 500.1333009 MHz  
NUC1 1H  
P1 7.63 usec  
PLW1 12.58899975 W

F2 - Processing parameters  
SI 65536  
SF 500.1300225 MHz  
WDW GM  
SSB 0  
LB -1.50 Hz  
GB 0.12  
PC 2.00

Figure S18.  $^{13}\text{C}$  NMR spectrum of asterripeptide C (3)

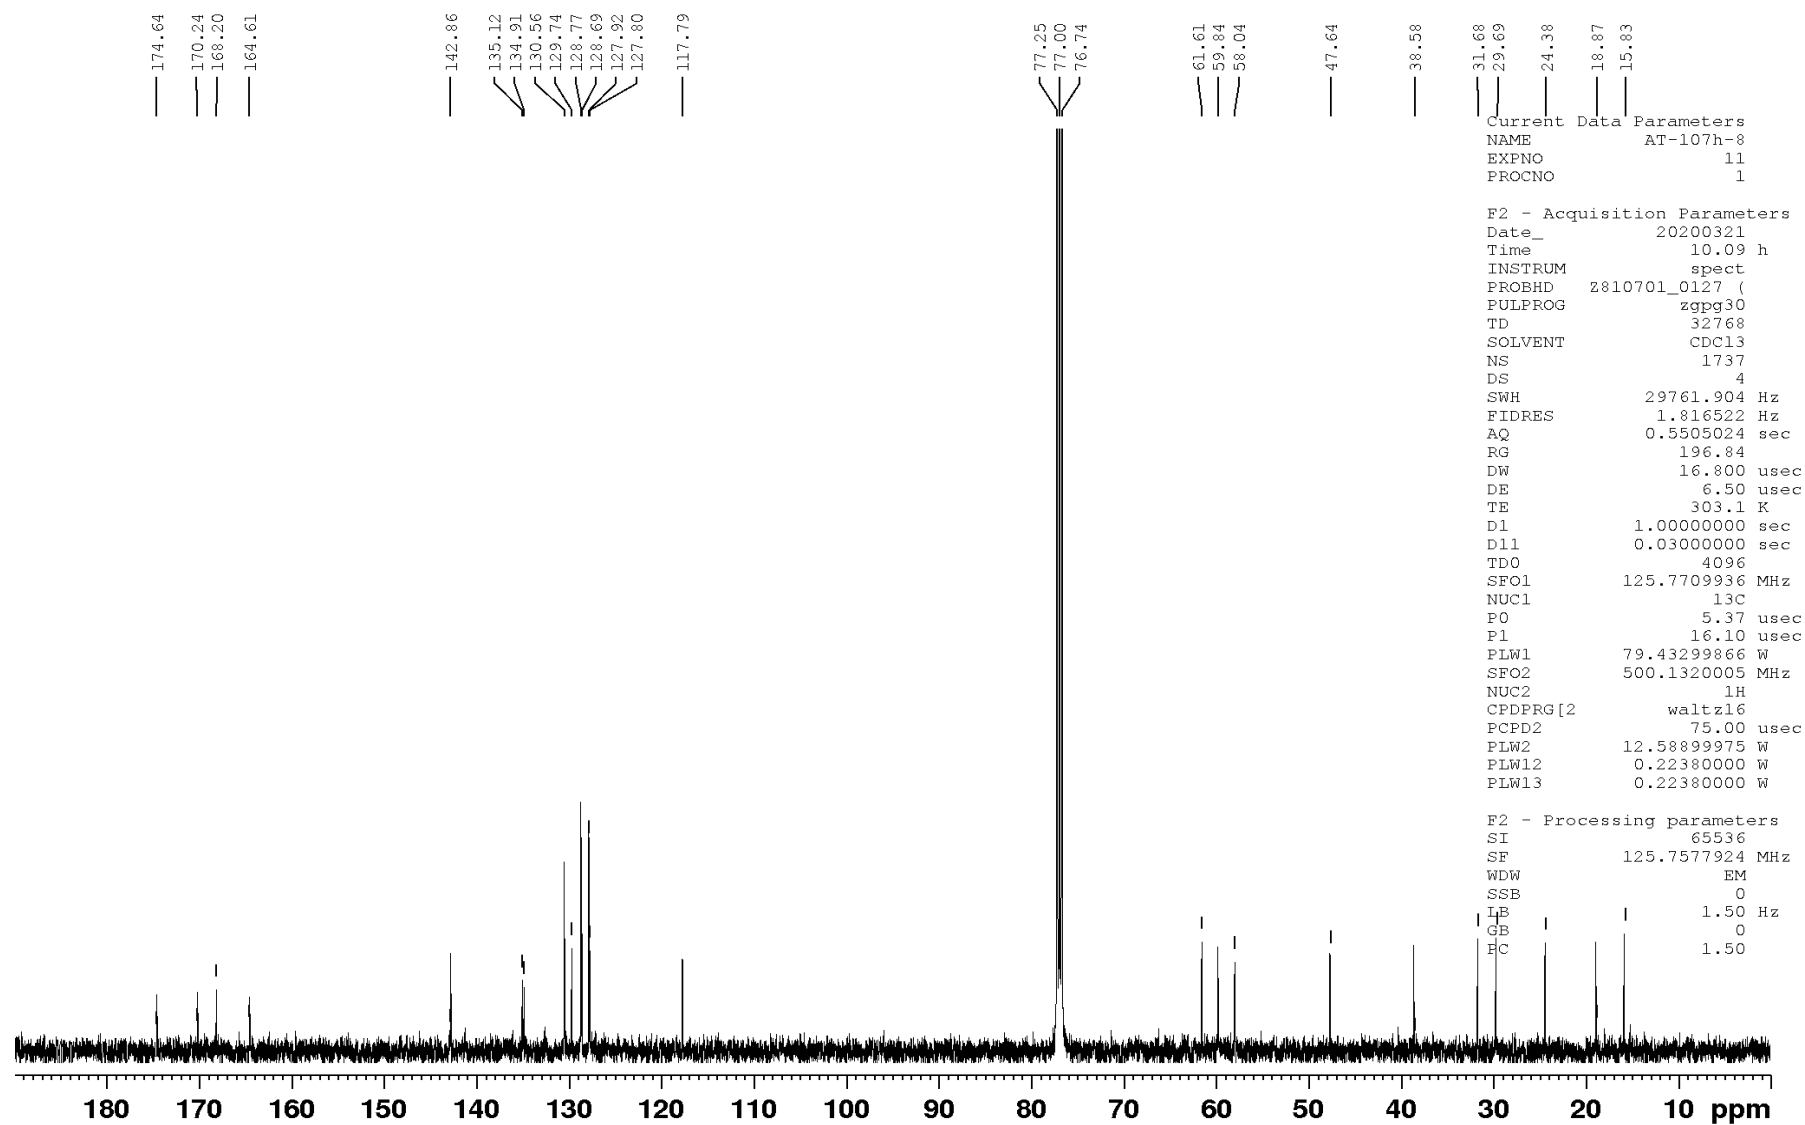



Figure S19. DEPT NMR spectrum of asterriptide C (3)

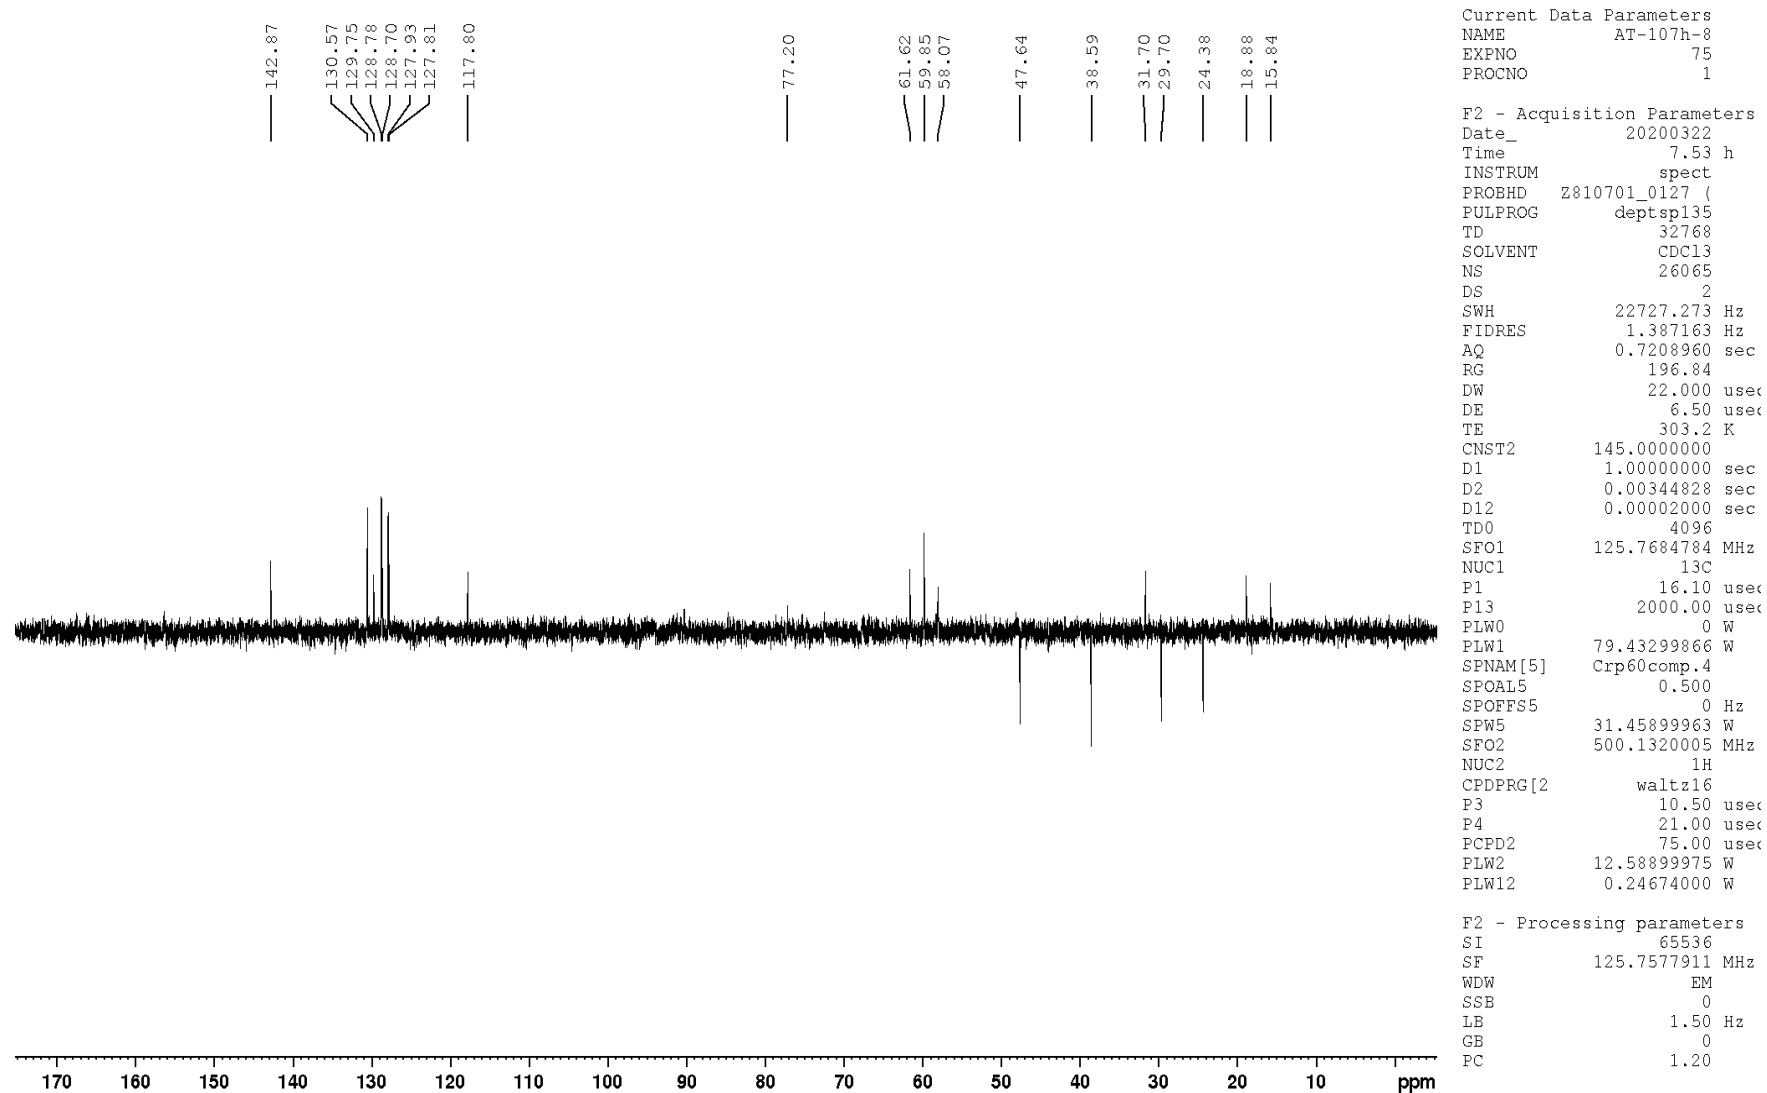

Figure S20. HSQC NMR spectrum of asterriptide C (3)

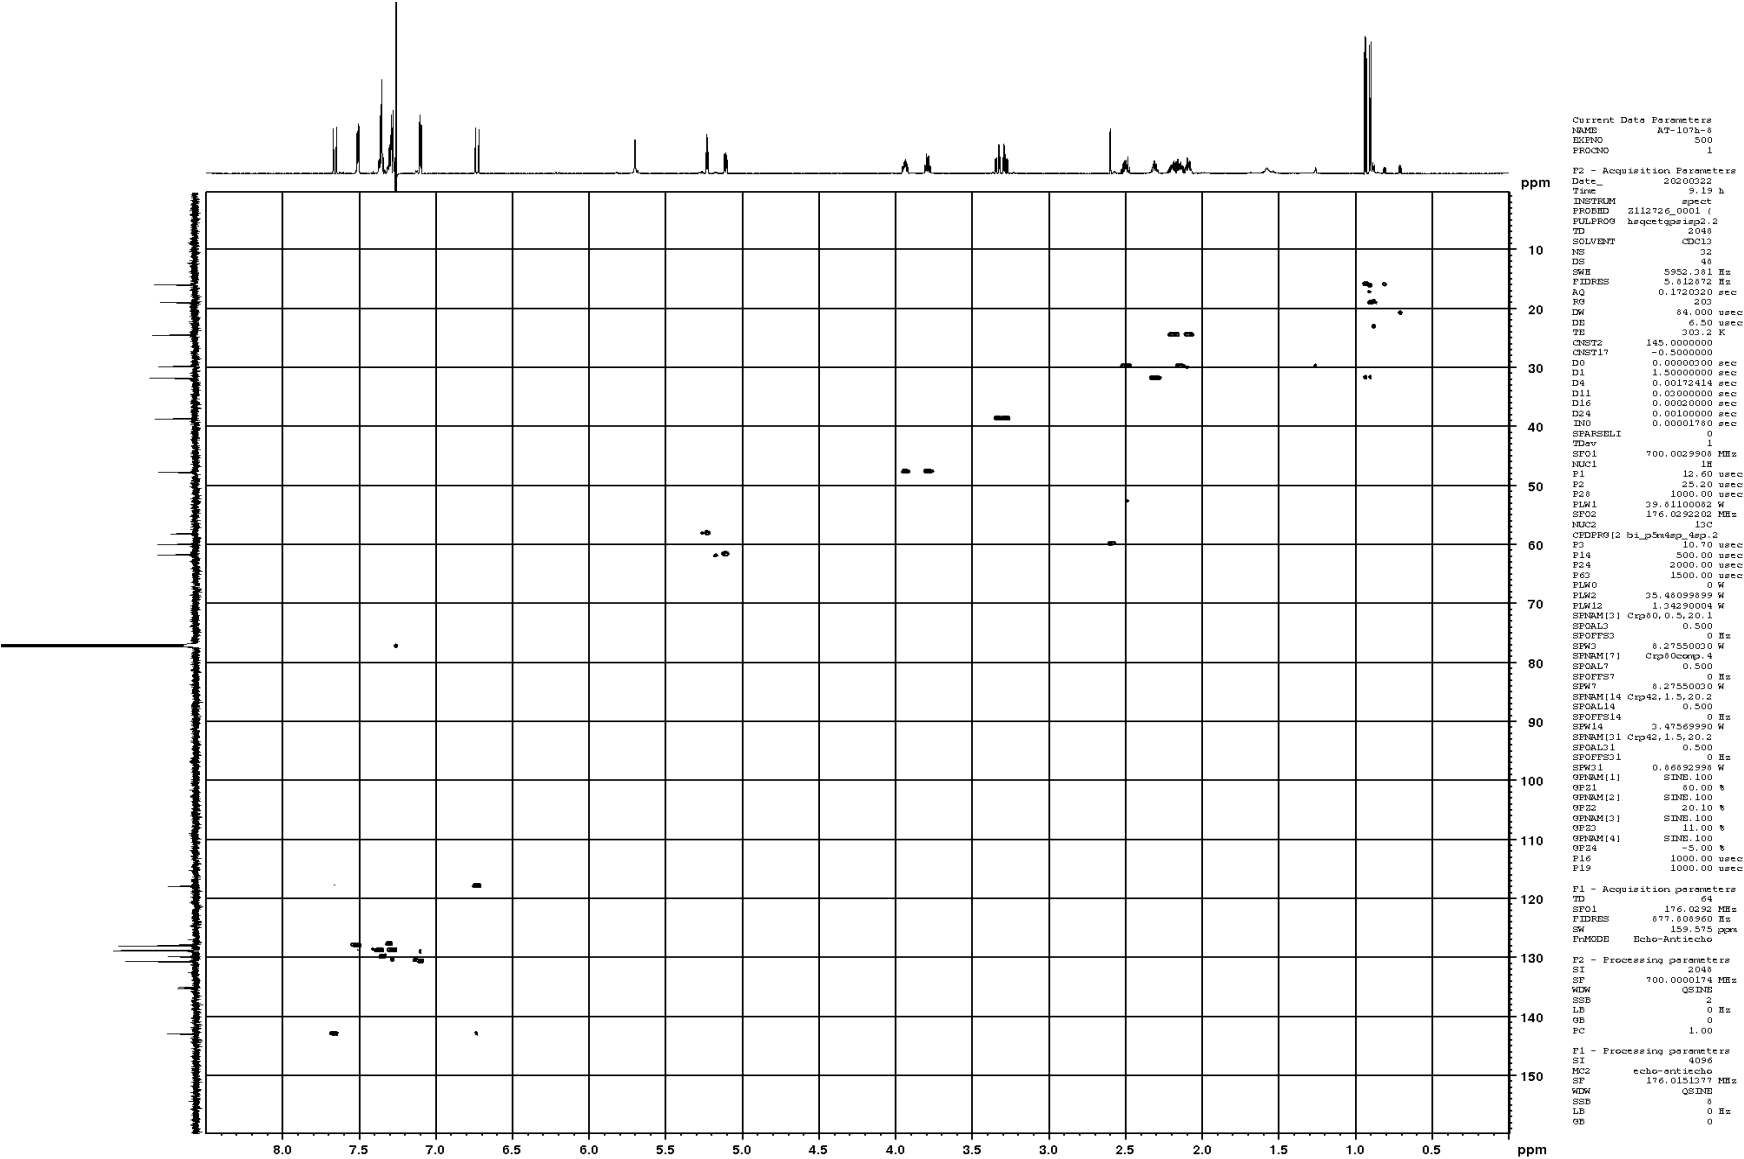

Figure S21. HMBC NMR spectrum of asterriptide C (3)

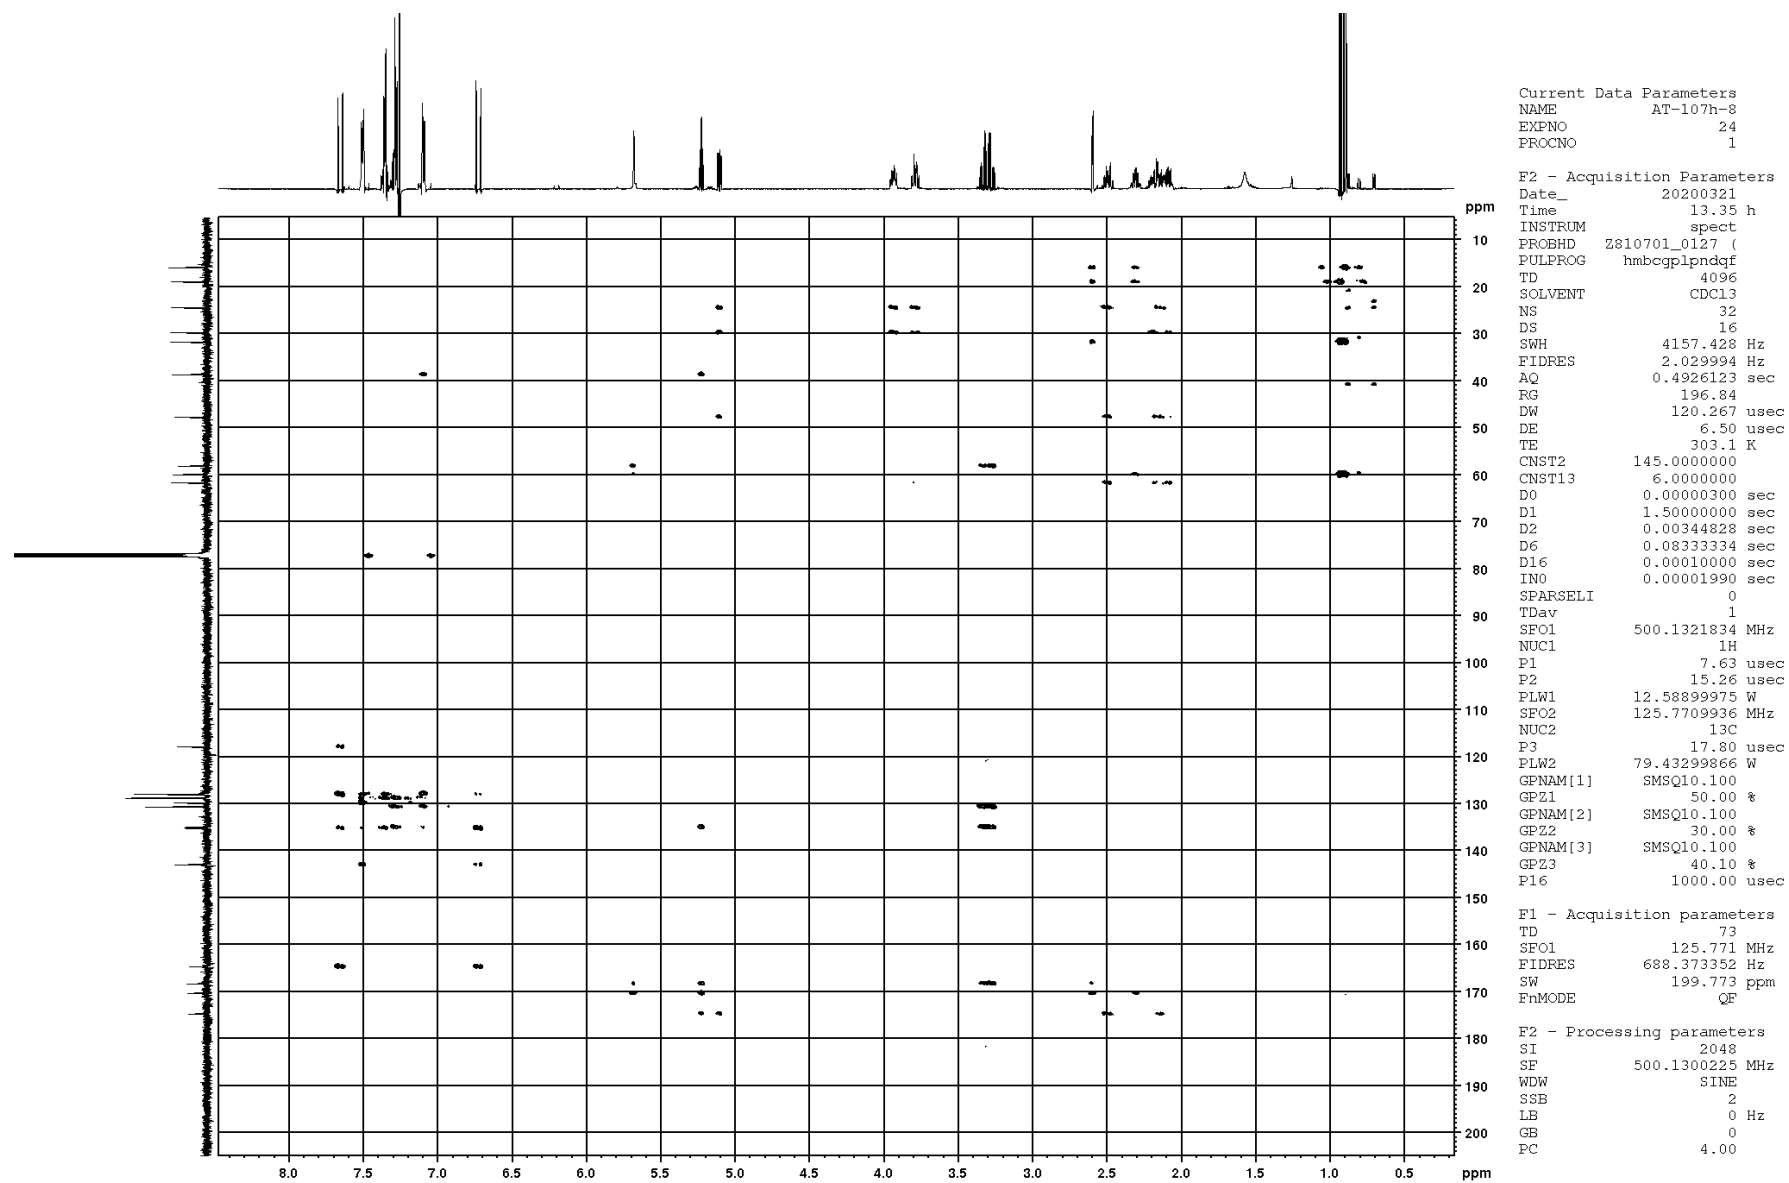

Figure S22.  $^1\text{H}$ - $^1\text{H}$  COSY NMR spectrum of asterriptide C (3)

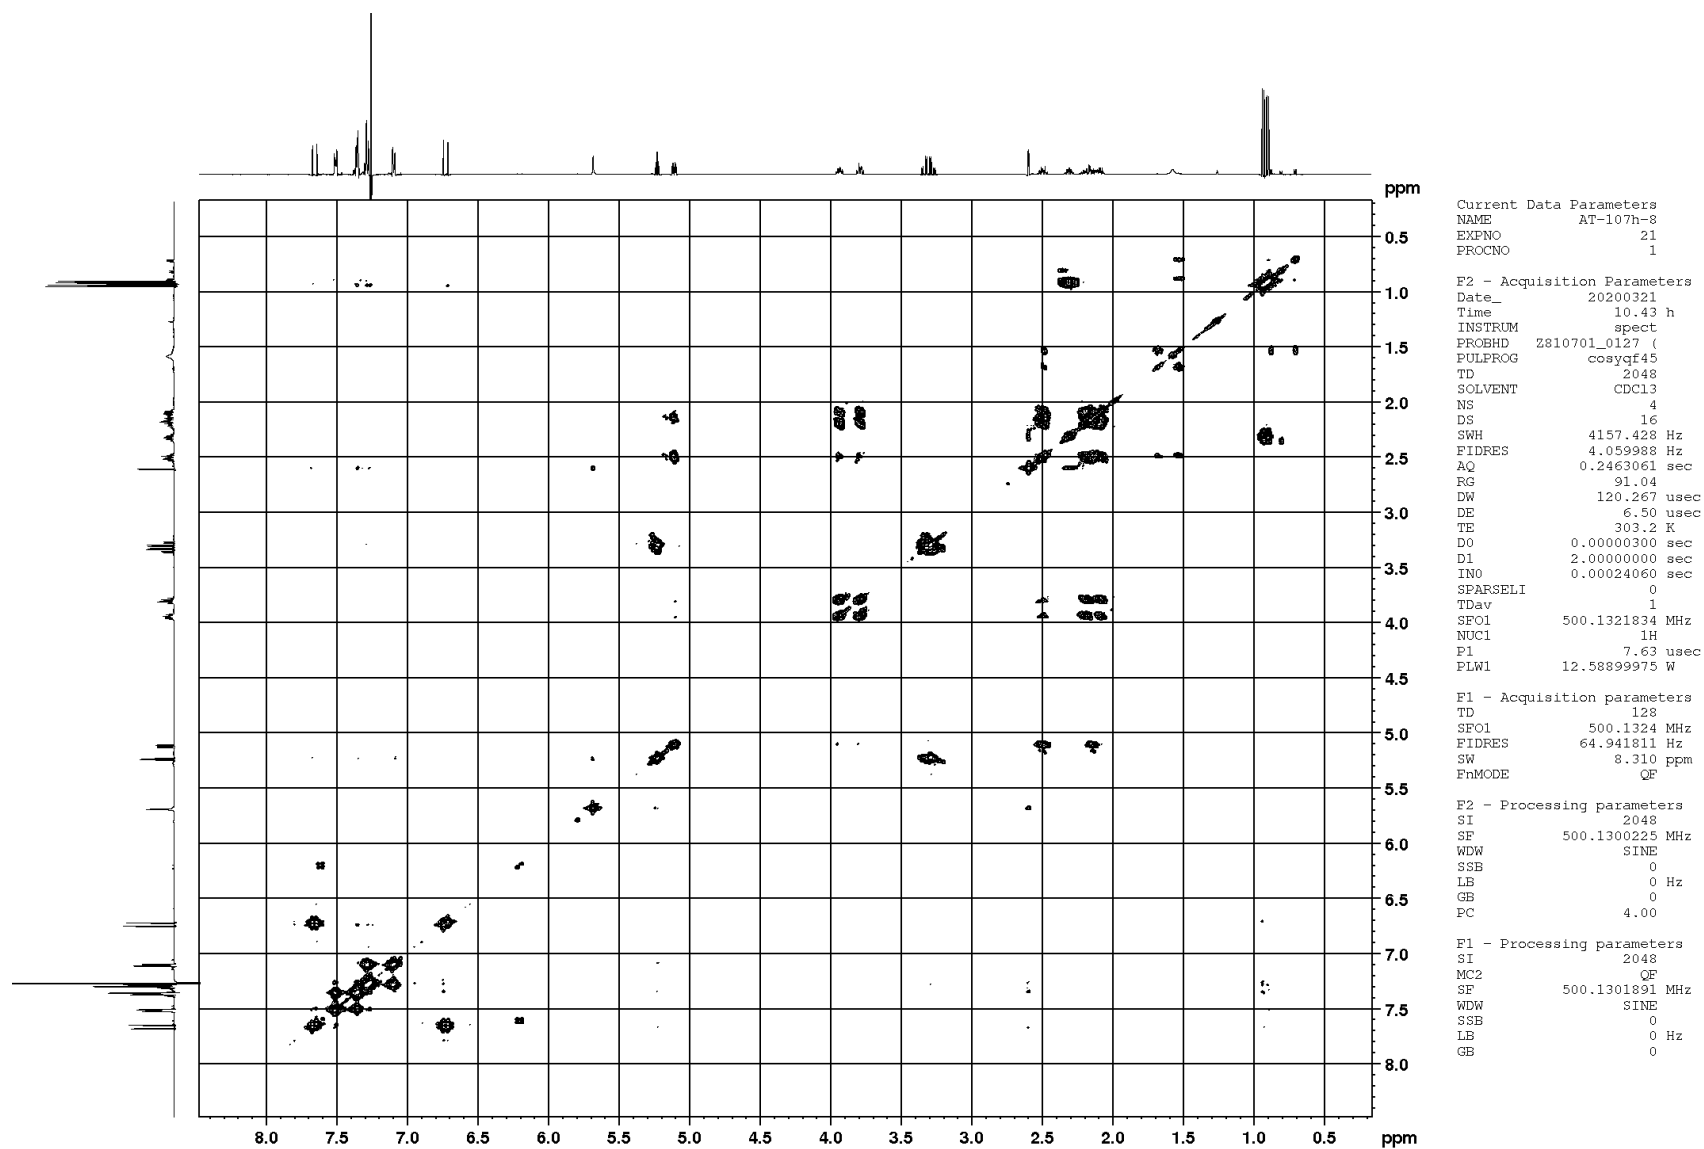

Figure S23. ROESY NMR spectrum of asterripeptide C (3)

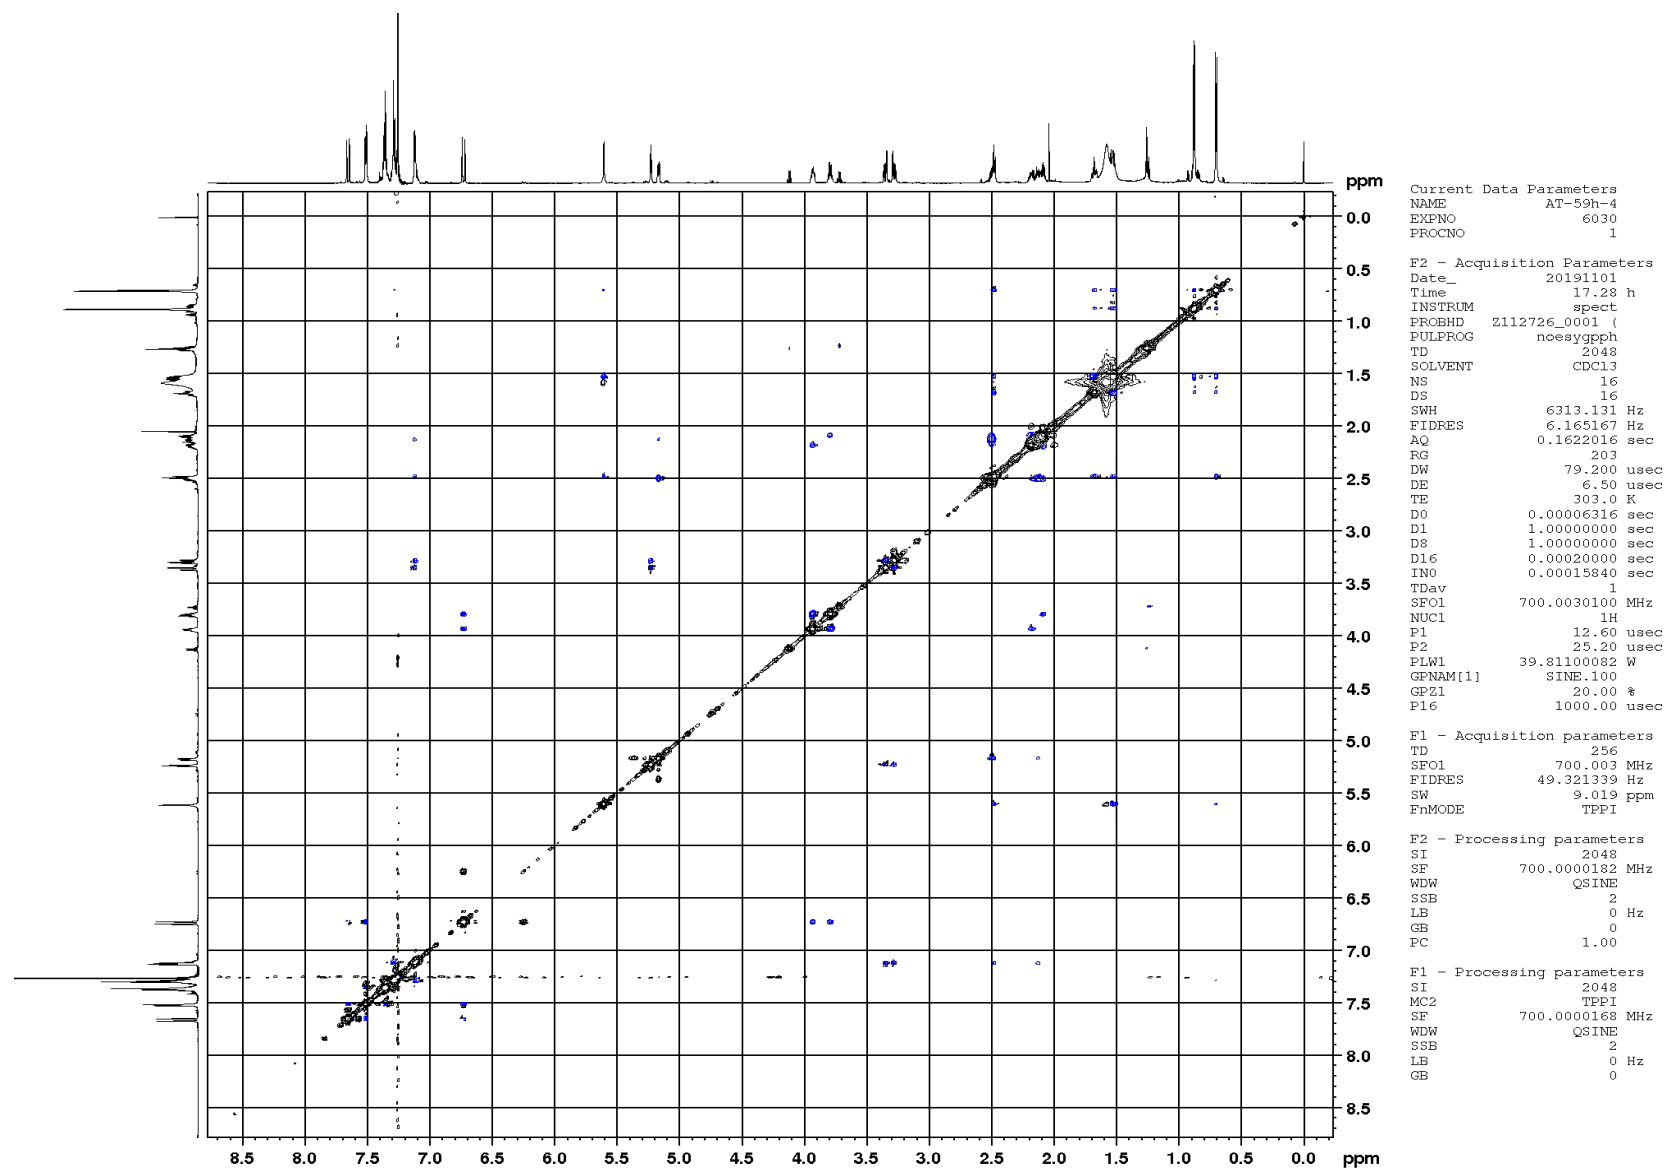

Figure S24. MS and MS/MS data of asterriptide C (3)

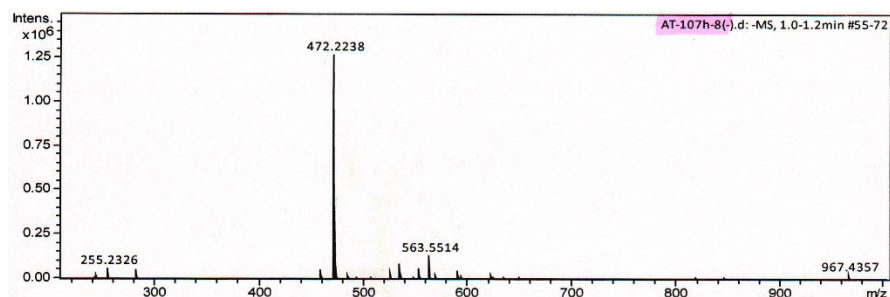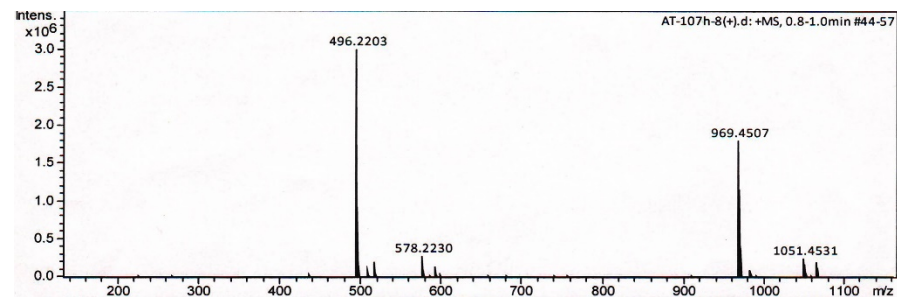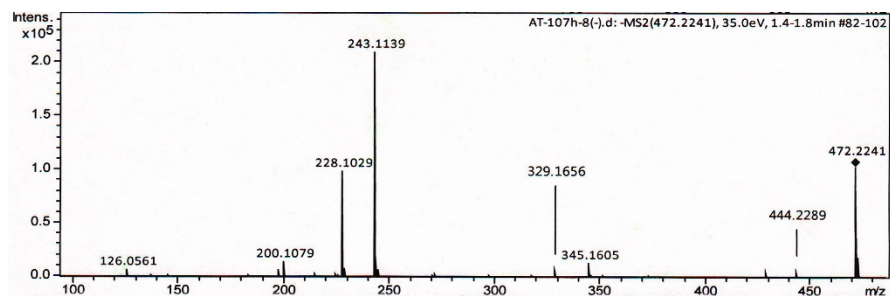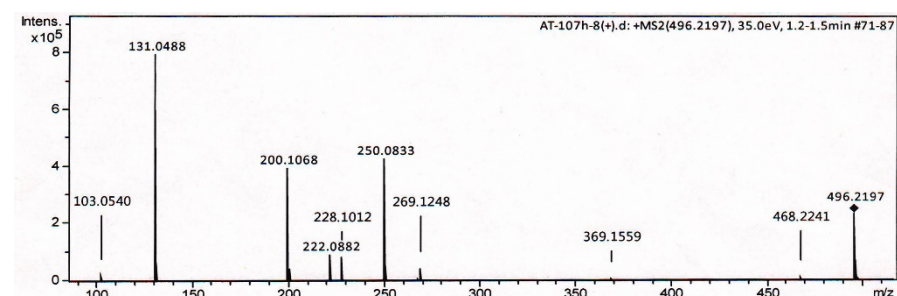

|                     | meas.    | calc.    | $\Delta$ (ppm) |
|---------------------|----------|----------|----------------|
| [M-H] <sup>-</sup>  | 472.2238 | 472.2242 | 0.7            |
| [M+Na] <sup>+</sup> | 496.2203 | 496.2207 | 0.8            |

Figure S25. HPLC profile of *L*-FDAA-derivatives of asterriptide A (1) hydrolysis products (HP)

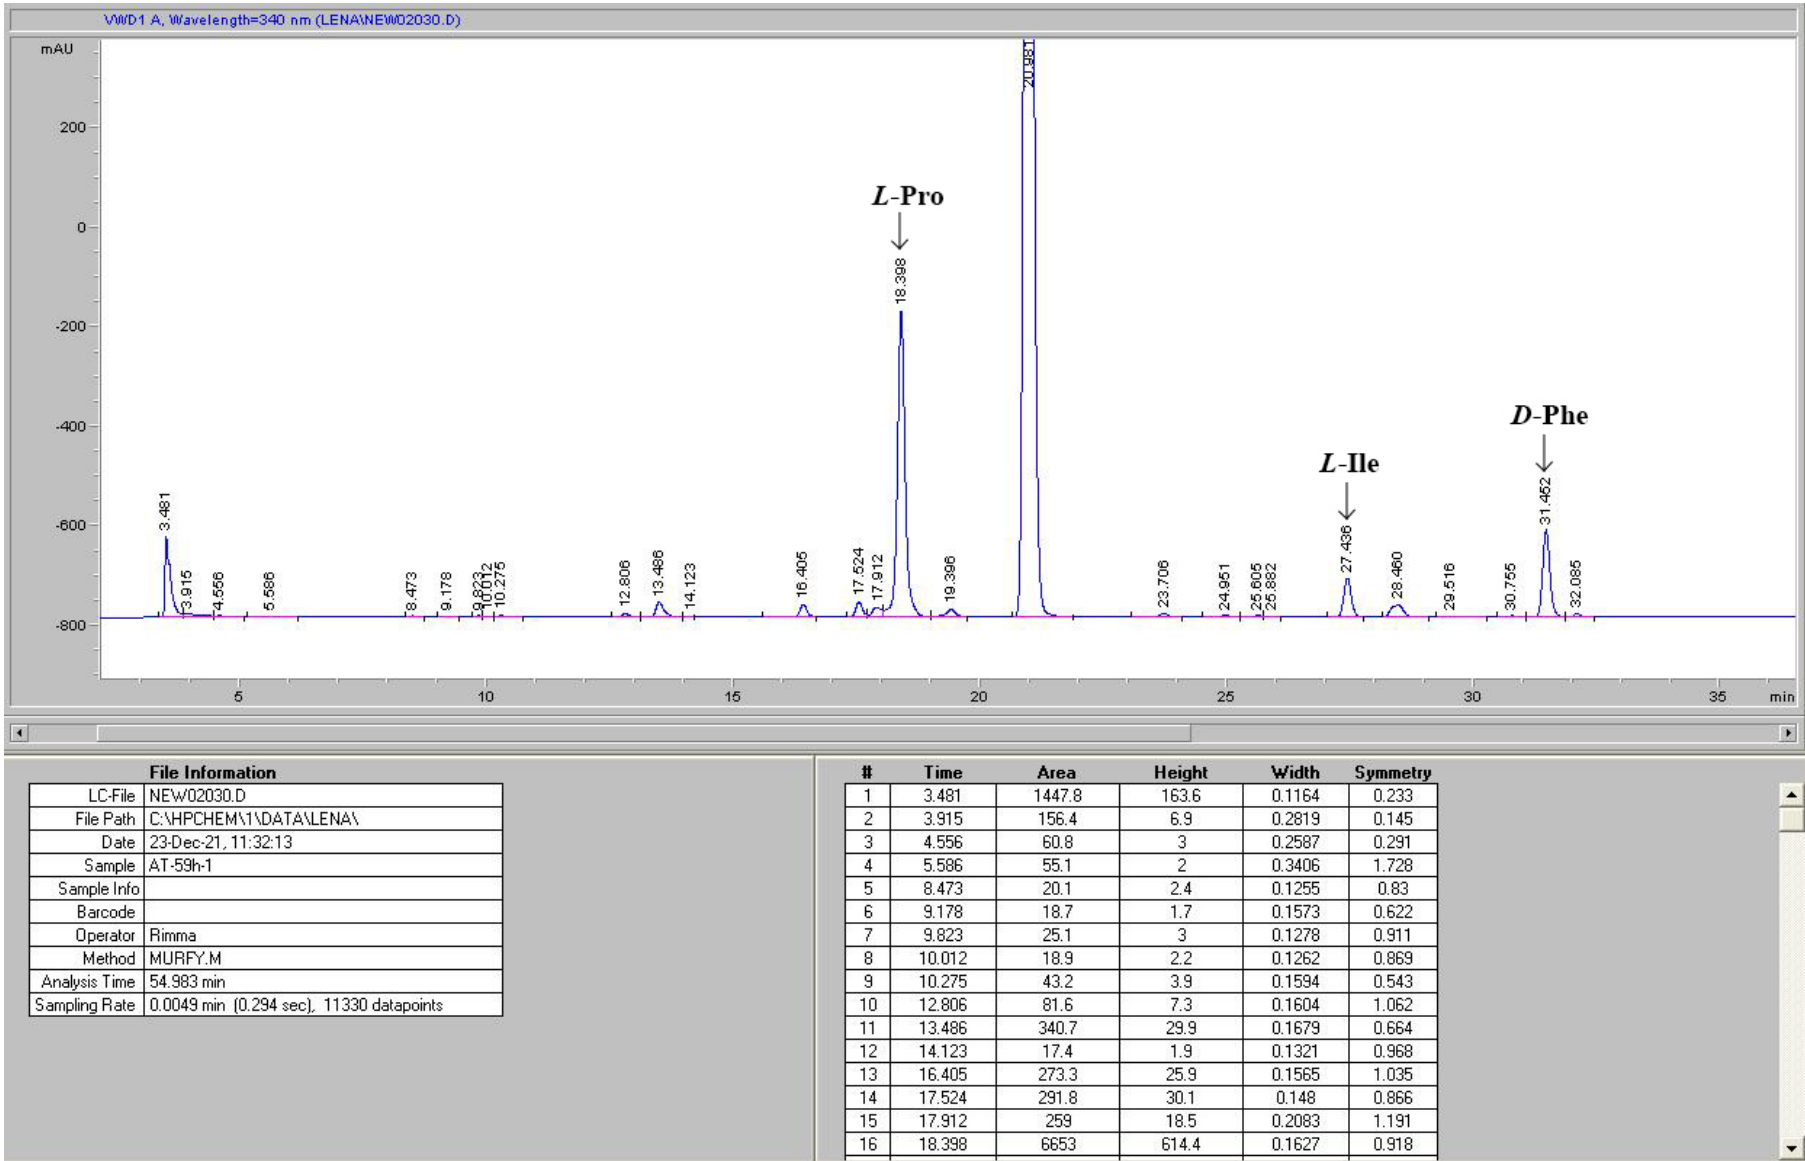

Figure S26. HPLC profile of *L*-FDAA-derivatives of asterriptide A (1) HP (a), asterriptide A HP+*L*-Ile (b) and asterriptide A HP+*D,L*-Ile (c)

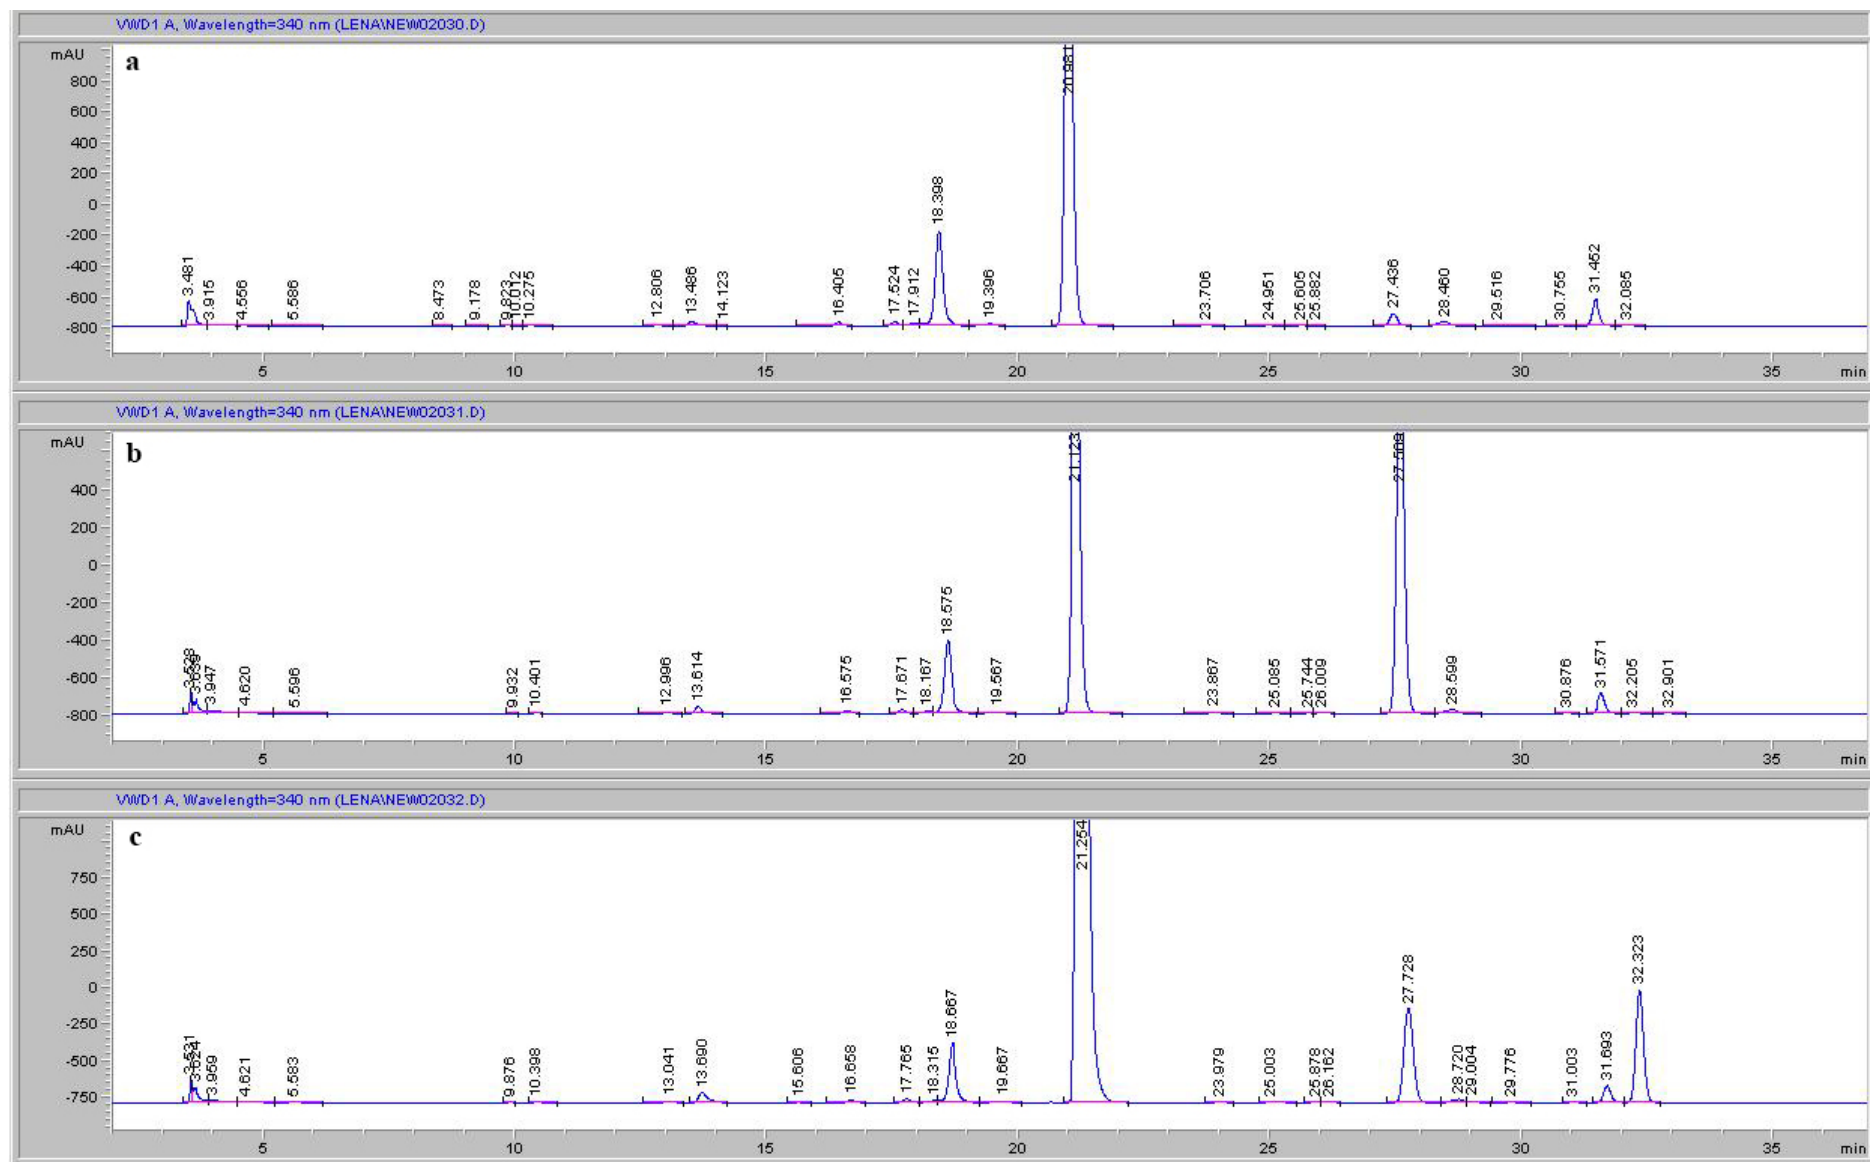



Figure S27. HPLC profile of *L*-FDAA-derivatives of asterriptide A (1) HP, asterriptide A HP+*L*-Phe and asterriptide A HP+*D,L*-Phe

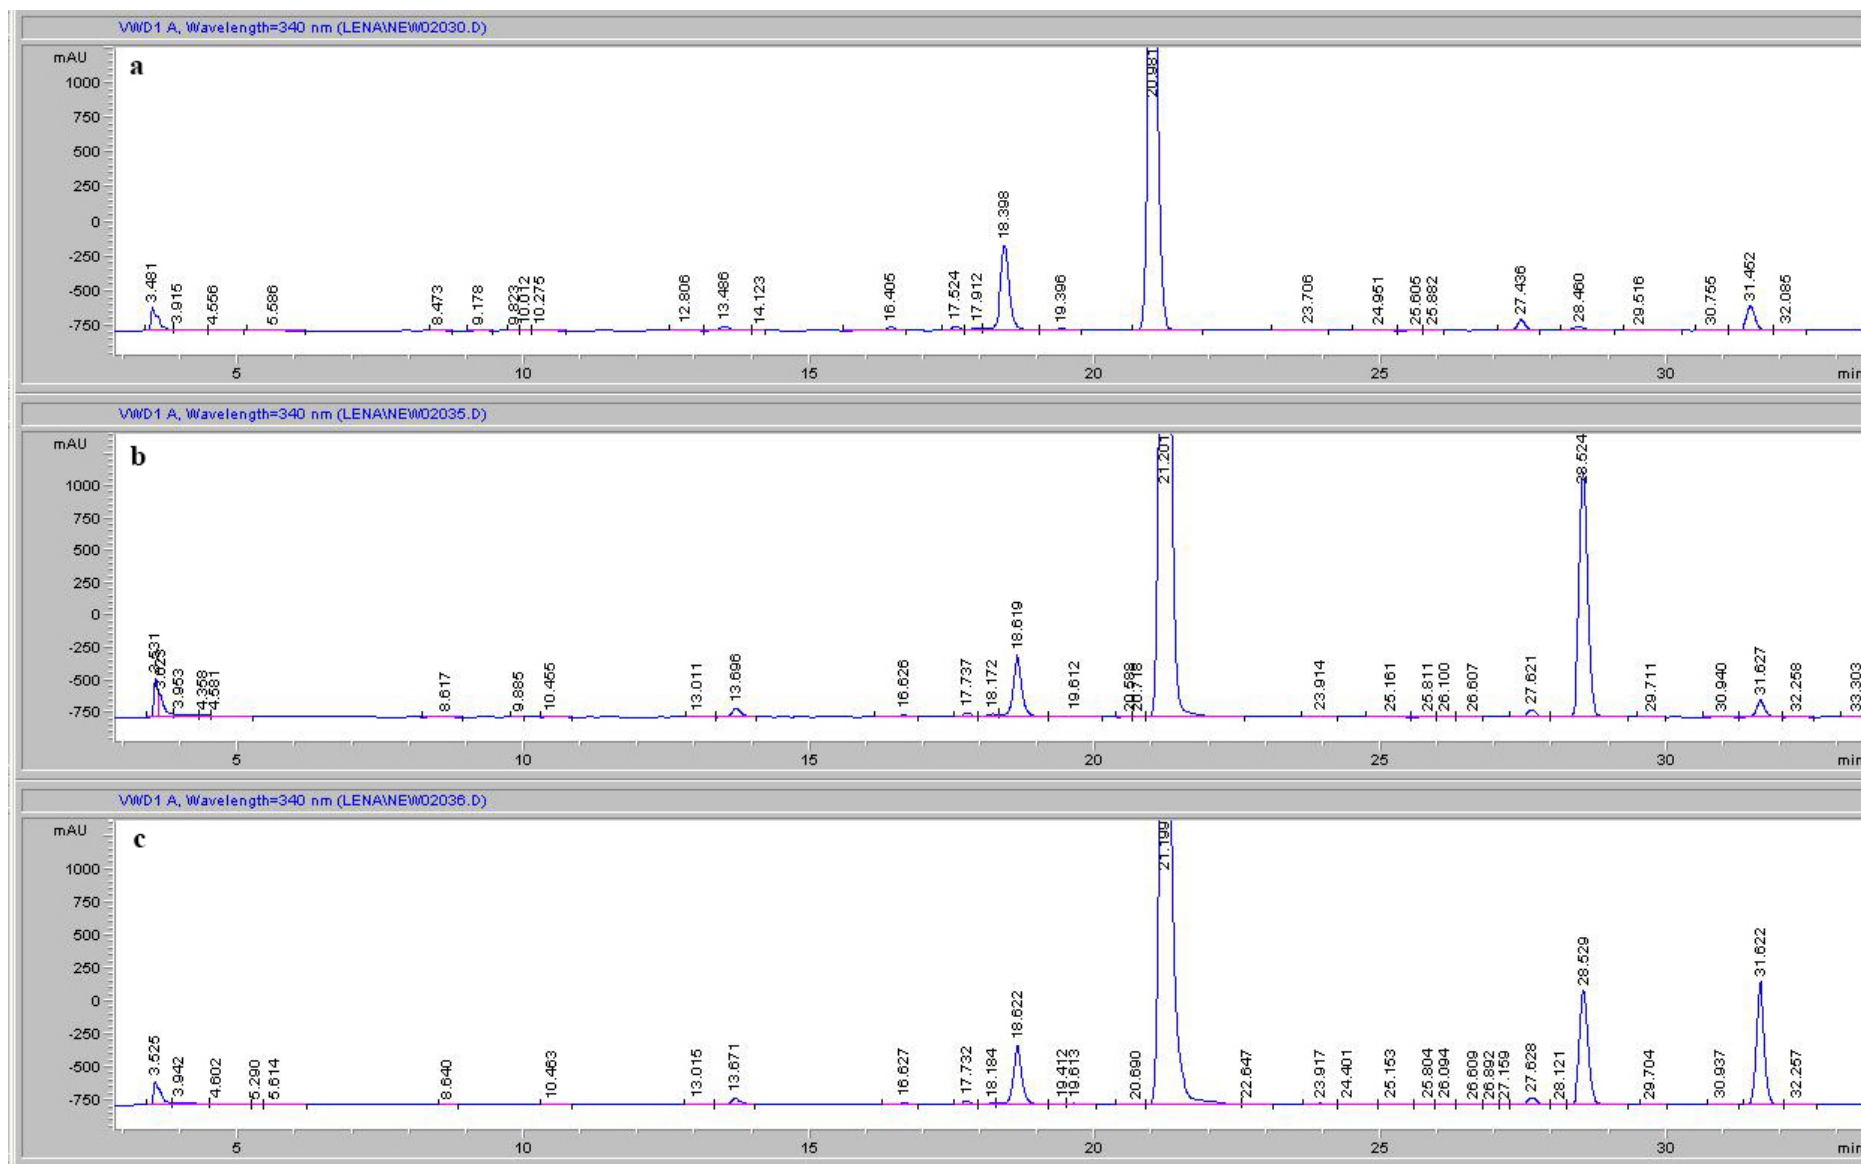

Figure S28. HPLC profile of *L*-FDAA-derivatives of asterriptide A (1) HP, asterriptide A HP+*D,L*-Pro and asterriptide A HP+*L*-Pro

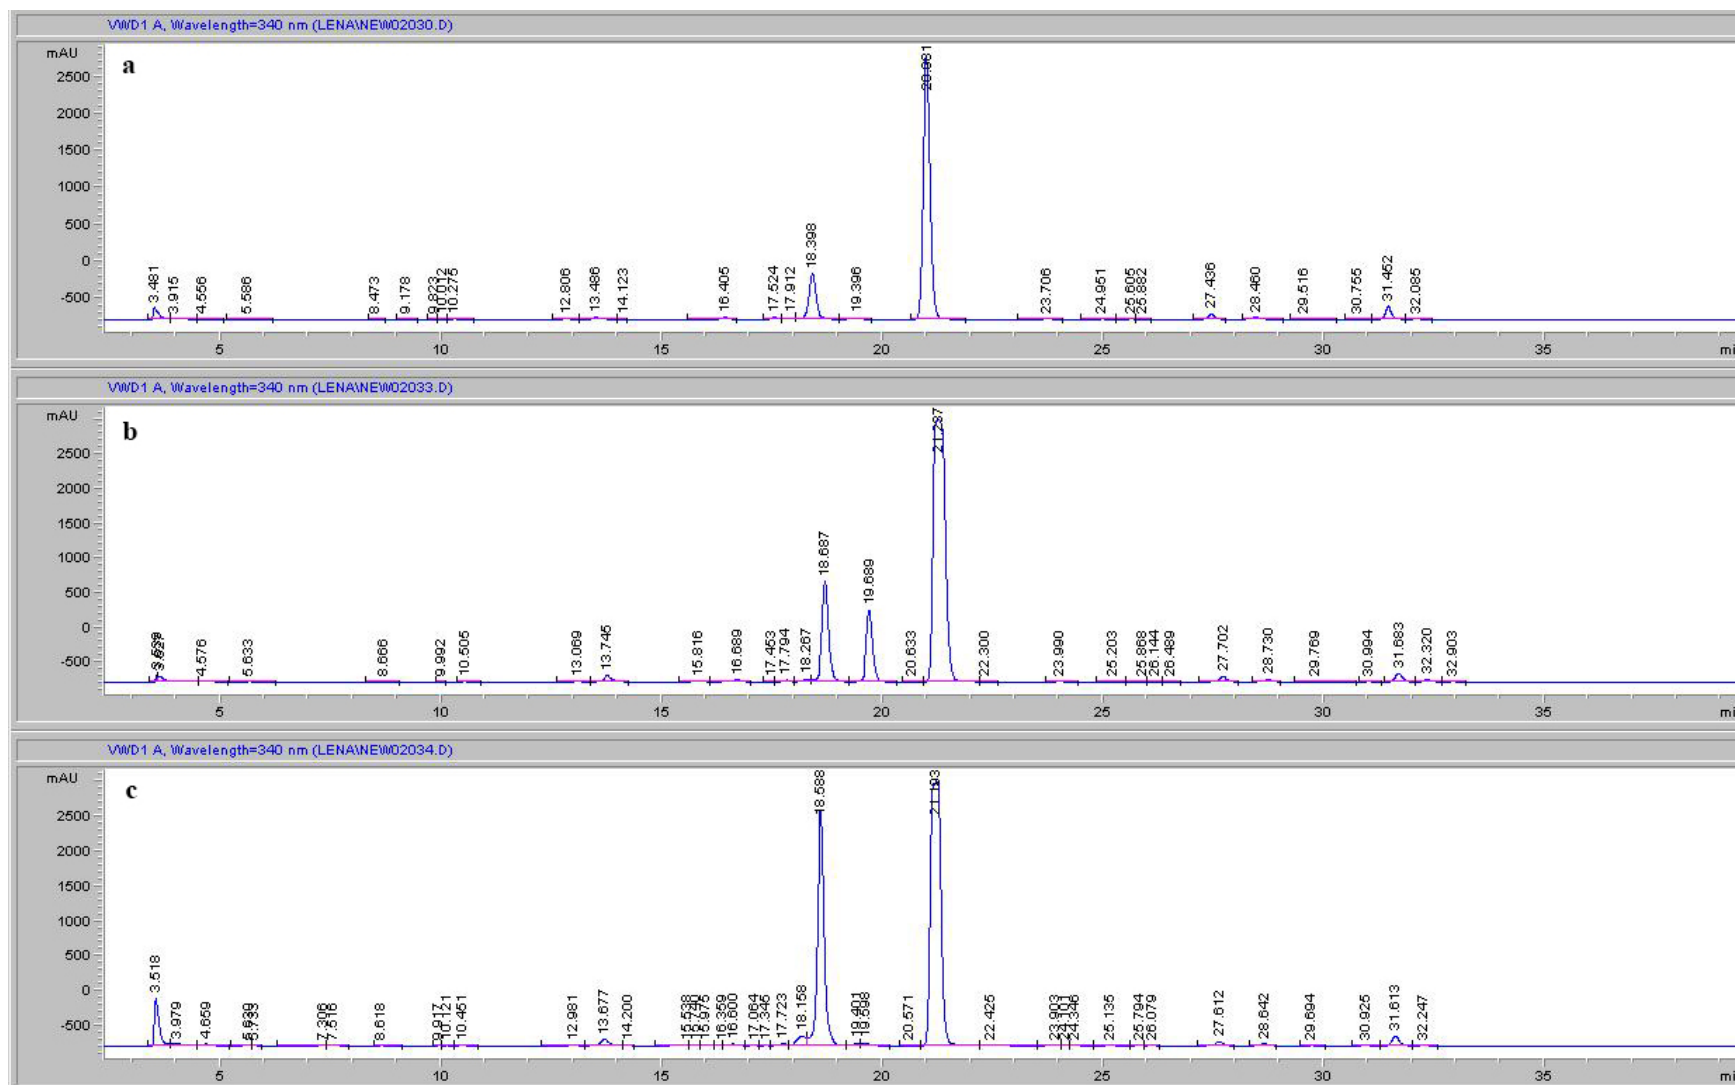

Figure S29. HPLC profile of L-FDAA-derivatives of asterripeptide B (2) HP

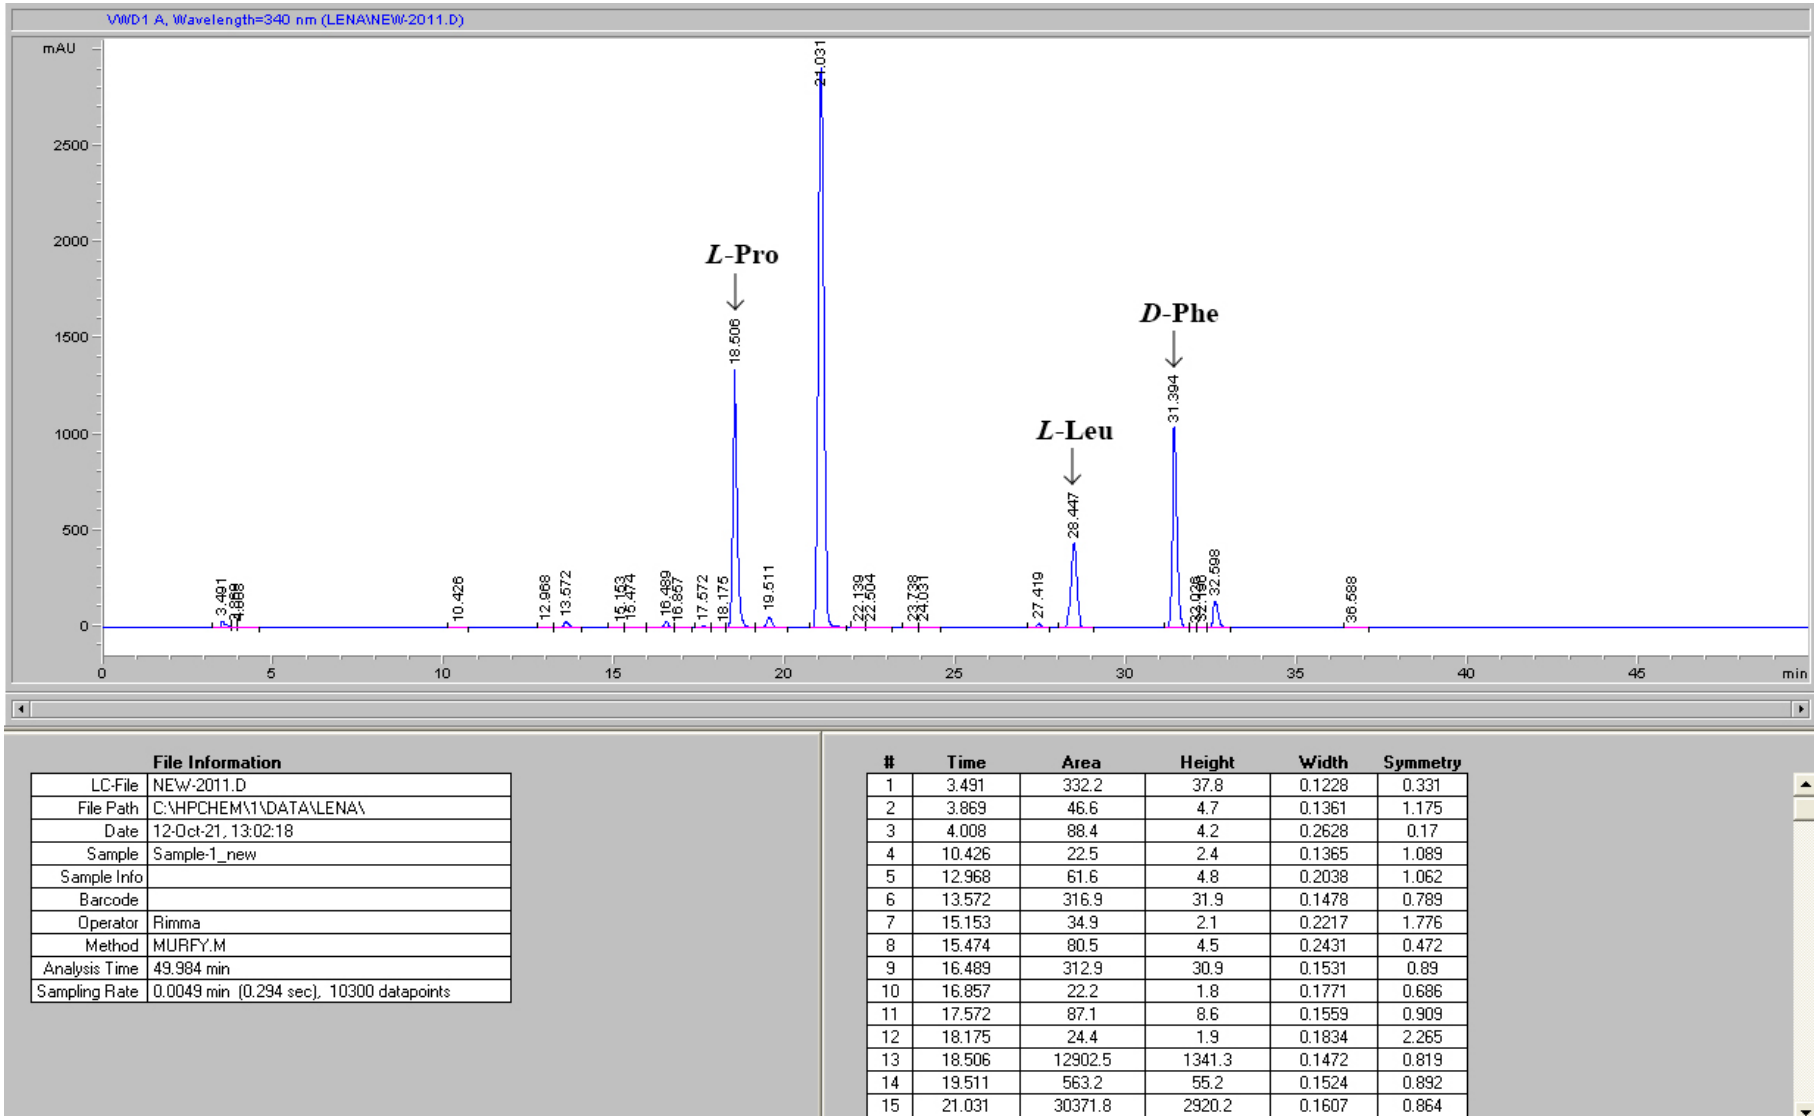

Figure S30. HPLC profiles of *L*-FDAA-derivatives of asterriptide B (2) HP (a), asterriptide B HP+*L*-Leu (b) and asterriptide B HP+*D,L*-Leu (c)

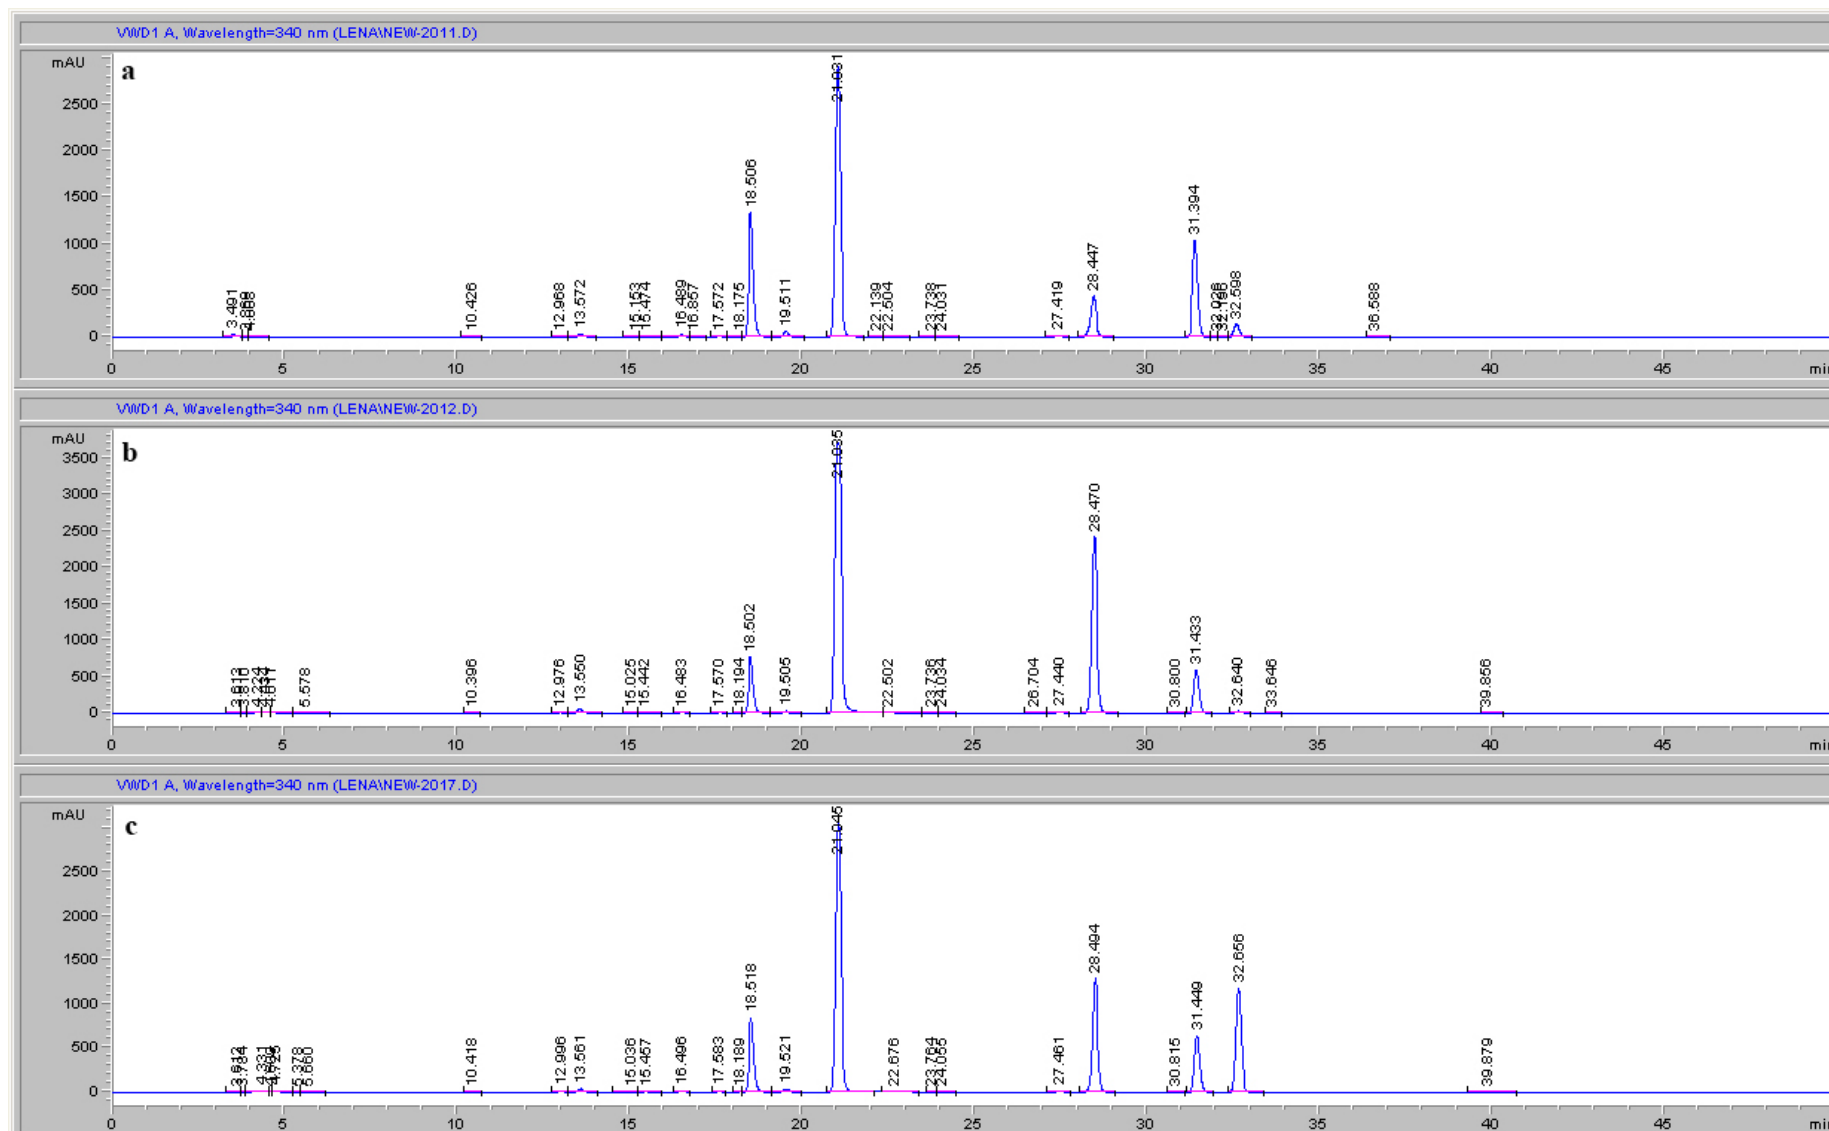

Figure S31. HPLC profiles of *L*-FDAA-derivatives of asterriptide B (2) HP (a), asterriptide B+ *D,L*-Pro (b) and asterriptide B+ *L*-Pro (c)

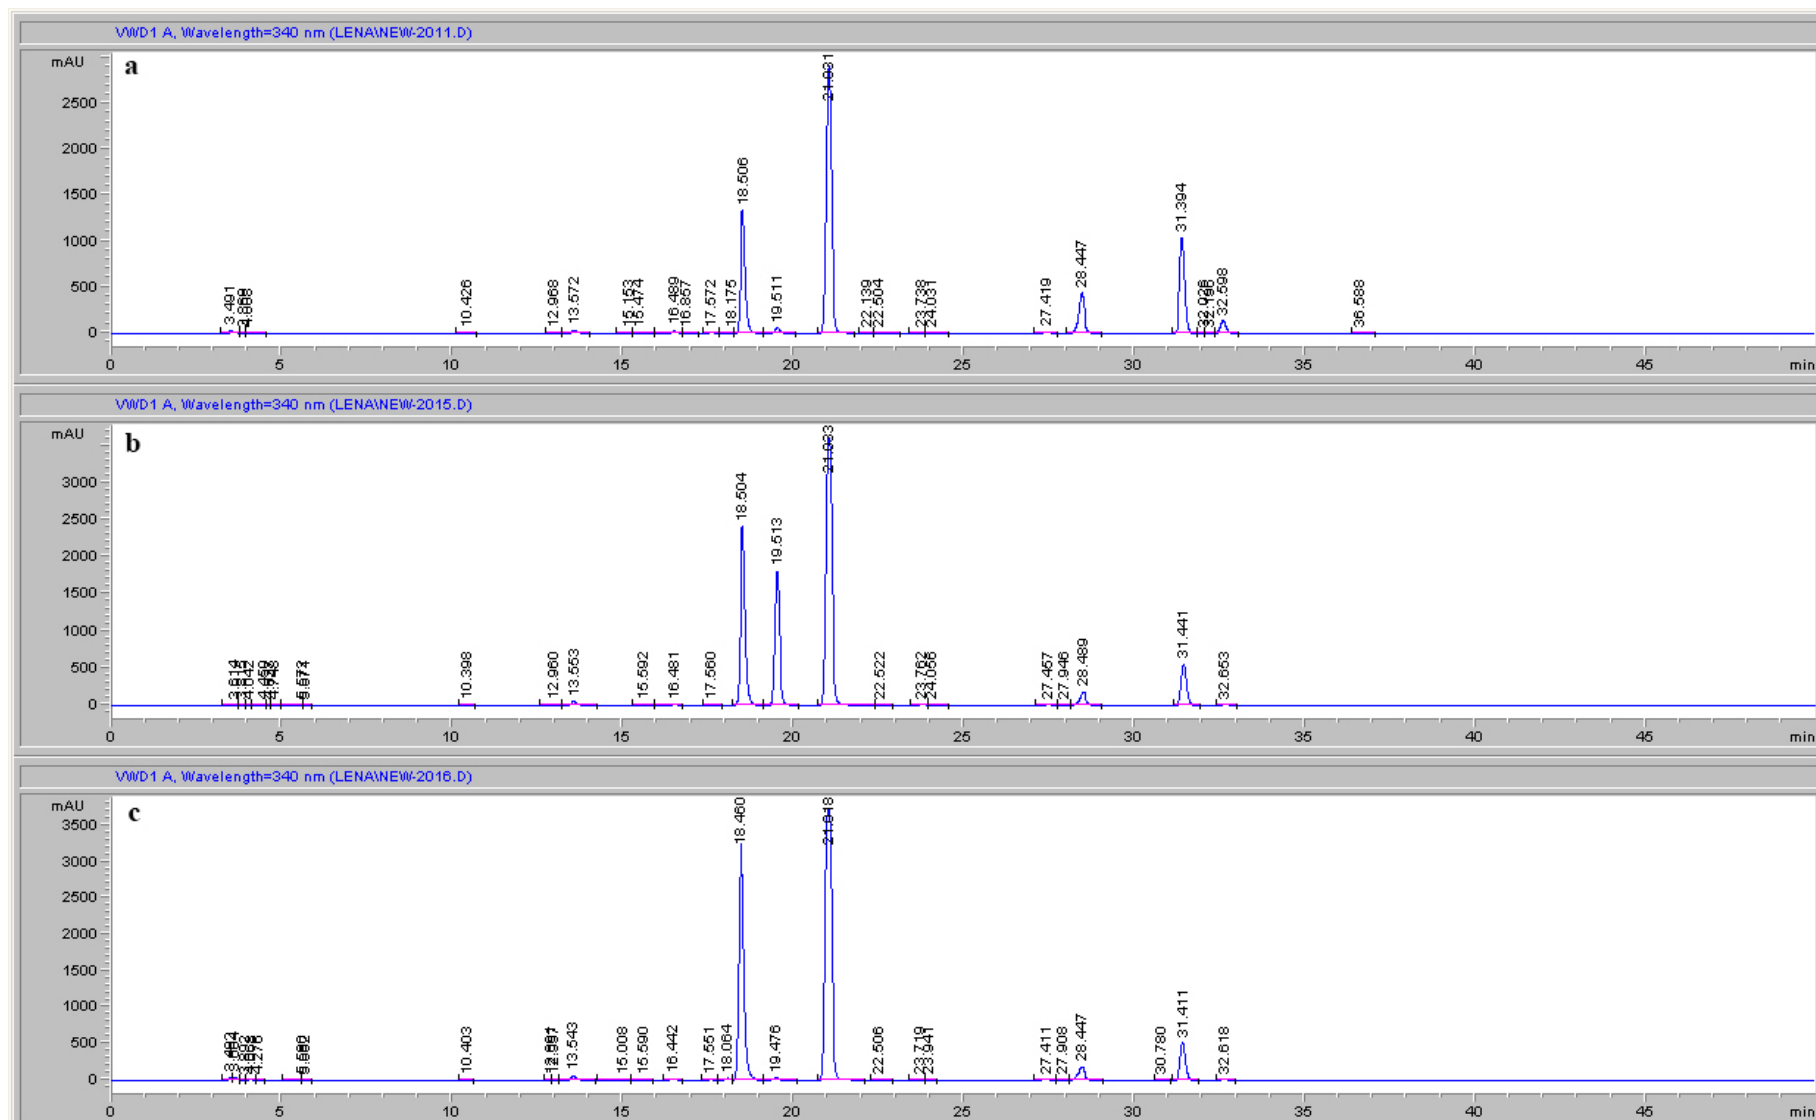

Figure S32. HPLC profiles of *L*-FDAA-derivatives of asterriptide B (2) HP (a), asterriptide B HP+ *L*-Phe (b) and asterriptide B HP+ *D,L*-Phe (c)

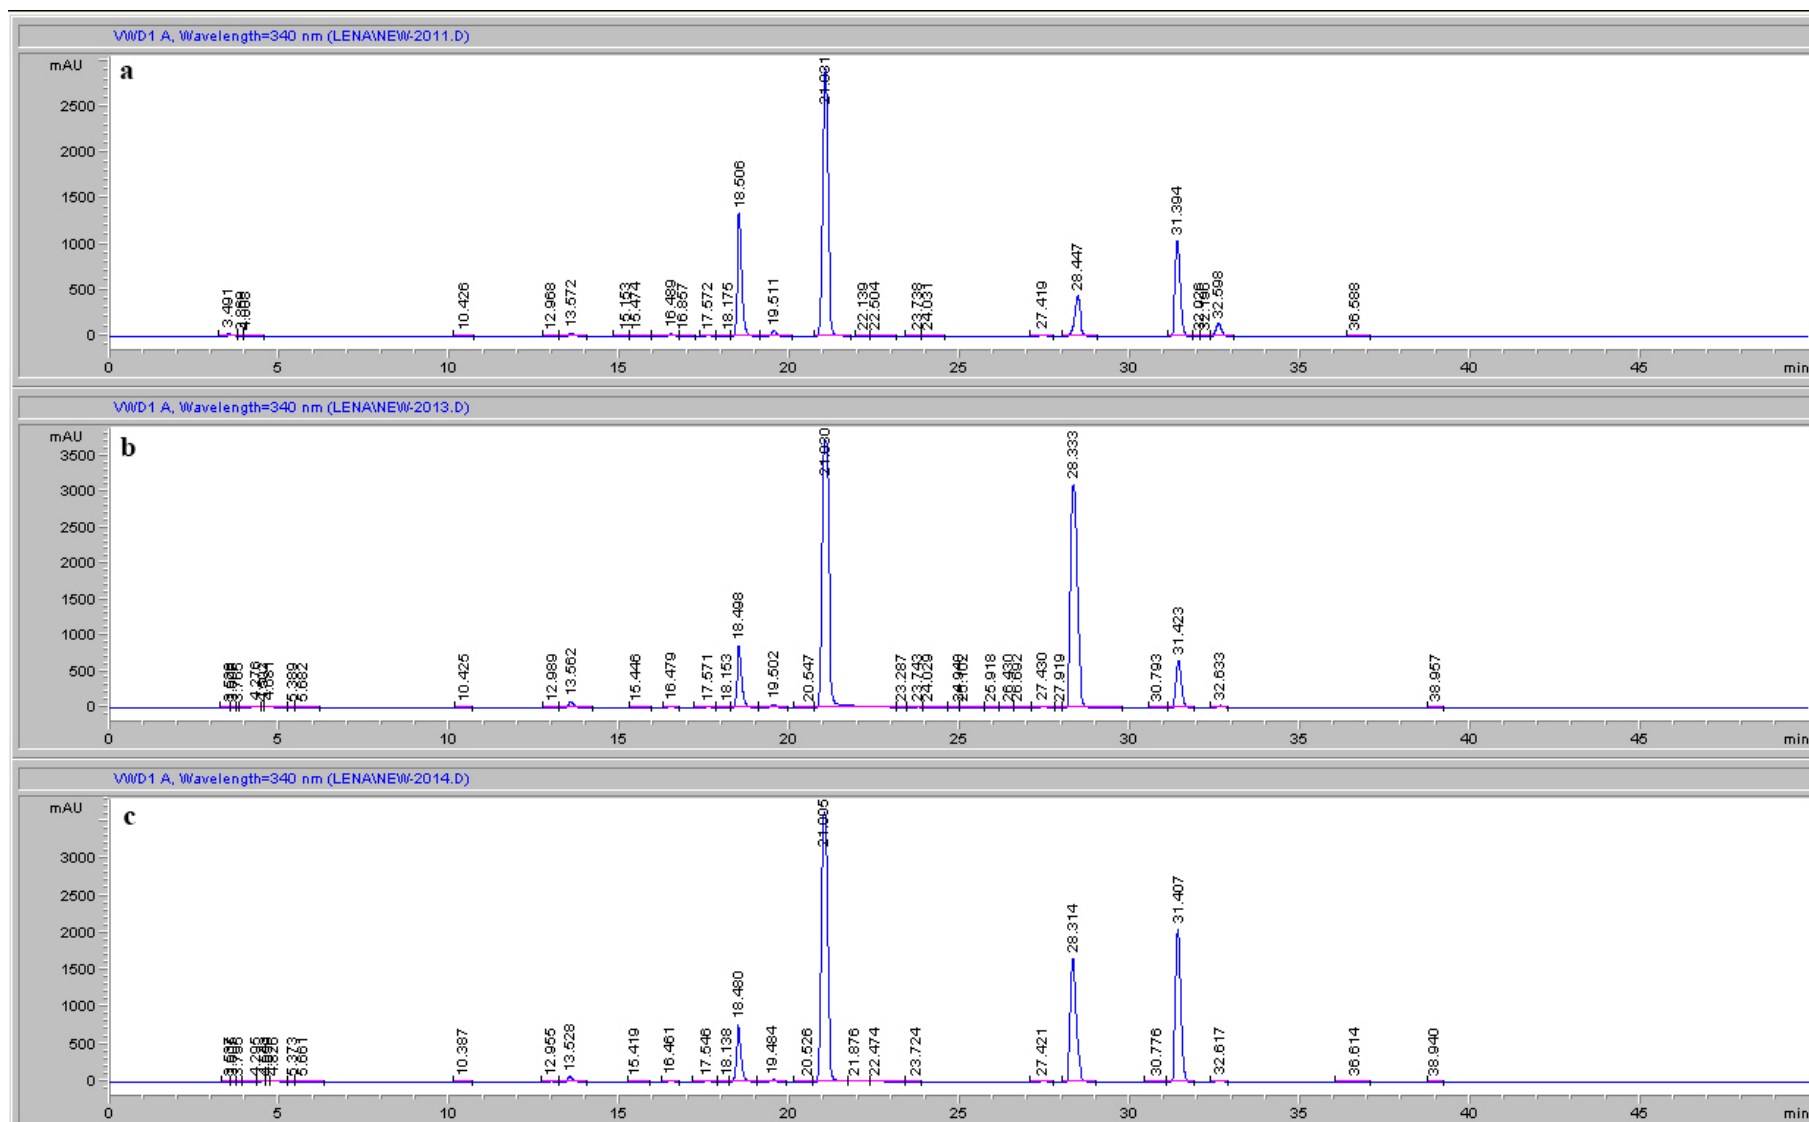

Figure S33. HPLC profile of L-FDAA-derivatives of asterripeptide C (3) HP

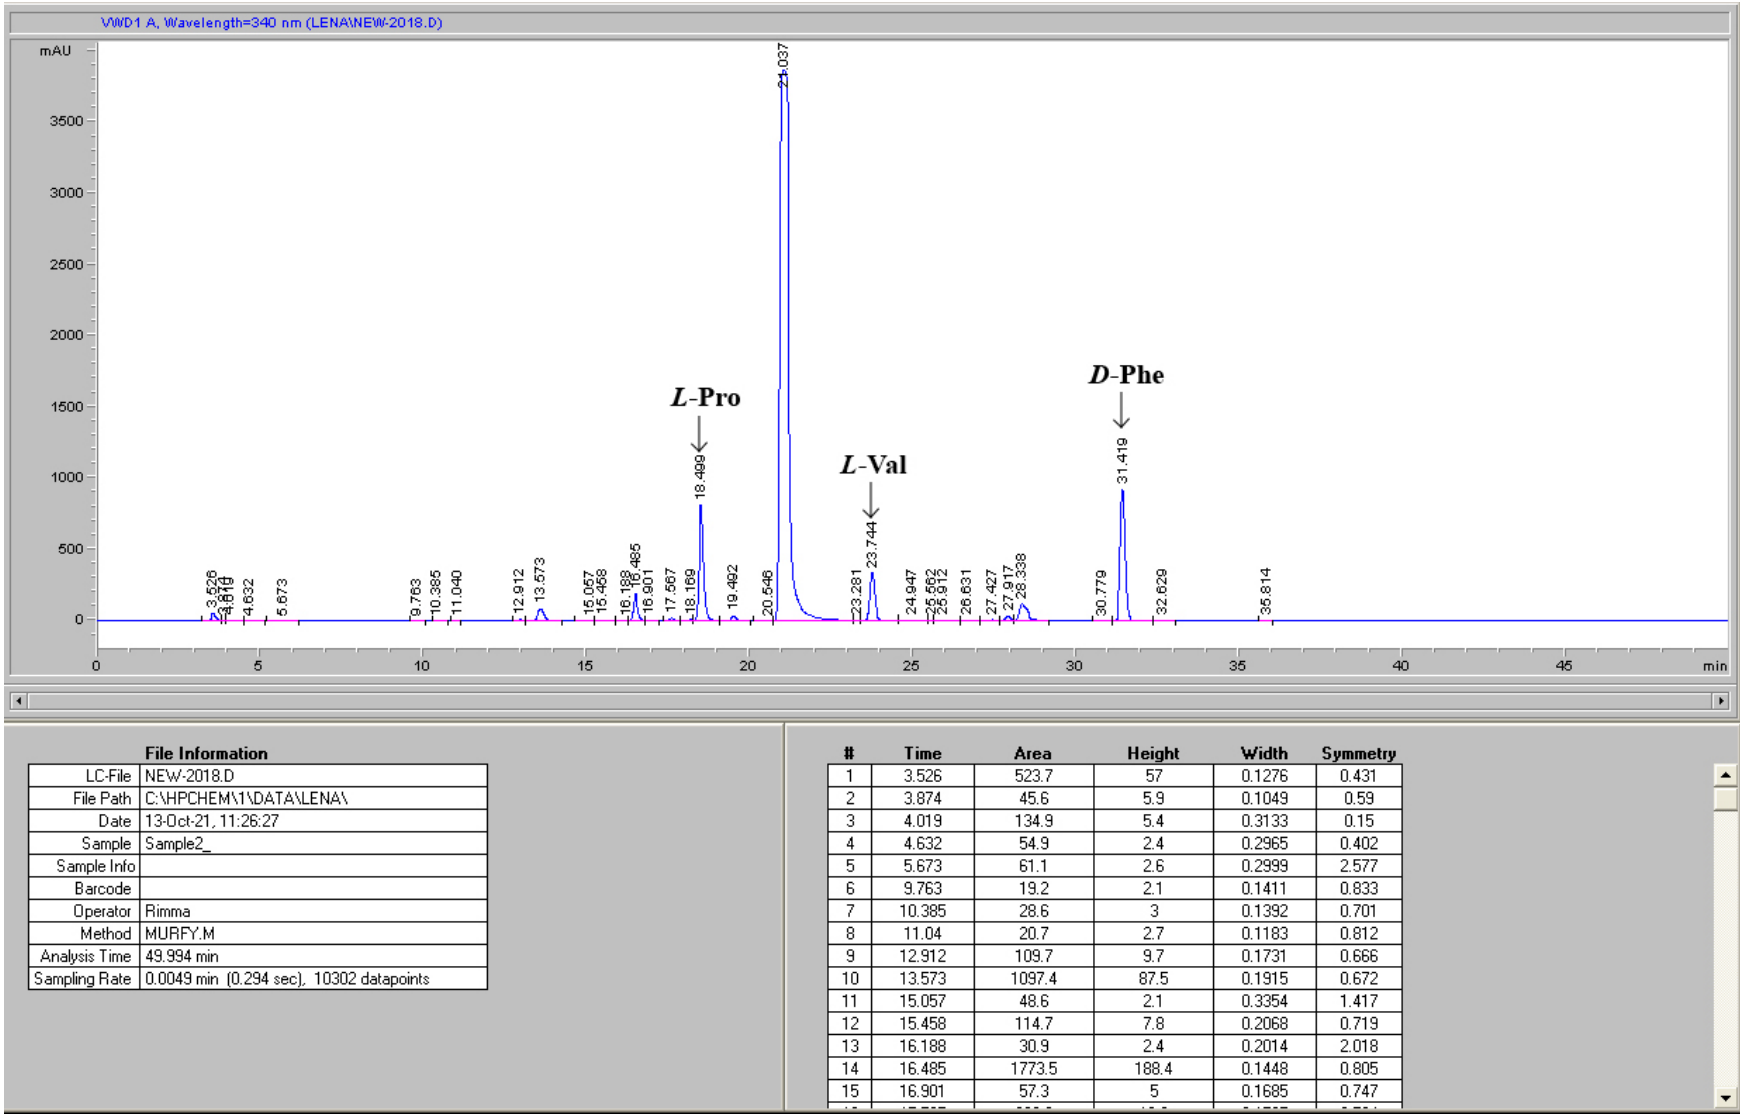

Figure S34. HPLC profiles of *L*-FDAA-derivatives of asterripeptide C (3) HP (a), asterripeptide C+*L*-Val H (b)P and asterripeptide C HP+*D,L*-Val (c)

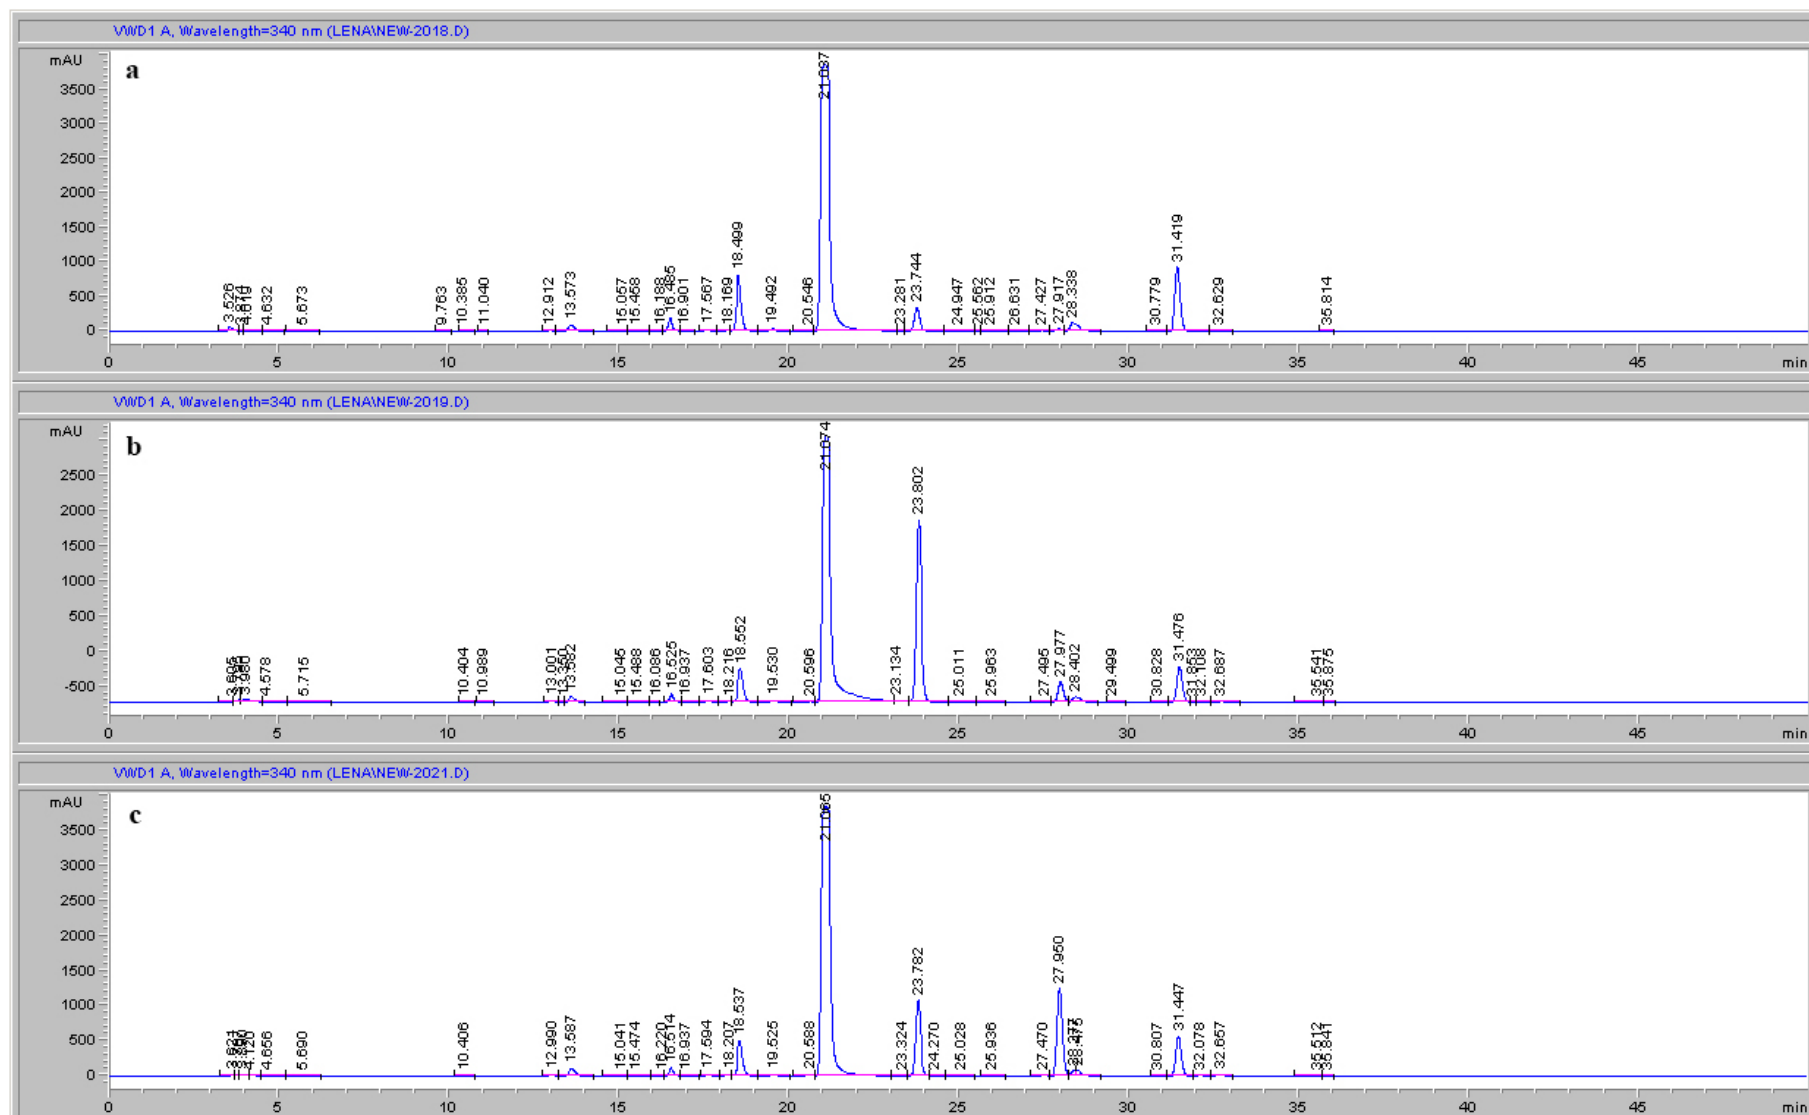



Figure S35. HPLC profiles of *L*-FDAA-derivatives of asterripeptide C (3) HP (a), asterripeptide C HP+*L*-Pro (b) and asterripeptide C HP+*D,L*-Pro (c)

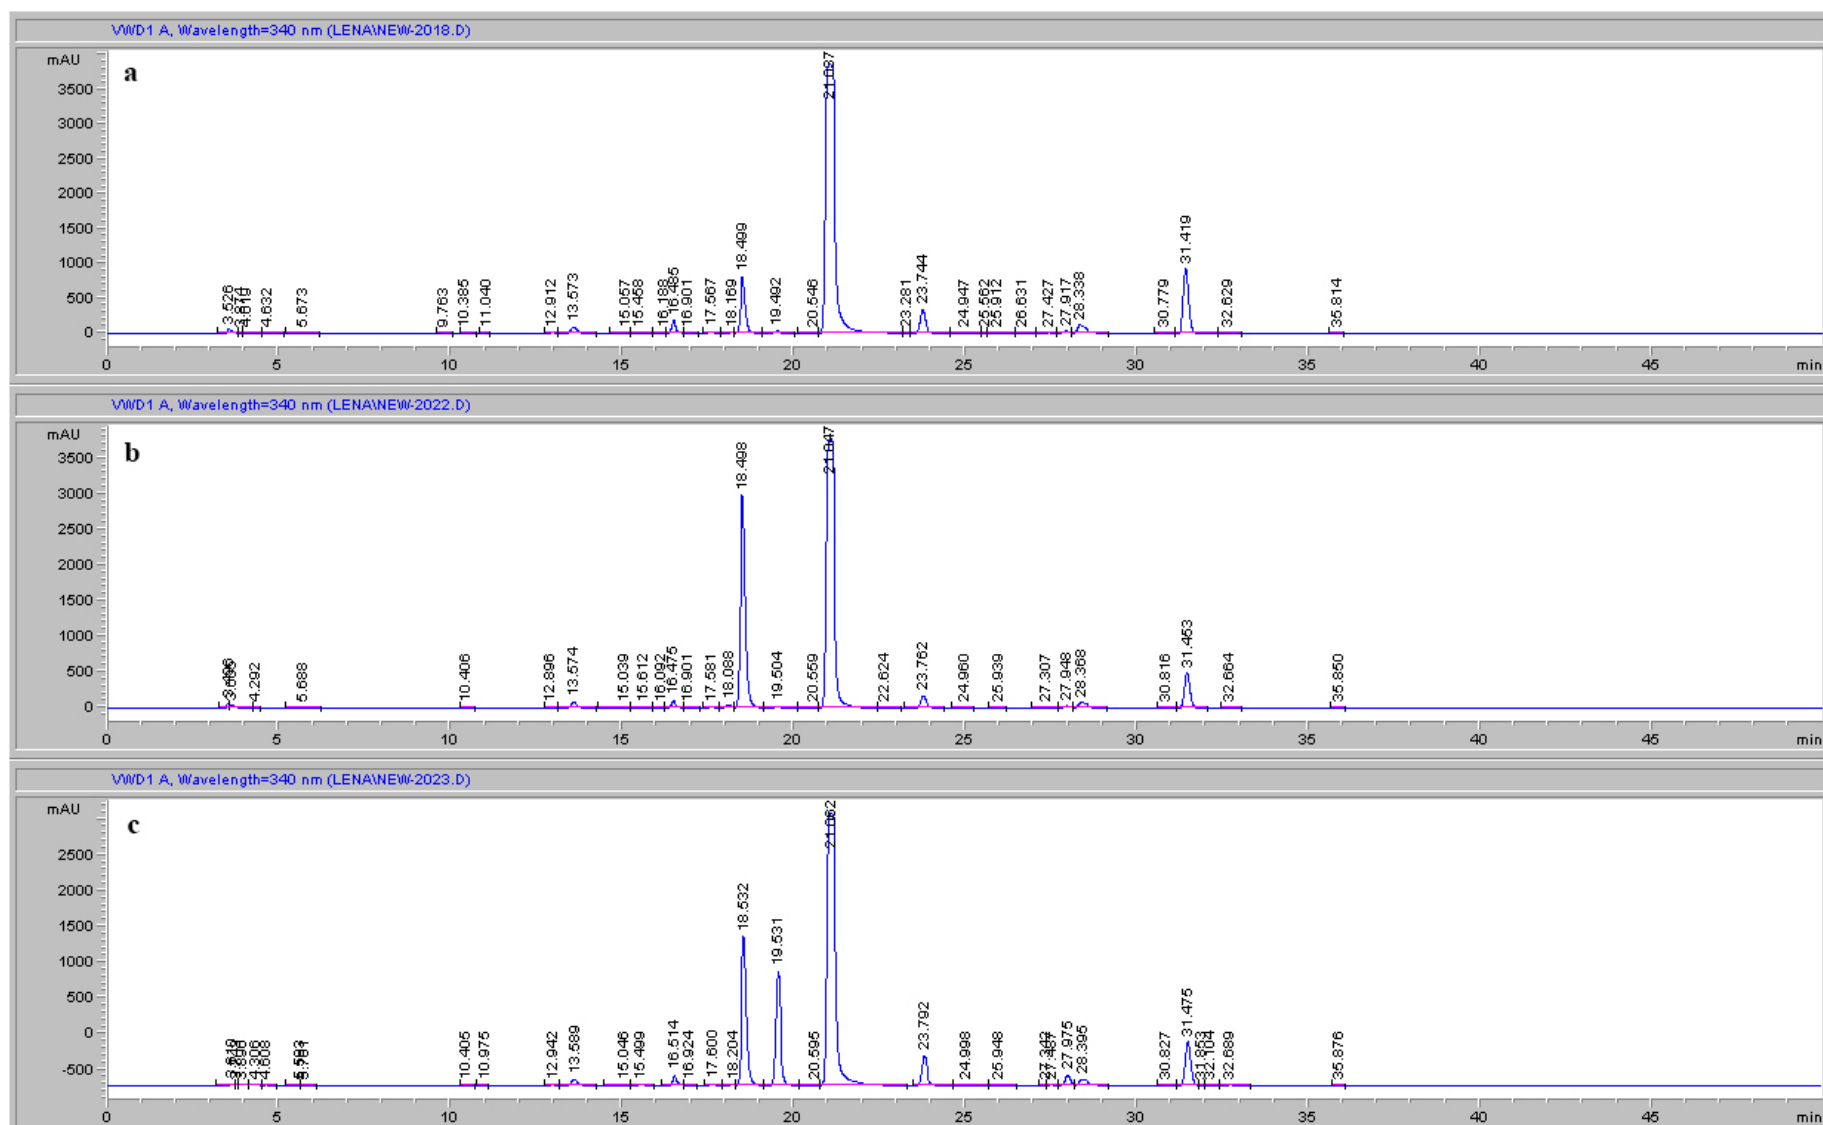

Figure S36. HPLC profiles of *L*-FDAA-derivatives of asterriptide C (3) HP (a), asterriptide C HP+ *D,L*-Phe (b) and asterriptide C HP+*L*-Phe (c)

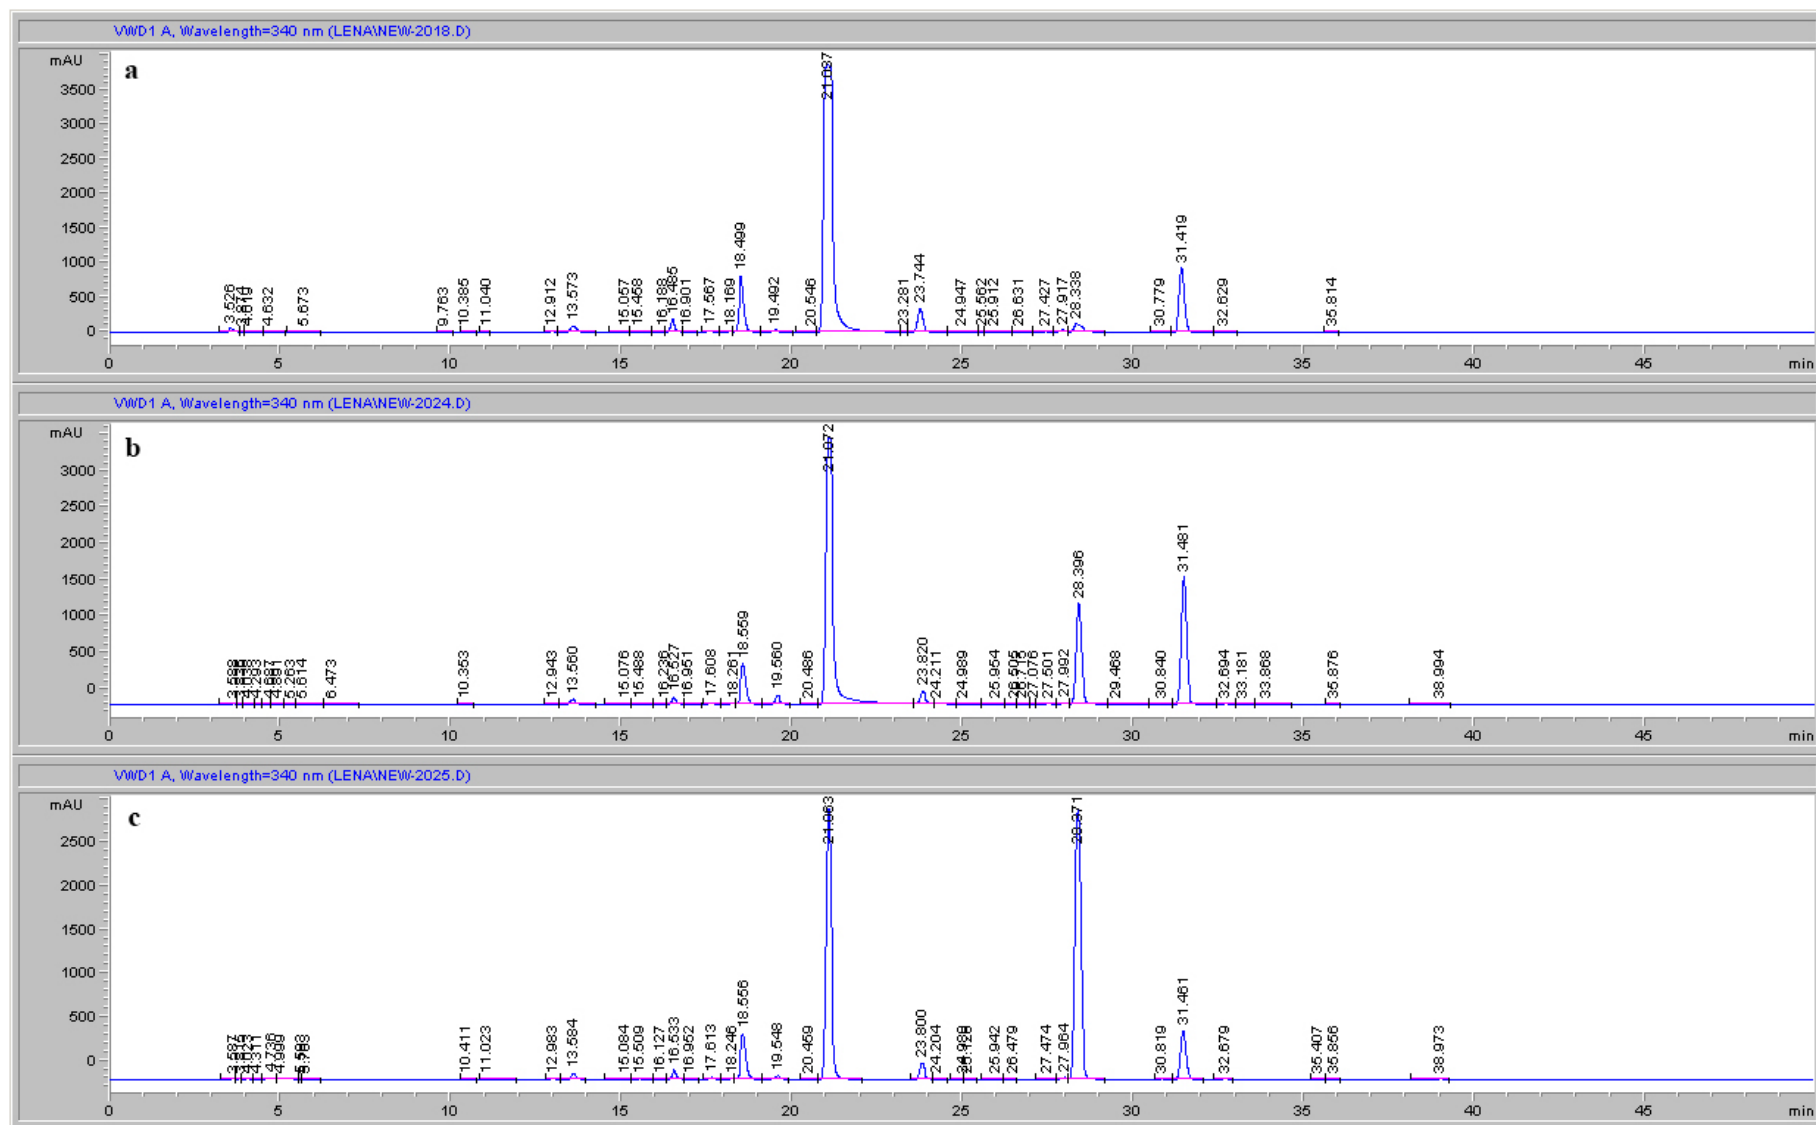

Supplement: s1 [file s1]
